# Supplementary material for: Kullback Leibler divergence in complete bacterial and phage genomes
Source: PeerJ journal article supplement (doi:10.7717/peerj.4026), 2017-11-30

---

## Kullback Leibler Divergence in Complete Bacterial and Phage Genomes

---

Sajia Akhter, Ramy K. Aziz, Mona T. Kashef, Eslam S. Ibrahim, Barbara Bailey, Robert A. Edwards

### Supplemental Material

**T-test for testing the relationship between GC content and amino acid variations for bacteria and phage samples:**

There are two samples: bacteria and phages.

The sample size of bacteria,  $m = 372$

The linear model of bacterial sample:  $y = 2x^2 - 2x + 0.5$  ... (1)

The sample size of phages,  $n = 835$

The linear model of phage sample:  $y = 1.7x^2 - 1.7x + 0.44$  ... (2)

The general form of these equations is:  $y = \beta_0 + \beta_1 x + \beta_2 x^2$

We want to test whether the coefficients ( $\beta_1$  and  $\beta_2$ ) of these two equations are significantly different:

$H_0: \beta_1^1 = \beta_1^2$  and  $\beta_2^1 = \beta_2^2$

$H_A: \beta_1^1 \neq \beta_1^2$  and  $\beta_2^1 \neq \beta_2^2$

where  $\beta_1^1$  is the  $\beta_1$  coefficient of equation 1 (bacterial sample) and  $\beta_1^2$  is the  $\beta_1$  coefficient of equation 2 (phage sample).

T test for two independent unequal sample sizes:

$$t = \frac{\bar{\beta}_p - \bar{\beta}_b}{\sqrt{SE(\beta_p)^2 + SE(\beta_b)^2}}, \text{ where SE is the standard error.}$$

Here, degree of freedom,  $df = m-2 + n-2 = 372-3 + 835-3 = 1201$

For coefficient  $\beta_1$ , p value is 1.058481e-07, and for coefficient  $\beta_2$ , p value is 1.631291e-06. So we can reject the null hypothesis.

This means Equation 1 and Equation 2 are significantly different.

**Supplemental Figure 1: Comparison of the divergence of amino acid composition and the phylogenetic group for the most divergent bacterial genomes.** The first five bars represent *Wigglesworthia glossinidia*, *Borrelia garinii*, *Mycoplasma mycoides*, *Ureaplasma parvum* serovar and *Buchnera aphidicola*. The sixth bar is for the mean of amino acid utilization for each subsystem.

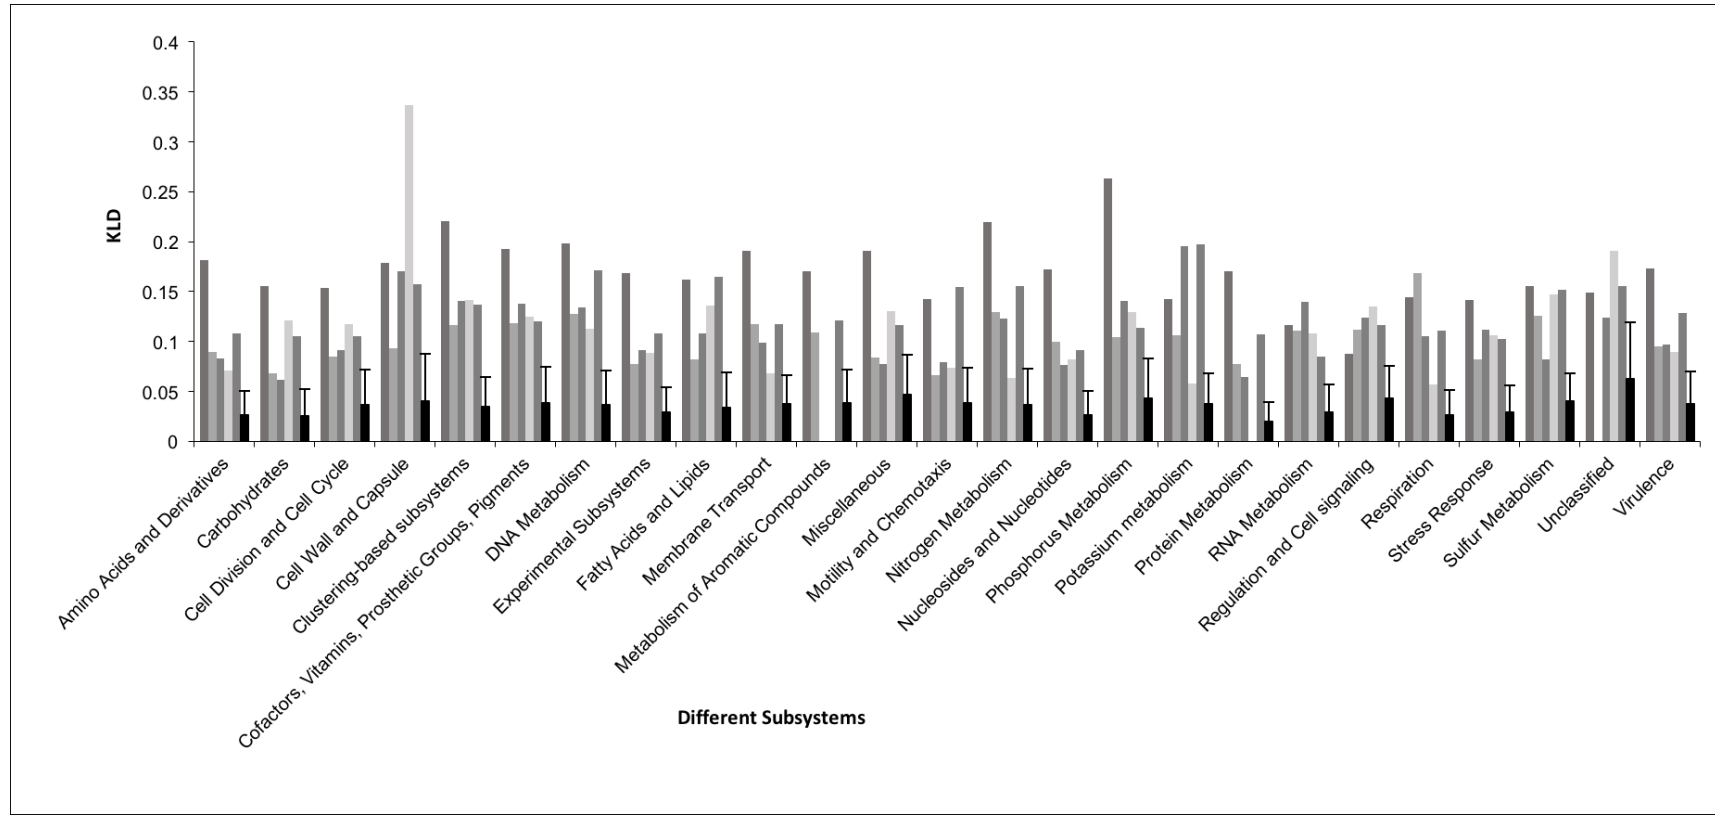

Supplemental Figure 2: Amino acid frequency of 446 bacterial genomes vs. GC%

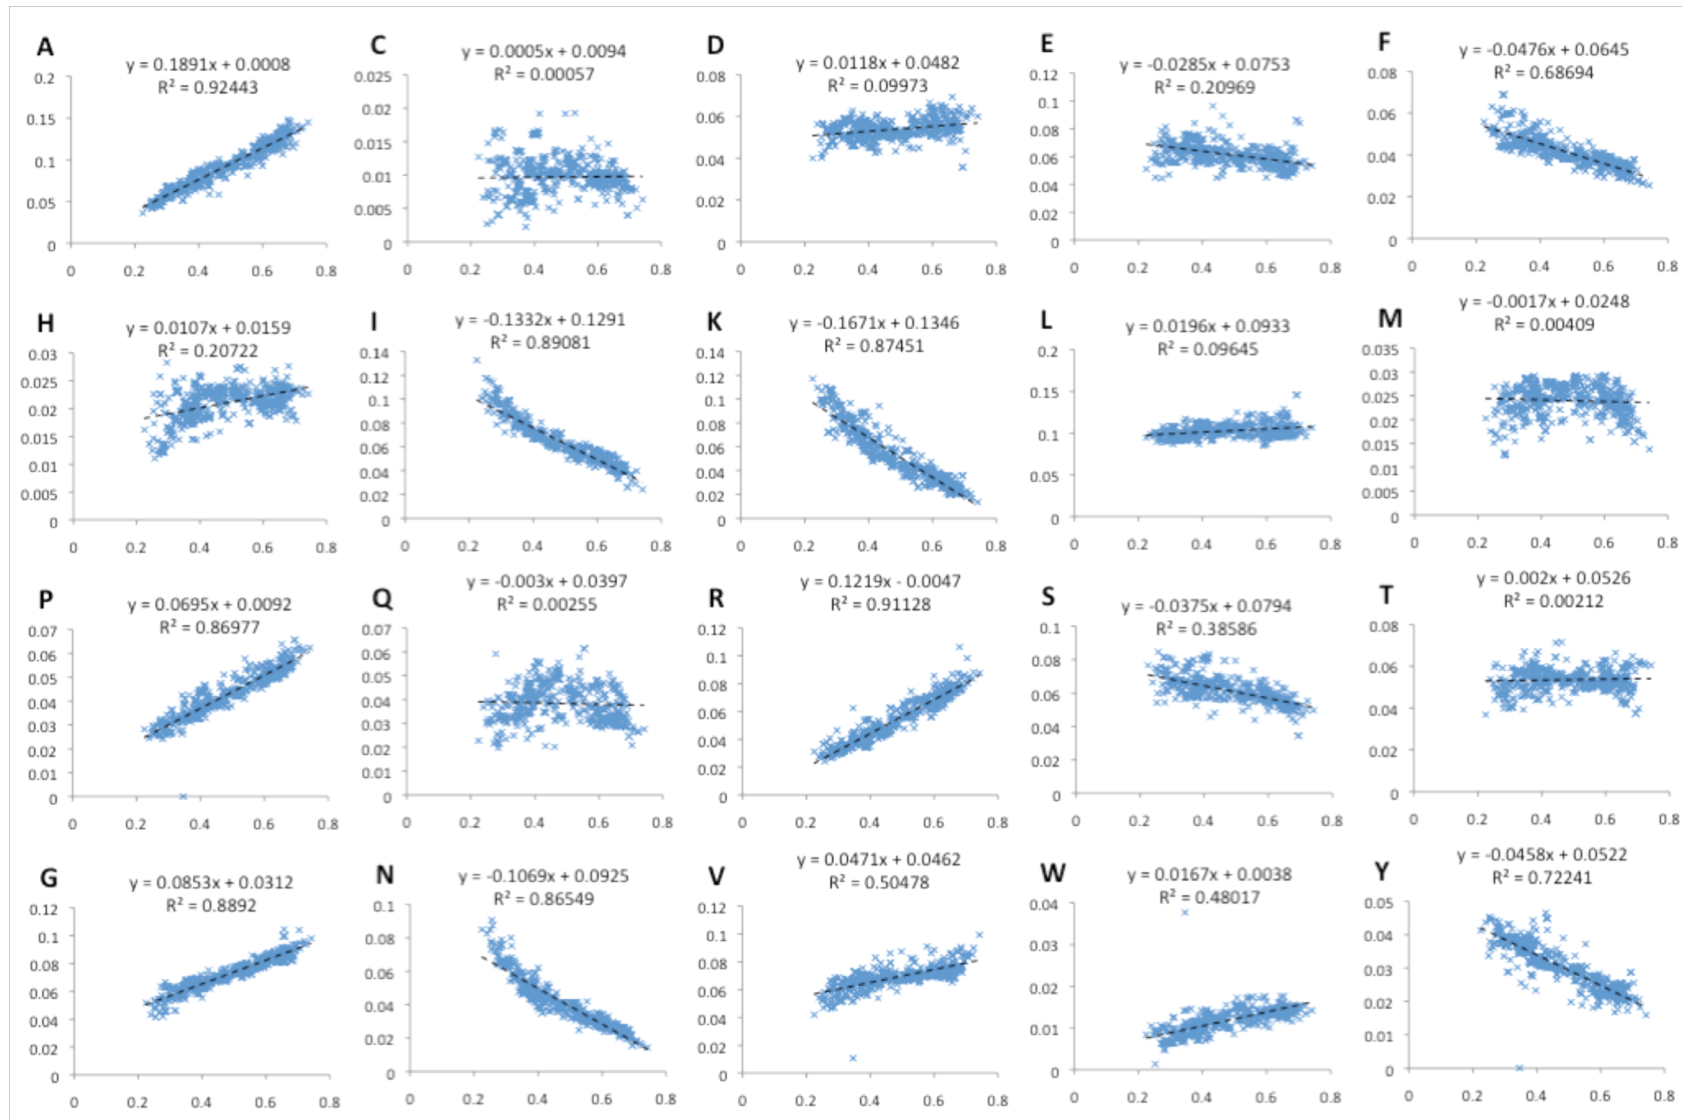

40 Supplemental Figure 3: Amino acid frequency of 835 complete phage genomes vs. GC%

41

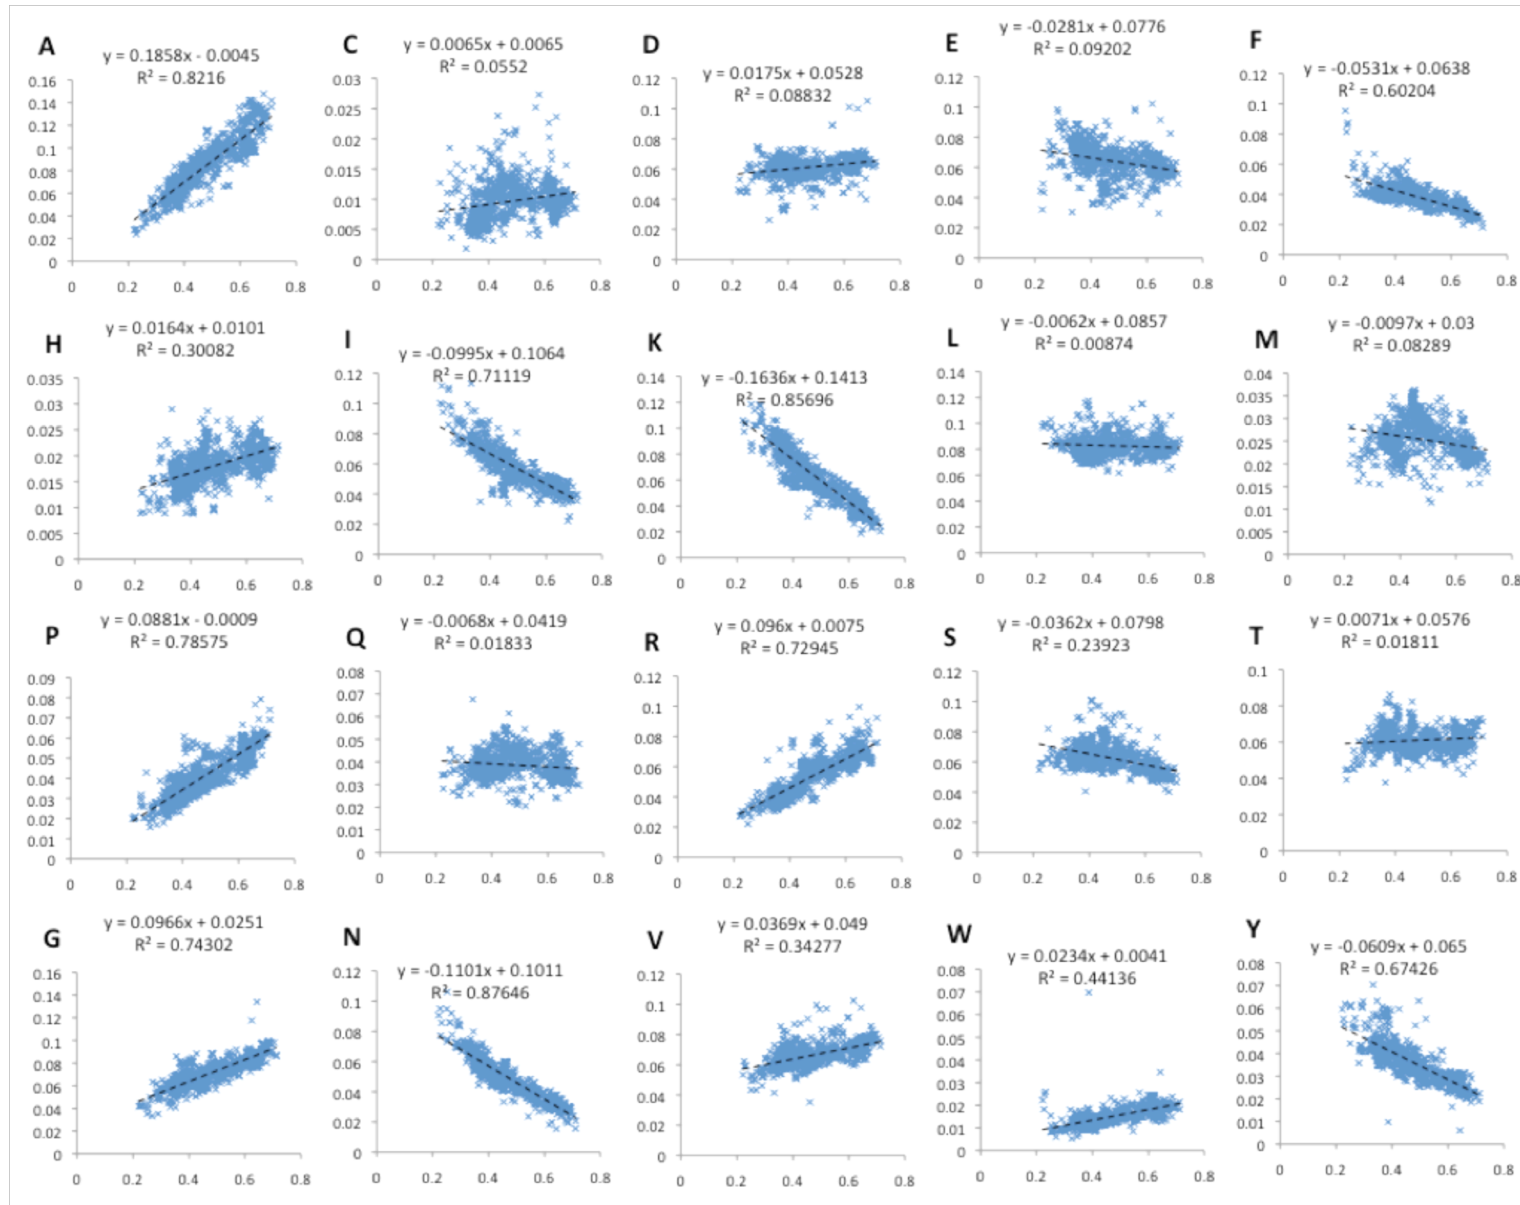

Supplement: Akhter_KLD_PeerJ_Supplement_R1.pdf [file Akhter_KLD_PeerJ_Supplement_R1.pdf]
