# Supplementary material for: Kullback Leibler divergence in complete bacterial and phage genomes
Source: PeerJ. 2017 Nov 30;5:e4026. doi: 10.7717/peerj.4026 (PMC5712468; doi:10.7717/peerj.4026)
Supplement: Supplemental Information 3 [file peerj-05-4026-s003.xlsx]

## Sheet: Sheet1
phage_id	GC%	KLD_Phage				KLD_BACTERIA
455649.2.fasta	0.222109	0.222164	Spiroplasma kunkelii virus SkV1_CR2-3x			0.223849
93224.1.fasta	0.22652	0.210987	Spiroplasma phage SVTS2			0.16221
185959.1.fasta	0.231591	0.199345	Spiroplasma phage 1-C74			0.162065
189836.1.fasta	0.642833	0.191892	Propionibacterium phage B5			0.162029
10854.1.fasta	0.228938	0.18554	Spiroplasma phage 1-R8A2B			0.16158
10876.1.fasta	0.332888	0.183393	Acholeplasma phage MV-L1			0.155652
280702.3.fasta	0.25104	0.167284	Mycoplasma phage phiMFV1			0.155379
658056.2.fasta	0.252721	0.153463	Clostridium phage D-1873 CLG.Contig168			0.154326
35238.1.fasta	0.267925	0.151606	Mycoplasma phage P1			0.15423
12336.2.fasta	0.26284	0.132983	Clostridium phage c-st			0.152905
934027.3.fasta	0.261535	0.130393	Campylobacter phage NCTC12673			0.152384
157898.2.fasta	0.252693	0.129432	Sulfolobus islandicus rod-shaped virus 1			0.148945
75590.1.fasta	0.290335	0.128971				0.143354
157899.2.fasta	0.251989	0.128233				0.130654
10702.1.fasta	0.711377	0.116096	Streptomyces phage VWB			0.127103
864178.3.fasta	0.283799	0.113177				0.120792
370623.2.fasta	0.711944	0.105124				0.116964
407392.2.fasta	0.32586	0.104699				0.116326
668994.3.fasta	0.679502	0.098458	Thermus phage P23-77			0.114602
470865.2.fasta	0.289441	0.0983372	44AHJD-like phages Staphylococcus phage SAP-2			0.112543
396359.2.fasta	0.281293	0.0974344				0.105462
320832.3.fasta	0.292873	0.0961348				0.102863
204090.1.fasta	0.293246	0.0946036				0.102
6666666.3762.fasta	0.684376	0.093519				0.101735
49964.1.fasta	0.677454	0.0926218				0.10128
204086.1.fasta	0.296235	0.0922068				0.099602
262071.2.fasta	0.287258	0.0919135				0.097571
446529.2.fasta	0.683145	0.0906119				0.097565
320122.2.fasta	0.287726	0.0891649				0.097269
326574.3.fasta	0.683836	0.0862966				0.092788
320831.3.fasta	0.31417	0.0849718				0.092461
190478.1.fasta	0.283821	0.0846977				0.092177
1032362.3.fasta	0.308299	0.0845939				0.092018
164037.1.fasta	0.65944	0.0845872				0.091548
480808.2.fasta	0.672678	0.0833459				0.09121
559189.2.fasta	0.293265	0.0813922				0.090839
543939.2.fasta	0.270403	0.0810796				0.08963
332032.3.fasta	0.648184	0.0801763				0.089171
55510.3.fasta	0.30261	0.0783327				0.087725
292639.2.fasta	0.495295	0.0752325				0.08748
151539.1.fasta	0.330391	0.0750365				0.087308
437444.2.fasta	0.345637	0.0747318				0.086678
459290.3.fasta	0.384737	0.0746862				0.085184
541865.2.fasta	0.304209	0.0740285				0.083969
512792.2.fasta	0.346449	0.0735621				0.082781
176106.2.fasta	0.333521	0.0728846				0.081088
151534.1.fasta	0.342385	0.0726484				0.080774
46014.1.fasta	0.319599	0.0723396				0.079
12023.1.fasta	0.542085	0.0711325				0.078695
256994.2.fasta	0.375341	0.0711022				0.077695
416419.2.fasta	0.648861	0.0706711				0.077552
10862.3.fasta	0.580733	0.0705995				0.077155
244590.2.fasta	0.384969	0.0697383				0.076753
300186.2.fasta	0.356561	0.0691537				0.076409
459291.2.fasta	0.384801	0.0676876				0.074385
279303.3.fasta	0.703878	0.0670049				0.073425
292029.3.fasta	0.303882	0.0663445				0.072916
693627.2.fasta	0.381918	0.0653421				0.068781
205874.1.fasta	0.689567	0.0649874				0.063596
6666666.3736.fasta	0.689928	0.0646859				0.063246
6666666.3734.fasta	0.689098	0.0636789				0.062692
6666666.3778.fasta	0.689552	0.0636214				0.062216
926543.3.fasta	0.616621	0.0634283				0.060983
543152.2.fasta	0.683423	0.0633231				0.060804
373414.2.fasta	0.689632	0.0624677				0.060638
573591.2.fasta	0.636905	0.0622344				0.060234
10857.2.fasta	0.364978	0.0618586				0.059175
114777.1.fasta	0.618876	0.0613708				0.058925
373406.2.fasta	0.691058	0.0612786				0.058677
693628.2.fasta	0.389842	0.0609605				0.058659
881953.3.fasta	0.326894	0.0605493				0.05816
6666666.3851.fasta	0.685573	0.0604791				0.057481
10870.1.fasta	0.407523	0.0602757				0.057015
230871.1.fasta	0.346258	0.0602197				0.055762
10863.2.fasta	0.409396	0.0601601				0.054957
6666666.3747.fasta	0.690748	0.0600966				0.053962
384359.2.fasta	0.599178	0.0595602				0.053795
6666666.3830.fasta	0.673034	0.0590287				0.053763
244589.2.fasta	0.396961	0.0589961				0.053649
6666666.3872.fasta	0.688755	0.05893				0.053301
10864.2.fasta	0.408864	0.0584188				0.052481
6666666.3731.fasta	0.663943	0.0581119				0.052336
145579.1.fasta	0.461036	0.0581052				0.052006
285013.2.fasta	0.352153	0.057945				0.051773
6666666.13471.fasta	0.688259	0.057897				0.051763
861045.5.fasta	0.668768	0.0577966				0.051654
247080.1.fasta	0.569004	0.05763				0.051612
6666666.3708.fasta	0.666158	0.0576119				0.051568
248496.2.fasta	0.38746	0.0576007				0.051544
66797.1.fasta	0.34635	0.0571353				0.051496
179237.1.fasta	0.614863	0.0568882				0.051464
6666666.3726.fasta	0.666063	0.0566599				0.051437
346881.2.fasta	0.368538	0.0565656				0.051334
520962.2.fasta	0.596483	0.0564725				0.051302
259901.1.fasta	0.335331	0.0564607				0.050824
346882.2.fasta	0.368699	0.0564206				0.050191
861044.5.fasta	0.663881	0.0563144				0.049559
346884.2.fasta	0.36803	0.0560242				0.04768
213236.1.fasta	0.665024	0.0559645				0.047429
373409.2.fasta	0.665103	0.0557956				0.046672
55511.2.fasta	0.342504	0.0556503				0.045477
88870.1.fasta	0.681137	0.0554075				0.044061
6666666.3852.fasta	0.665612	0.0553202				0.043584
6666666.3793.fasta	0.665204	0.0552977				0.043455
6666666.3783.fasta	0.66519	0.0552062				0.043289
563124.2.fasta	0.664982	0.0551699				0.042576
6666666.3794.fasta	0.665091	0.0550573				0.042029
294631.3.fasta	0.305979	0.0550133				0.041823
6666666.3723.fasta	0.66515	0.0548301				0.041314
6666666.3844.fasta	0.665025	0.054747				0.041308
503388.2.fasta	0.336585	0.0547403				0.041217
6666666.3785.fasta	0.665047	0.0547142				0.04108
373407.2.fasta	0.667218	0.0546684				0.040746
649688.2.fasta	0.6669	0.0546164				0.040446
225979.1.fasta	0.327776	0.0545897				0.040013
6666666.3724.fasta	0.665301	0.0545605				0.039913
6666666.3800.fasta	0.65295	0.0545502				0.039323
6666666.3749.fasta	0.664945	0.0545062				0.038764
6666666.3766.fasta	0.664557	0.0543739				0.03859
387909.2.fasta	0.329929	0.0543208				0.038545
6666666.3780.fasta	0.664492	0.0542941				0.038525
431892.2.fasta	0.646171	0.0542644				0.038359
6666666.3847.fasta	0.664569	0.0542394				0.038243
6666666.3818.fasta	0.664523	0.054194				0.038172
515982.2.fasta	0.665593	0.0540368				0.038056
6666666.3827.fasta	0.664607	0.0539634				0.037962
6666666.3870.fasta	0.664882	0.0538995				0.037628
6666666.3758.fasta	0.659883	0.0538128				0.037544
6666666.3777.fasta	0.664746	0.0538039				0.036911
6666666.3863.fasta	0.664803	0.05364				0.036554
6666666.3854.fasta	0.664553	0.0535435				0.036335
6666666.3874.fasta	0.665079	0.0534627				0.036151
6666666.3821.fasta	0.663272	0.0533591				0.035647
6666666.3865.fasta	0.664501	0.0533445				0.035633
6666666.3738.fasta	0.665688	0.053288				0.035518
130478.1.fasta	0.333147	0.0531681				0.035493
6666666.3884.fasta	0.663817	0.0531435				0.035287
6666666.3781.fasta	0.66564	0.0530369				0.035081
6666666.3816.fasta	0.663882	0.0529617				0.034291
384360.2.fasta	0.626088	0.0527668				0.034231
648017.2.fasta	0.335678	0.0527572				0.034125
129009.1.fasta	0.334758	0.0525002				0.03346
445515.2.fasta	0.336199	0.0524493				0.033095
406340.2.fasta	0.653483	0.0523279				0.033068
6666666.3725.fasta	0.684229	0.0522767				0.03266
71366.1.fasta	0.335547	0.0522458				0.032447
668618.2.fasta	0.339933	0.0521506				0.032372
505292.2.fasta	0.64514	0.05214				0.032237
872294.5.fasta	0.340161	0.0519037				0.032219
360398.2.fasta	0.334686	0.0517987				0.032002
334856.3.fasta	0.62386	0.0507591				0.031977
346883.2.fasta	0.379726	0.0507127				0.031931
431893.2.fasta	0.654291	0.0505174				0.031806
235266.2.fasta	0.3694	0.0504527				0.03161
446807.2.fasta	0.636402	0.0503881				0.03157
320835.3.fasta	0.34077	0.0503607				0.031419
151599.3.fasta	0.631598	0.0503495				0.031352
397353.2.fasta	0.641902	0.0502685				0.031182
53369.2.fasta	0.341031	0.0502127				0.031081
389469.2.fasta	0.642647	0.0501298				0.031074
387905.2.fasta	0.341565	0.0494887				0.030992
260373.1.fasta	0.634384	0.0494506				0.030891
12024.2.fasta	0.492024	0.0492288				0.0307
871584.5.fasta	0.312556	0.0492013				0.030695
151538.1.fasta	0.358762	0.0490118				0.030608
244310.1.fasta	0.63639	0.048841				0.030448
445517.2.fasta	0.33458	0.0488324				0.030308
326036.2.fasta	0.342794	0.0487715				0.03007
467481.2.fasta	0.639315	0.0487664				0.029743
298338.3.fasta	0.373208	0.0486642				0.029704
693629.2.fasta	0.376954	0.0486241				0.029679
981330.3.fasta	0.695736	0.048534				0.029591
209052.1.fasta	0.633311	0.0481533				0.029203
31532.1.fasta	0.34512	0.0480924				0.029168
148943.1.fasta	0.424939	0.048023				0.027949
494269.2.fasta	0.347244	0.0478103				0.027505
309181.2.fasta	0.39128	0.0476417				0.027392
747763.5.fasta	0.662539	0.0476284				0.026985
320837.3.fasta	0.337302	0.047512				0.026973
63118.1.fasta	0.343453	0.0472993				0.02688
205872.1.fasta	0.653777	0.047272				0.02687
10872.1.fasta	0.453626	0.0470198				0.026857
10871.1.fasta	0.614914	0.0470195				0.026762
213769.2.fasta	0.33884	0.0468003				0.026523
186153.1.fasta	0.334722	0.0467374				0.02646
83129.2.fasta	0.346801	0.0465161				0.026443
387910.2.fasta	0.34738	0.0464787				0.026427
430796.2.fasta	0.330404	0.0463032				0.026426
546184.2.fasta	0.675665	0.0460934				0.026377
387908.2.fasta	0.345857	0.046048				0.026363
320834.3.fasta	0.343022	0.0459896				0.026336
331627.2.fasta	0.608816	0.0458312				0.026332
280701.3.fasta	0.63172	0.0458123				0.026236
665883.2.fasta	0.346995	0.0457848				0.026199
6666666.3737.fasta	0.675258	0.0457277				0.026112
213775.2.fasta	0.349434	0.0456926				0.026043
445516.2.fasta	0.3359	0.0456112				0.026023
591487.2.fasta	0.674839	0.0456043				0.026014
575610.2.fasta	0.332459	0.0455744				0.02601
373413.2.fasta	0.673352	0.0452358				0.025976
505291.2.fasta	0.64329	0.0451675				0.025968
10708.1.fasta	0.643402	0.0451364				0.025872
6666666.3754.fasta	0.675639	0.0450646				0.025868
320839.3.fasta	0.334591	0.0450558				0.025779
59506.3.fasta	0.345866	0.0450452				0.025615
12345.1.fasta	0.346538	0.0450187				0.025604
575608.2.fasta	0.349128	0.0449426				0.025474
6666666.3791.fasta	0.674777	0.0448913				0.025461
487152.2.fasta	0.343264	0.044885				0.025338
6666666.3729.fasta	0.675409	0.0448234				0.025326
6666666.3869.fasta	0.674382	0.0444125				0.024881
320844.3.fasta	0.352391	0.0443555				0.024836
326037.2.fasta	0.34899	0.0443413				0.024682
320843.3.fasta	0.350597	0.0443122				0.02468
287412.2.fasta	0.349666	0.0440748				0.024574
186152.1.fasta	0.333467	0.0440711				0.024528
399185.2.fasta	0.349084	0.0440488				0.024427
10747.1.fasta	0.388306	0.0437804				0.024423
320842.3.fasta	0.350078	0.0437051				0.024421
225067.3.fasta	0.410408	0.0436971				0.02432
106284.1.fasta	0.354309	0.0435682				0.024192
6666666.3739.fasta	0.670777	0.0435323				0.024182
6666666.3768.fasta	0.674859	0.0434448				0.023647
398839.2.fasta	0.346753	0.043352				0.022826
39803.2.fasta	0.485409	0.043022				0.022131
10867.1.fasta	0.405492	0.0429127				0.021579
12360.1.fasta	0.344968	0.0428942				0.021362
665887.2.fasta	0.350253	0.0428601				0.021237
215167.2.fasta	0.334633	0.0427748				0.021207
10719.1.fasta	0.636186	0.0425922				0.021119
665886.2.fasta	0.351465	0.0424911				0.02093
181007.3.fasta	0.347254	0.0424639				0.020711
12021.1.fasta	0.46529	0.0424338				0.020676
330396.2.fasta	0.350995	0.0424184				0.020597
320847.3.fasta	0.355337	0.0423212				0.020525
320850.3.fasta	0.359576	0.0420547				0.019939
405947.2.fasta	0.355648	0.0419359				0.019929
762906.5.fasta	0.520831	0.0417431				0.019717
40521.1.fasta	0.361072	0.0417101				0.019256
270161.2.fasta	0.483996	0.0415819				0.019225
315953.2.fasta	0.412259	0.0414639				0.019115
439809.2.fasta	0.617392	0.0414413				0.018422
279280.3.fasta	0.651939	0.0413682				0.018137
348137.2.fasta	0.615391	0.0412648				0.017784
105154.1.fasta	0.40938	0.0412587				0.01753
31537.1.fasta	0.363071	0.0412393				0.017324
74336.1.fasta	0.487313	0.0410456				0.017254
6666666.3784.fasta	0.667943	0.0408383				0.016617
313629.2.fasta	0.4117	0.0406456				0.016118
151537.1.fasta	0.356789	0.0405867				0.016085
225588.1.fasta	0.627621	0.0405783				0.015951
561996.2.fasta	0.667722	0.0404382				0.015869
767806.3.fasta	0.345766	0.0402633				0.01586
379501.2.fasta	0.356304	0.0401826				0.015542
330399.2.fasta	0.354973	0.0399612				0.015348
117575.1.fasta	0.406222	0.0398665				0.01529
263374.1.fasta	0.654384	0.039824				0.015174
372457.2.fasta	0.392108	0.0397487				0.01505
6666666.3880.fasta	0.618714	0.0396862				0.014726
347966.2.fasta	0.352642	0.0396644				0.014668
345922.2.fasta	0.34945	0.0395652				0.014655
6666666.4038.fasta	0.618288	0.0394973				0.014195
320848.3.fasta	0.354699	0.039491				0.01403
320849.3.fasta	0.357215	0.0393732				0.013854
35345.1.fasta	0.353784	0.0391415				0.013829
205868.1.fasta	0.613038	0.0391304				0.013303
6666666.3893.fasta	0.618839	0.0391236				0.013156
10868.1.fasta	0.437071	0.0391008				0.012669
263375.1.fasta	0.654018	0.0390977				0.012413
373408.2.fasta	0.615299	0.0390552				0.012235
139872.2.fasta	0.346967	0.0390337				0.012213
194699.1.fasta	0.654084	0.0389669				0.012176
423476.2.fasta	0.374818	0.038891				0.011889
36343.2.fasta	0.359901	0.0387883				0.011753
90963.1.fasta	0.409803	0.03878				0.011652
320845.3.fasta	0.357238	0.0387624				0.011209
320846.3.fasta	0.353745	0.0386439				0.011104
6666666.3782.fasta	0.612392	0.0386195				0.011057
673832.2.fasta	0.340135	0.0385983				0.010624
373412.2.fasta	0.614178	0.038565				0.010531
134554.1.fasta	0.577351	0.0384118				0.010474
663241.2.fasta	0.343889	0.0383348				0.010469
374525.2.fasta	0.357087	0.0382953				0.010468
10869.1.fasta	0.427195	0.0382387				0.010067
979525.3.fasta	0.370733	0.0382156				0.01002
359962.2.fasta	0.351296	0.038104				0.009947
329852.2.fasta	0.521154	0.0380994				0.009833
6666666.3867.fasta	0.617863	0.0380446				0.009825
347962.3.fasta	0.352213	0.0378201				0.009763
685506.5.fasta	0.61491	0.037693				0.009675
39804.2.fasta	0.512428	0.0376635				0.009647
910473.3.fasta	0.637072	0.0376248				0.009513
114416.1.fasta	0.358362	0.0376149				0.00945
320840.3.fasta	0.351137	0.0375901				0.009366
644524.2.fasta	0.662021	0.0375317				0.009325
40522.2.fasta	0.366841	0.0375302				0.009025
6666666.3776.fasta	0.617584	0.0374518				0.008918
466051.2.fasta	0.577618	0.0374418				0.00888
6666666.3759.fasta	0.617524	0.0373894				0.008832
466052.2.fasta	0.577587	0.037352				0.008827
31754.1.fasta	0.349749	0.037303				0.008815
330397.2.fasta	0.362119	0.0372886				0.008676
354260.3.fasta	0.353673	0.0370203				0.008548
546182.2.fasta	0.611282	0.0368817				0.008546
764562.3.fasta	0.36377	0.0368317				0.0085
40523.2.fasta	0.359289	0.0368269				0.008448
329855.2.fasta	0.502572	0.0367875				0.008269
563119.2.fasta	0.617725	0.0367086				0.008201
260149.5.fasta	0.371957	0.0366752				0.008121
10855.1.fasta	0.320516	0.036548				0.008101
910475.3.fasta	0.622799	0.0364915				0.008059
151536.1.fasta	0.353229	0.0364536				0.008048
557289.2.fasta	0.628697	0.036275				0.008029
75725.1.fasta	0.508239	0.0361671				0.007571
205875.1.fasta	0.65384	0.0361529				0.007545
673835.2.fasta	0.346071	0.0360554				0.007239
198538.1.fasta	0.378016	0.0358569				0.007045
330395.2.fasta	0.360394	0.0355744				0.006883
910474.3.fasta	0.632252	0.0355667				0.006858
673837.2.fasta	0.345462	0.0355244				0.006843
292443.3.fasta	0.443788	0.0354174				0.00657
320836.3.fasta	0.369161	0.0353645				0.006522
347324.2.fasta	0.620832	0.0353469				0.006397
632112.2.fasta	0.373982	0.0352611				0.006165
6666666.3810.fasta	0.610549	0.0351652				0.006164
151535.1.fasta	0.351877	0.0350836				0.006023
12018.1.fasta	0.47865	0.0349695				0.006019
35241.1.fasta	0.362219	0.0349539				0.00589
563122.2.fasta	0.612631	0.0349134				0.005837
70203.1.fasta	0.434227	0.0347895				0.005797
6666666.3760.fasta	0.611696	0.0346259				0.005758
10753.2.fasta	0.373167	0.0345383				0.005584
670252.3.fasta	0.567568	0.0344453				0.005456
242527.1.fasta	0.653063	0.0344043				0.004876
442493.2.fasta	0.357375	0.0343803				0.004815
335797.2.fasta	0.606803	0.0342793				0.004231
764561.3.fasta	0.37296	0.0341439				0.004148
6666666.3774.fasta	0.613693	0.0341226				0.004125
128710.2.fasta	0.403685	0.0340733				0.004078
181604.1.fasta	0.437228	0.0340532				0.004068
563123.2.fasta	0.612192	0.0339503				0.004056
382685.2.fasta	0.370991	0.0338166				0.003919
205876.1.fasta	0.609016	0.033728				0.003678
565140.2.fasta	0.378017	0.0335521				0.003626
753085.3.fasta	0.607199	0.0334989				0.003436
552525.2.fasta	0.364229	0.0334754				0.003259
320841.3.fasta	0.359913	0.0333294				0.003192
6666666.3842.fasta	0.611277	0.0333137				0.003124
10778.1.fasta	0.376597	0.0331316				0.0031
43685.1.fasta	0.354603	0.0329592				0.003095
6666666.3871.fasta	0.610229	0.0327843				0.003079
12017.1.fasta	0.513846	0.0326669				0.003026
431894.2.fasta	0.630508	0.0326418				0.002999
374526.2.fasta	0.357336	0.0323369				0.002921
264729.3.fasta	0.628606	0.0322924				0.002859
646413.2.fasta	0.380298	0.032136				0.002843
139870.2.fasta	0.351406	0.0320616				0.002822
431891.2.fasta	0.604491	0.0320018				0.002786
255131.1.fasta	0.606835	0.0318867				0.002756
644007.2.fasta	0.394903	0.0317645				0.002694
194948.1.fasta	0.496943	0.0315854				0.002673
99179.2.fasta	0.386276	0.0315161				0.002655
673839.2.fasta	0.377774	0.0315157				0.002626
12417.1.fasta	0.355715	0.0313157				0.002617
154784.1.fasta	0.438613	0.0312287				0.002552
359961.2.fasta	0.352583	0.03122				0.002541
12390.1.fasta	0.355091	0.0312009				0.002527
374527.2.fasta	0.359886	0.0311838				0.002416
578234.2.fasta	0.370422	0.031074				0.002384
374529.2.fasta	0.358312	0.0308666				0.002333
35343.1.fasta	0.626223	0.0308527				0.002281
223524.1.fasta	0.433705	0.0306707				0.00224
642111.2.fasta	0.429553	0.0306594
194949.1.fasta	0.499011	0.0304738
173824.1.fasta	0.453747	0.0304288
560178.2.fasta	0.392587	0.0303428
499235.2.fasta	0.589782	0.0300515
393598.2.fasta	0.617449	0.0300185
338103.2.fasta	0.447259	0.0296012
238854.4.fasta	0.378205	0.0294509
198539.1.fasta	0.382548	0.029441
198540.1.fasta	0.380255	0.0294011
10756.2.fasta	0.399907	0.0293918
225726.1.fasta	0.34724	0.0293288
386793.2.fasta	0.609021	0.0293195
10879.1.fasta	0.558162	0.0292892
173707.1.fasta	0.385707	0.0292826
33771.1.fasta	0.558465	0.0292278
338110.2.fasta	0.443521	0.0291889
180504.1.fasta	0.61192	0.0291781
444474.2.fasta	0.35974	0.0290359
475178.2.fasta	0.336889	0.0289492
222645.1.fasta	0.557933	0.0287383
198542.1.fasta	0.38083	0.0287295
338101.2.fasta	0.452703	0.0286319
128708.3.fasta	0.388535	0.0284987
376758.2.fasta	0.540233	0.0284404
12402.1.fasta	0.396413	0.0284237
198541.1.fasta	0.385731	0.0283442
338109.2.fasta	0.450877	0.0282277
180816.1.fasta	0.493888	0.0281798
77048.1.fasta	0.463062	0.0279849
338105.2.fasta	0.449407	0.0277389
261665.2.fasta	0.483536	0.0277231
338102.2.fasta	0.450338	0.0275734
489828.2.fasta	0.448253	0.027554
112023.1.fasta	0.387272	0.0274942
318596.2.fasta	0.481826	0.027374
537874.2.fasta	0.405075	0.0273361
338106.2.fasta	0.44831	0.0272439
64186.1.fasta	0.37566	0.0271235
338107.2.fasta	0.449347	0.0267993
235201.3.fasta	0.393549	0.0267937
77775.1.fasta	0.390064	0.0265303
338131.2.fasta	0.462794	0.0264531
633135.2.fasta	0.389857	0.0263294
318595.2.fasta	0.483215	0.0262525
504501.3.fasta	0.540999	0.0261452
6666666.3808.fasta	0.63424	0.0258063
197310.2.fasta	0.353245	0.0257987
318593.2.fasta	0.482558	0.0257436
341698.2.fasta	0.381097	0.0257309
10665.1.fasta	0.352978	0.0257202
318594.2.fasta	0.482292	0.0256088
198543.1.fasta	0.397136	0.0255631
627087.2.fasta	0.36718	0.0254498
511969.2.fasta	0.457528	0.0253494
157924.1.fasta	0.391502	0.025347
45406.2.fasta	0.353403	0.0253191
641487.2.fasta	0.343843	0.0252814
225725.1.fasta	0.376887	0.0252763
205879.1.fasta	0.613746	0.0252208
10658.1.fasta	0.480871	0.0251733
10693.2.fasta	0.35253	0.0251082
330398.2.fasta	0.408185	0.0250971
546806.2.fasta	0.647426	0.0249432
440250.2.fasta	0.464797	0.0248054
307240.3.fasta	0.400701	0.0247639
445696.3.fasta	0.381152	0.0247209
180503.1.fasta	0.435031	0.0247176
388452.2.fasta	0.351108	0.0246483
268746.6.fasta	0.355058	0.0246447
120086.1.fasta	0.545048	0.0246155
546803.2.fasta	0.647202	0.0245861
10685.2.fasta	0.399647	0.0245291
28358.2.fasta	0.561591	0.0245198
513550.2.fasta	0.386512	0.0243102
120574.1.fasta	0.384118	0.0242552
403905.2.fasta	0.396507	0.0242378
546807.2.fasta	0.648286	0.0241891
546808.2.fasta	0.647767	0.0240576
663554.2.fasta	0.646029	0.0239104
6666666.3888.fasta	0.647319	0.0239034
6666666.3761.fasta	0.646848	0.0237548
6666666.3770.fasta	0.646478	0.0237235
373404.2.fasta	0.647354	0.0237091
6666666.3813.fasta	0.646515	0.0237084
476523.2.fasta	0.623318	0.0236689
6666666.3805.fasta	0.648373	0.023668
90410.1.fasta	0.390722	0.023653
6666666.3720.fasta	0.647698	0.0236433
31535.1.fasta	0.578042	0.0236234
6666666.3730.fasta	0.646808	0.0236034
236750.1.fasta	0.397188	0.023602
363555.2.fasta	0.368969	0.0235894
338137.2.fasta	0.461385	0.0235027
6666666.3911.fasta	0.646662	0.0234694
413066.2.fasta	0.416114	0.0234358
445688.3.fasta	0.370864	0.0233695
484896.2.fasta	0.622784	0.0233555
338134.2.fasta	0.457952	0.0233219
1002725.3.fasta	0.355674	0.0232877
10844.1.fasta	0.443372	0.0232305
6666666.3845.fasta	0.647818	0.0232009
139871.2.fasta	0.364008	0.0231966
72638.1.fasta	0.38274	0.0231447
6666666.3885.fasta	0.647597	0.0231168
627480.2.fasta	0.628685	0.0231005
338119.2.fasta	0.444486	0.0230794
338111.2.fasta	0.444857	0.023079
338133.2.fasta	0.458132	0.0230612
10843.1.fasta	0.456876	0.0230462
338135.2.fasta	0.464641	0.0229844
10680.1.fasta	0.495268	0.0229633
386792.2.fasta	0.623171	0.0229108
141904.3.fasta	0.44623	0.0229087
338132.2.fasta	0.460821	0.0228926
338120.2.fasta	0.445043	0.0228389
504553.3.fasta	0.539718	0.0227626
496396.2.fasta	0.62182	0.0226621
10849.1.fasta	0.451782	0.0226488
338123.2.fasta	0.443743	0.0226406
444861.3.fasta	0.406166	0.0226084
445700.3.fasta	0.378494	0.0225023
338136.2.fasta	0.463194	0.0224796
310953.3.fasta	0.459387	0.0224786
338118.2.fasta	0.450798	0.0224062
338129.2.fasta	0.462996	0.0222887
6666666.3806.fasta	0.613452	0.0222672
338112.2.fasta	0.443557	0.0222428
10704.2.fasta	0.589517	0.0222313
10845.2.fasta	0.452084	0.0222253
338116.2.fasta	0.444857	0.0222161
338124.2.fasta	0.445414	0.0221724
204270.1.fasta	0.622969	0.0220728
10848.1.fasta	0.449171	0.0218944
338127.2.fasta	0.46083	0.0218269
877240.4.fasta	0.408209	0.0218079
338130.2.fasta	0.459566	0.0217982
338125.2.fasta	0.447271	0.0217121
555603.2.fasta	0.63843	0.021712
338113.2.fasta	0.447271	0.0217095
338121.2.fasta	0.445785	0.0215437
342564.2.fasta	0.421046	0.0214717
338128.2.fasta	0.460289	0.0214627
6666666.3802.fasta	0.637603	0.021423
365048.2.fasta	0.443791	0.0214204
268747.4.fasta	0.367435	0.0213303
338114.2.fasta	0.444671	0.0213018
338115.2.fasta	0.448385	0.0212985
444862.3.fasta	0.376443	0.0212965
338117.2.fasta	0.448756	0.0212059
78541.1.fasta	0.38556	0.0211265
338126.2.fasta	0.445517	0.0211164
6666666.3803.fasta	0.639318	0.0211118
6666666.3798.fasta	0.638367	0.0210751
10717.1.fasta	0.426904	0.0210629
6666666.3862.fasta	0.63846	0.0210412
663557.2.fasta	0.638722	0.0210114
6666666.3892.fasta	0.638736	0.020913
85154.1.fasta	0.382612	0.020875
338122.2.fasta	0.443929	0.0208117
6666666.13472.fasta	0.639434	0.0207586
6666666.3848.fasta	0.63877	0.0207052
376821.2.fasta	0.415809	0.0205866
260120.2.fasta	0.636991	0.0205078
6666666.3741.fasta	0.607317	0.0205069
540066.2.fasta	0.635724	0.0205033
444878.3.fasta	0.395702	0.0204985
551790.2.fasta	0.617377	0.0204874
10847.1.fasta	0.447642	0.0203319
682370.2.fasta	0.393948	0.0203174
6666666.3797.fasta	0.636305	0.0202741
6666666.3853.fasta	0.637558	0.0202225
6666666.3819.fasta	0.607907	0.0202082
6666666.3811.fasta	0.637523	0.0201317
540065.2.fasta	0.637125	0.0201151
338108.2.fasta	0.458649	0.0200566
6666666.3740.fasta	0.636879	0.02002
390978.2.fasta	0.41567	0.0200123
6666666.3878.fasta	0.636487	0.0199865
538979.2.fasta	0.556397	0.0199619
6666666.3812.fasta	0.636371	0.0199508
448384.2.fasta	0.404992	0.0199488
50948.1.fasta	0.404419	0.0199447
6666666.3719.fasta	0.636499	0.0198612
127509.3.fasta	0.456623	0.0198272
127511.3.fasta	0.456748	0.0198272
762660.3.fasta	0.363662	0.0196866
576791.2.fasta	0.388938	0.019684
347328.2.fasta	0.644635	0.0196742
489829.2.fasta	0.452242	0.0195894
338138.2.fasta	0.457949	0.0195767
540064.2.fasta	0.63387	0.019552
396034.2.fasta	0.448495	0.0195148
340435.2.fasta	0.45953	0.0195074
6666666.13470.fasta	0.635318	0.0195062
294382.3.fasta	0.417405	0.0194635
127508.1.fasta	0.472355	0.019417
546183.2.fasta	0.62917	0.0194145
373403.2.fasta	0.629365	0.0193275
205869.1.fasta	0.631152	0.0193165
576789.2.fasta	0.405124	0.0192899
6666666.3715.fasta	0.634481	0.0192366
462590.2.fasta	0.64262	0.0192365
157239.1.fasta	0.399359	0.0192336
459845.2.fasta	0.397856	0.0191989
6666666.3841.fasta	0.6428	0.0191183
6666666.3787.fasta	0.636393	0.0191033
338140.2.fasta	0.450784	0.0190629
6666666.3779.fasta	0.62962	0.0190554
540067.2.fasta	0.634252	0.019055
83201.1.fasta	0.445266	0.0190063
6666666.3855.fasta	0.607936	0.018922
6666666.3712.fasta	0.634357	0.0188685
6666666.3757.fasta	0.638066	0.0188004
306323.3.fasta	0.40151	0.0186789
6666666.3857.fasta	0.630174	0.0186452
260121.2.fasta	0.632459	0.018445
6666666.3883.fasta	0.629579	0.0184323
546185.2.fasta	0.628407	0.0184255
6666666.3721.fasta	0.64182	0.0184138
6666666.3849.fasta	0.629224	0.0184047
6666666.3837.fasta	0.628537	0.0184038
6666666.3864.fasta	0.640465	0.0183878
693582.2.fasta	0.589143	0.0183024
546805.2.fasta	0.65436	0.0182952
445686.3.fasta	0.391162	0.0182863
169683.1.fasta	0.368332	0.0182619
6666666.3709.fasta	0.628572	0.0182276
6666666.3789.fasta	0.639818	0.0182229
857312.3.fasta	0.414245	0.018203
146269.2.fasta	0.442796	0.0181966
6666666.3804.fasta	0.629688	0.0180764
6666666.3809.fasta	0.640414	0.0180588
6666666.3763.fasta	0.630077	0.0179921
52979.1.fasta	0.430606	0.0179574
445685.3.fasta	0.399622	0.0179307
555387.2.fasta	0.411203	0.0177893
683735.2.fasta	0.424426	0.0175588
445684.3.fasta	0.412509	0.0173901
12353.1.fasta	0.376558	0.0170789
447909.2.fasta	0.447862	0.0170253
6666666.3839.fasta	0.645297	0.0169751
1026955.3.fasta	0.397451	0.0168974
10690.1.fasta	0.400062	0.016886
230158.1.fasta	0.424558	0.0168835
261726.2.fasta	0.569521	0.0168137
458639.2.fasta	0.417953	0.0167617
504346.2.fasta	0.562639	0.0167578
445683.3.fasta	0.41107	0.0167301
444859.3.fasta	0.411376	0.0166716
10724.1.fasta	0.437044	0.016581
469660.2.fasta	0.408892	0.0164238
6666666.3765.fasta	0.589179	0.0164019
28369.1.fasta	0.635298	0.0162988
540068.2.fasta	0.632629	0.0160595
373415.2.fasta	0.568516	0.0159665
482058.2.fasta	0.58021	0.0159063
242861.1.fasta	0.606541	0.015838
686439.2.fasta	0.570074	0.0156151
232237.1.fasta	0.520384	0.0155993
227470.1.fasta	0.427789	0.0155876
562742.3.fasta	0.578812	0.0154818
279281.3.fasta	0.445922	0.0152935
6666666.3790.fasta	0.587807	0.0152592
879630.3.fasta	0.429968	0.0152168
10677.1.fasta	0.520549	0.0149832
444860.3.fasta	0.404258	0.0149277
279530.3.fasta	0.544526	0.0148974
6666666.3861.fasta	0.587932	0.0148006
382359.2.fasta	0.40634	0.014766
674081.2.fasta	0.540156	0.0147624
861047.5.fasta	0.588349	0.0147454
6666666.3840.fasta	0.608726	0.0147289
645664.3.fasta	0.404449	0.0147086
707757.5.fasta	0.418314	0.0146482
593131.7.fasta	0.53449	0.014588
6666666.3823.fasta	0.625762	0.0144705
59241.3.fasta	0.403373	0.014468
665033.2.fasta	0.517604	0.0143525
75320.1.fasta	0.425993	0.0141714
6666666.3769.fasta	0.609543	0.014163
205880.1.fasta	0.573132	0.0141109
400567.2.fasta	0.518027	0.0140378
293178.2.fasta	0.395126	0.0137725
470314.2.fasta	0.519025	0.0137297
697227.5.fasta	0.395906	0.0134228
700939.3.fasta	0.403332	0.0134188
879628.3.fasta	0.412973	0.0133916
576790.2.fasta	0.395151	0.0133726
161736.1.fasta	0.552114	0.0133531
338473.2.fasta	0.495021	0.0132761
564886.2.fasta	0.511148	0.0131983
233894.4.fasta	0.410398	0.013138
127507.1.fasta	0.451617	0.0130885
760732.3.fasta	0.390059	0.0128485
12348.2.fasta	0.478173	0.0128265
279383.3.fasta	0.62122	0.0128014
67571.2.fasta	0.438862	0.0127286
399183.2.fasta	0.435609	0.0126715
438482.2.fasta	0.549704	0.0125481
329381.8.fasta	0.435211	0.0125367
658401.2.fasta	0.523008	0.0125209
496874.2.fasta	0.4549	0.0125146
31757.1.fasta	0.622579	0.012514
437329.2.fasta	0.562941	0.0123851
347325.2.fasta	0.535594	0.012381
1002724.3.fasta	0.454077	0.0123353
245685.2.fasta	0.426797	0.0123199
279006.3.fasta	0.396725	0.0122994
337828.3.fasta	0.440007	0.0121839
6666666.3788.fasta	0.61573	0.0120599
373405.2.fasta	0.628816	0.0119718
310539.3.fasta	0.43963	0.0119066
6666666.3890.fasta	0.613309	0.0118509
709484.3.fasta	0.399184	0.0118106
6666666.3772.fasta	0.614272	0.0116951
6666666.3713.fasta	0.613582	0.0116829
347326.2.fasta	0.448933	0.0113747
10761.1.fasta	0.474682	0.0112944
6666666.3755.fasta	0.615458	0.0112798
207597.1.fasta	0.506181	0.0112717
6666666.3764.fasta	0.615334	0.011255
329254.2.fasta	0.510746	0.0112365
270673.3.fasta	0.453646	0.0110788
10726.1.fasta	0.392698	0.011035
6666666.3710.fasta	0.597968	0.0109578
942165.3.fasta	0.562712	0.0108226
115987.1.fasta	0.438807	0.0108025
373126.3.fasta	0.508263	0.0108013
321023.5.fasta	0.439134	0.0107731
491003.2.fasta	0.399005	0.0107461
355246.2.fasta	0.442827	0.010737
760939.3.fasta	0.400278	0.010688
482822.2.fasta	0.518835	0.0106806
196242.1.fasta	0.506076	0.0106611
563769.2.fasta	0.509148	0.0104353
6666666.3728.fasta	0.599598	0.010394
136084.1.fasta	0.461602	0.0103745
273133.2.fasta	0.49327	0.010314
70734.2.fasta	0.488975	0.0101999
10661.1.fasta	0.421669	0.0101411
493906.2.fasta	0.488924	0.0100131
12355.1.fasta	0.455525	0.00996707
254397.2.fasta	0.510533	0.00990681
977927.3.fasta	0.393854	0.00974282
151528.1.fasta	0.532086	0.00970157
12407.1.fasta	0.528267	0.00969239
194701.2.fasta	0.524886	0.00965785
37554.1.fasta	0.497861	0.00955084
753084.3.fasta	0.544738	0.00952403
343516.2.fasta	0.48972	0.00941774
624134.2.fasta	0.547221	0.00937506
340054.2.fasta	0.429102	0.00933742
561997.2.fasta	0.596744	0.0092661
543153.2.fasta	0.562858	0.0092539
373411.2.fasta	0.596632	0.00921126
563121.2.fasta	0.57337	0.00913143
528321.2.fasta	0.597293	0.00911596
255431.1.fasta	0.514854	0.0090686
561998.2.fasta	0.595538	0.00902507
128975.2.fasta	0.515554	0.00894721
925986.3.fasta	0.438302	0.00886258
557393.2.fasta	0.438127	0.00885851
6666666.3815.fasta	0.596778	0.00885236
673375.2.fasta	0.545817	0.00871922
155148.1.fasta	0.466877	0.00869878
373410.2.fasta	0.59711	0.00868834
641832.2.fasta	0.491088	0.00860383
101570.3.fasta	0.485928	0.00834388
97081.1.fasta	0.49913	0.00828385
10710.1.fasta	0.498577	0.00824572
6666666.3879.fasta	0.595669	0.00820979
561999.2.fasta	0.596119	0.00815499
215158.1.fasta	0.508482	0.00815448
51369.1.fasta	0.448895	0.00815177
172667.1.fasta	0.445737	0.00807234
268748.3.fasta	0.387569	0.00805932
551895.2.fasta	0.461046	0.00803993
129861.2.fasta	0.510981	0.00803019
590739.2.fasta	0.474021	0.00795648
582345.3.fasta	0.547938	0.00788645
129862.2.fasta	0.510951	0.0077378
988656.3.fasta	0.581644	0.00769267
103216.1.fasta	0.517226	0.00767203
6666666.3846.fasta	0.559982	0.00765656
414970.2.fasta	0.491164	0.00761146
424716.2.fasta	0.461255	0.00760822
10730.1.fasta	0.493676	0.00760194
925984.3.fasta	0.473297	0.00755171
47049.2.fasta	0.486421	0.0074581
200913.2.fasta	0.470904	0.00727383
10752.2.fasta	0.41304	0.00725492
29252.1.fasta	0.530858	0.00722058
347329.2.fasta	0.549436	0.00720809
489779.2.fasta	0.495039	0.00707397
669008.3.fasta	0.487319	0.00706258
581037.2.fasta	0.55593	0.00705217
10754.1.fasta	0.470808	0.00701296
221029.1.fasta	0.474306	0.00695236
379329.2.fasta	0.49067	0.00693941
384848.2.fasta	0.509188	0.0068916
55884.1.fasta	0.507687	0.00686784
417280.2.fasta	0.558931	0.00684176
538398.2.fasta	0.549282	0.00682488
40631.1.fasta	0.51172	0.00681664
867696.3.fasta	0.4522	0.00679051
549445.2.fasta	0.55469	0.00677555
532078.2.fasta	0.472658	0.00675789
655097.2.fasta	0.532182	0.00669743
194966.1.fasta	0.472275	0.00668036
227940.1.fasta	0.521056	0.00657918
549446.2.fasta	0.55617	0.0065785
582382.2.fasta	0.555822	0.00656406
344022.2.fasta	0.450531	0.00656308
369257.2.fasta	0.471891	0.00655975
197783.1.fasta	0.574159	0.00655854
714583.4.fasta	0.4706	0.00649698
743813.3.fasta	0.494882	0.00642142
348058.2.fasta	0.472638	0.00640919
979535.3.fasta	0.428579	0.00637473
532074.2.fasta	0.487769	0.00619778
322855.3.fasta	0.518881	0.00617742
10679.1.fasta	0.501682	0.00609451
10742.1.fasta	0.494834	0.00608085
329864.2.fasta	0.469851	0.0060622
644563.2.fasta	0.428033	0.00597695
173443.1.fasta	0.475233	0.00591935
198110.2.fasta	0.453444	0.00591745
347327.2.fasta	0.447833	0.00587633
490103.2.fasta	0.422738	0.00581782
10759.1.fasta	0.499005	0.00579511
260827.3.fasta	0.504851	0.00576773
10760.1.fasta	0.483987	0.00576447
260372.3.fasta	0.505583	0.0057439
532076.2.fasta	0.483896	0.0057176
529929.2.fasta	0.508644	0.00538911
175950.1.fasta	0.51015	0.00537382
655098.2.fasta	0.55019	0.00535586
110457.1.fasta	0.506313	0.0053189
329886.3.fasta	0.42612	0.00526361
187764.2.fasta	0.452473	0.00522823
637730.2.fasta	0.503981	0.00486874
188350.1.fasta	0.522273	0.00481742
484895.2.fasta	0.522477	0.00480604
103807.1.fasta	0.493506	0.00479054
10678.1.fasta	0.473112	0.00477809
194802.1.fasta	0.495197	0.00474714
490912.2.fasta	0.479152	0.00469869
418443.2.fasta	0.498383	0.00443999
532077.2.fasta	0.532479	0.00438006
490913.2.fasta	0.470399	0.00437539
665032.2.fasta	0.562774	0.00428653
10682.2.fasta	0.47411	0.00425893
293644.3.fasta	0.500809	0.0042583
227720.1.fasta	0.483158	0.00414234
526118.2.fasta	0.465409	0.00411442
866889.3.fasta	0.489262	0.00390131
451705.2.fasta	0.440227	0.00378153
979533.3.fasta	0.426774	0.00351553
674082.2.fasta	0.5237	0.00335709
424944.2.fasta	0.49852	0.00335488
532075.2.fasta	0.49944	0.00285102
344021.6.fasta	0.497758	0.00251062

## Sheet: Sheet5
Phage_subsystems	#of phages			Phage_subsystems	#of phages (kld>0.1)
Not in a subsystem	682			phage_experimental	13
Phage_capsid_proteins	535			not in a subsystem	12
Phage_replication	532			aclame_phage_replication	10
Phage_experimental	441			phage_integration_and_excision	8
Phage_head_and_packaging	437			phage_regulation_of_gene_expression	7
Phage_lysis_modules	390			phage_tail	6
ACLAME_Phage_tail	374			phage_capsid_proteins	5
zzRobE_test	365			aclame_phage_head	5
ACLAME_Phage_proteins_with_unknown_functions	335			phage_ribonucleotide_reductases	3
Phage_tail_proteins	317			phage_dna_synthesis	2
Phage_tail_fiber_proteins	302			phage_tail_fiber_proteins	2
Phage_integration_and_excision	291			transposases	2
Phage_tail	255			aclame_phage_recombination_and_repair	2
Phage_regulation_of_gene_expression	205			phage_photosynthesis	1
ACLAME_Phage_proteins_with_known_functions	198			phage_baseplate_proteins	1
ACLAME_Phage_head	137			aclame_phage_chromosome_partitioning_proteins	1
ACLAME_Phage_regulation_of_gene_expression	125			phage_dna_methyltransferases	1
ACLAME_Phage_recombination_and_repair	124			aclame_phage_cell_division_proteins	1
Phage_introns	119			phage_entry_and_exit	1
ACLAME_Phage_replication	107
Phage_baseplate_proteins	105
Phage_DNA_methyltransferases	98
Phage_ribonucleotide_reductases	77
Phage_entry_and_exit	69
Phage_DNA_synthesis	66
Phage_family_Microviridae	56
Phage_functions_that_need_a_home	53
Phage_integrases	50
ACLAME_Phage_lysis_modules	45
ACLAME_Phage_integration	43
ACLAME_Phage_DNA_methyltransferase	36
T4-like_phage_core_proteins	32
Phage_transcription_NEW	31
Phage_capsid_collection	30
ACLAME_Phage_introns	28
Phage_superinfection_exclusion	28
Phage_regulators_of_transcription	28
T4-like_non-cyanophage_core_proteins	26
Phage_neck_proteins	25
Phage_structural	24
ACLAME_Phage_Nin_genes	22
Phage_gene_expression	22
Transposases	20
Phage_cyanophage	17
Phage_Ea_cluster	17
ACLAME_Phage_nucleases	16
Phage_DNA_synthesis_NEW	15
ACLAME_Phage-encoded_toxins	15
ACLAME_Gene_transfer_agents_(GTA)	15
Phage_carbon_metabolism	15
Phage_nucleotide_metabolism	14
T7-like_non-cyanophage_core_proteins	14
Phage_Family_Inoviridae	14
Cholera_toxin	13
ACLAME_Plasmid_related	12
ACLAME_Tranposases_in_phage	12
T7-like_phage_core_proteins	12
ACLAME_Phage_chromosome_partitioning_proteins	11
T4-like_cyanophage_core_proteins	11
ACLAME_Phage_antitermination_proteins	10
Phage_nin_genes_-_N-independent_survival	10
Phage_family_Leviviridae	9
CBSS-Phage_terminase_neighborhood	8
CBSS-194948.1.peg.143	7
ACLAME_Phage_cell_division_proteins	7
ACLAME_Phage_ribonucleotide_reduction	6
Phage_coat	6
Phage_photosynthesis	6
ACLAME_Phage_PBSX_proteins	6
Shiga_toxin,_phage_encoded	5
Prophage_lysogenic_conversion_modules	5
r1t-like_streptococcal_phages	4
Staphylococcal_phi-Mu50B-like_prophages	4
ACLAME_Phage_chemotaxis_proteins	4
ACLAME_Phage_host_specificity_proteins	2
Glutathionylspermidine_and_Trypanothione	2
Hypothetical_DUF454	2
T7-like_cyanophage_core_proteins	1
Phage_biofilm-degrading_proteins_(depolymerases)	1
Phage_packaging_machinery	1
Galactosylceramide_and_Sulfatide_metabolism	1
Listeria_phi-A118-like_prophages	1
Phage_Dual_Exonuclease_Exclusion	1
Bacillus_subtilis_delta_6	1
Queuosine-Archaeosine_Biosynthesis	1
Staphylococcal_pathogenicity_islands_SaPI	1
Bacterial_Cell_Division_Kathy	1

## Sheet: Sheet6
Phage_id	GC	Capsid_Kld		Phage_id	GC	Phage_replication_Kld		Phage_id	GC	Phage_Head_Kld		Phage_id	GC	Phage_lysis_Kld		Phage_id	GC%	Not_in_subsys_kld
482822.2.fasta	0.5188	0.0391384		482822.2.fasta	0.5188	0.0159997		482822.2.fasta	0.5188	0.0999525		482822.2.fasta	0.5188	0.0646266		482822.2.fasta	51.88	0.0149203
128975.2.fasta	0.5156	0.0634516		263374.1.fasta	0.6544	0.0608243		128975.2.fasta	0.5156	0.126151		263374.1.fasta	0.6544	0.197602		263374.1.fasta	65.44	0.0578063
665032.2.fasta	0.5628	0.0233373		128975.2.fasta	0.5156	0.0251495		6666666.3837.fasta	0.6285	0.0439843		128975.2.fasta	0.5156	0.0302028		128975.2.fasta	51.56	0.0283386
180503.1.fasta	0.435	0.249096		665032.2.fasta	0.5628	0.00481274		665032.2.fasta	0.5628	0.00334025		320848.3.fasta	0.3547	0.0236452		6666666.3837.fasta	62.85	0.011127
320848.3.fasta	0.3547	0.0298472		180503.1.fasta	0.435	0.0330954		396034.2.fasta	0.4485	0.0811929		35343.1.fasta	0.6262	0.201107		665032.2.fasta	56.28	0.00588066
35343.1.fasta	0.6262	0.0210538		320848.3.fasta	0.3547	0.133347		6666666.3803.fasta	0.6393	0.0155975		396034.2.fasta	0.4485	0.0972161		543939.2.fasta	27.04	0.0982928
396034.2.fasta	0.4485	0.0281227		396034.2.fasta	0.4485	0.0490146		6666666.3759.fasta	0.6175	0.0707761		379329.2.fasta	0.4907	0.058706		180503.1.fasta	43.5	0.145997
90963.1.fasta	0.4098	0.0341901		6666666.3803.fasta	0.6393	0.0308418		6666666.3729.fasta	0.6754	0.0501099		665883.2.fasta	0.347	0.046432		320848.3.fasta	35.47	0.0668231
665883.2.fasta	0.347	0.042564		379329.2.fasta	0.4907	0.028458		329886.3.fasta	0.4261	0.0189523		329886.3.fasta	0.4261	0.105833		35343.1.fasta	62.62	0.124514
329886.3.fasta	0.4261	0.0363608		6666666.3729.fasta	0.6754	0.0607364		466052.2.fasta	0.5776	0.0459868		198110.2.fasta	0.4534	0.0415063		396034.2.fasta	44.85	0.0884738
466052.2.fasta	0.5776	0.0692895		665883.2.fasta	0.347	0.212383		668618.2.fasta	0.3399	0.0492718		668618.2.fasta	0.3399	0.0584583		6666666.3803.fasta	63.93	0.0182442
198110.2.fasta	0.4534	0.0157494		329886.3.fasta	0.4261	0.0161272		439809.2.fasta	0.6174	0.0894007		439809.2.fasta	0.6174	0.0517364		379329.2.fasta	49.07	0.0218491
439809.2.fasta	0.6174	0.0856358		466052.2.fasta	0.5776	0.0725264		6666666.3723.fasta	0.6651	0.0643443		85154.1.fasta	0.3826	0.0498812		6666666.3759.fasta	61.75	0.0264639
85154.1.fasta	0.3826	0.0346455		668618.2.fasta	0.3399	0.11995		85154.1.fasta	0.3826	0.0528618		232237.1.fasta	0.5204	0.0265008		6666666.3729.fasta	67.54	0.034575
28358.2.fasta	0.5616	0.0148189		439809.2.fasta	0.6174	0.259074		232237.1.fasta	0.5204	0.0525817		209052.1.fasta	0.6333	0.157623		665883.2.fasta	34.7	0.0640852
232237.1.fasta	0.5204	0.0529147		6666666.3723.fasta	0.6651	0.0765005		6666666.3778.fasta	0.6896	0.0773474		114416.1.fasta	0.3584	0.0692473		329886.3.fasta	42.61	0.0243373
674081.2.fasta	0.5402	0.0324185		85154.1.fasta	0.3826	0.0407371		674081.2.fasta	0.5402	0.104709		665033.2.fasta	0.5176	0.0681953		466052.2.fasta	57.76	0.0366819
209052.1.fasta	0.6333	0.0619669		28358.2.fasta	0.5616	0.0791721		209052.1.fasta	0.6333	0.0382252		254397.2.fasta	0.5105	0.0635224		198110.2.fasta	45.34	0.00901586
114416.1.fasta	0.3584	0.0352388		232237.1.fasta	0.5204	0.0175008		114416.1.fasta	0.3584	0.0732522		390978.2.fasta	0.4157	0.135066		668618.2.fasta	33.99	0.0853128
188350.1.fasta	0.5223	0.026282		6666666.3778.fasta	0.6896	0.0739967		188350.1.fasta	0.5223	0.0519465		129009.1.fasta	0.3348	0.0584106		439809.2.fasta	61.74	0.105495
10857.2.fasta	0.365	0.0730089		674081.2.fasta	0.5402	0.0359669		151539.1.fasta	0.3304	0.0750685		292029.3.fasta	0.3039	0.0443494		6666666.3723.fasta	66.51	0.0460685
254397.2.fasta	0.5105	0.044686		209052.1.fasta	0.6333	0.0390811		665033.2.fasta	0.5176	0.0256018		10724.1.fasta	0.437	0.14775		28358.2.fasta	56.16	0.0356441
390978.2.fasta	0.4157	0.0290095		114416.1.fasta	0.3584	0.0597726		254397.2.fasta	0.5105	0.112626		445517.2.fasta	0.3346	0.0585078		232237.1.fasta	52.04	0.0201002
74336.1.fasta	0.4873	0.0944942		188350.1.fasta	0.5223	0.0190298		74336.1.fasta	0.4873	0.0887937		180504.1.fasta	0.6119	0.198398		6666666.3778.fasta	68.96	0.0528493
445696.3.fasta	0.3812	0.0131095		665033.2.fasta	0.5176	0.0267366		129009.1.fasta	0.3348	0.0664955		663554.2.fasta	0.646	0.0388119		674081.2.fasta	54.02	0.0141681
129009.1.fasta	0.3348	0.056032		254397.2.fasta	0.5105	0.028055		292029.3.fasta	0.3039	0.0919356		205879.1.fasta	0.6137	0.0320559		209052.1.fasta	63.33	0.098441
292029.3.fasta	0.3039	0.0249882		390978.2.fasta	0.4157	0.0319269		942165.3.fasta	0.5627	0.0554788		12355.1.fasta	0.4555	0.0580562		114416.1.fasta	35.84	0.10774
10724.1.fasta	0.437	0.0143441		75590.1.fasta	0.2903	0.233202		10724.1.fasta	0.437	0.305566		40521.1.fasta	0.3611	0.207005		665033.2.fasta	51.76	0.0189125
445517.2.fasta	0.3346	0.0558791		445696.3.fasta	0.3812	0.0313697		444878.3.fasta	0.3957	0.0331974		154784.1.fasta	0.4386	0.764195		254397.2.fasta	51.05	0.0220163
444878.3.fasta	0.3957	0.00955785		222645.1.fasta	0.5579	0.0369453		6666666.3865.fasta	0.6645	0.0636944		233894.4.fasta	0.4104	0.06408		390978.2.fasta	41.57	0.0666687
180504.1.fasta	0.6119	0.0366333		129009.1.fasta	0.3348	0.0876969		180504.1.fasta	0.6119	0.10918		260120.2.fasta	0.637	0.0438196		75590.1.fasta	29.03	0.231246
77048.1.fasta	0.4631	0.0281402		292029.3.fasta	0.3039	0.0673539		270673.3.fasta	0.4536	0.0441422		260373.1.fasta	0.6344	0.15777		445696.3.fasta	38.12	0.02901
205879.1.fasta	0.6137	0.0455139		10724.1.fasta	0.437	0.0393529		6666666.3811.fasta	0.6375	0.0254279		205868.1.fasta	0.613	0.0540867		222645.1.fasta	55.79	0.0284685
10872.1.fasta	0.4536	0.310728		445517.2.fasta	0.3346	0.132935		663554.2.fasta	0.646	0.0538094		10717.1.fasta	0.4269	0.0337854		129009.1.fasta	33.48	0.27179
12355.1.fasta	0.4555	0.0415029		444878.3.fasta	0.3957	0.0241382		205879.1.fasta	0.6137	0.0393937		590739.2.fasta	0.474	0.0440228		292029.3.fasta	30.39	0.0653586
40521.1.fasta	0.3611	0.0185043		6666666.3865.fasta	0.6645	0.0743256		582345.3.fasta	0.5479	0.0367725		294382.3.fasta	0.4174	0.0558473		942165.3.fasta	56.27	0.0111684
154784.1.fasta	0.4386	0.093883		270673.3.fasta	0.4536	0.0238034		12355.1.fasta	0.4555	0.0565903		398839.2.fasta	0.3468	0.0661729		10724.1.fasta	43.7	0.0521711
233894.4.fasta	0.4104	0.0067936		6666666.3811.fasta	0.6375	0.0290968		233894.4.fasta	0.4104	0.0508266		344022.2.fasta	0.4505	0.139344		445517.2.fasta	33.46	0.0757789
260120.2.fasta	0.637	0.0511464		663554.2.fasta	0.646	0.0293978		977927.3.fasta	0.3939	0.0443447		70734.2.fasta	0.489	0.0972453		444878.3.fasta	39.57	0.0295975
205868.1.fasta	0.613	0.0879379		12355.1.fasta	0.4555	0.0327749		6666666.3726.fasta	0.6661	0.0492405		347327.2.fasta	0.4478	0.11696		6666666.3865.fasta	66.45	0.0439054
117575.1.fasta	0.4062	0.0346695		233894.4.fasta	0.4104	0.0187116		6666666.3874.fasta	0.6651	0.0624564		431893.2.fasta	0.6543	0.146458		270673.3.fasta	45.36	0.445863
10717.1.fasta	0.4269	0.0197124		6666666.3726.fasta	0.6661	0.0638731		260120.2.fasta	0.637	0.0260166		320832.3.fasta	0.2929	0.0724263		562742.3.fasta	57.88	0.0104235
590739.2.fasta	0.474	0.0157626		6666666.3874.fasta	0.6651	0.0754143		260373.1.fasta	0.6344	0.0323416		538398.2.fasta	0.5493	0.0515373		77048.1.fasta	46.31	0.0907833
294382.3.fasta	0.4174	0.0181572		260120.2.fasta	0.637	0.0419271		205868.1.fasta	0.613	0.0680891		12417.1.fasta	0.3557	0.0363755		6666666.3811.fasta	63.75	0.0141314
398839.2.fasta	0.3468	0.0486156		260373.1.fasta	0.6344	0.03702		6666666.3724.fasta	0.6653	0.0636944		230158.1.fasta	0.4246	0.0294967		663554.2.fasta	64.6	0.0165954
344022.2.fasta	0.4505	0.0212651		6666666.3724.fasta	0.6653	0.075703		10717.1.fasta	0.4269	0.0318766		172667.1.fasta	0.4457	0.117548		205879.1.fasta	61.37	0.0206655
70734.2.fasta	0.489	0.0208914		10717.1.fasta	0.4269	0.0419136		590739.2.fasta	0.474	0.0637819		343516.2.fasta	0.4897	0.040793		582345.3.fasta	54.79	0.00615614
347327.2.fasta	0.4478	0.194121		590739.2.fasta	0.474	0.0145077		294382.3.fasta	0.4174	0.0285779		576789.2.fasta	0.4051	0.0852917		233894.4.fasta	41.04	0.0346887
431893.2.fasta	0.6543	0.054604		294382.3.fasta	0.4174	0.013697		398839.2.fasta	0.3468	0.113994		322855.3.fasta	0.5189	0.0375917		977927.3.fasta	39.39	0.0170449
320832.3.fasta	0.2929	0.0845617		398839.2.fasta	0.3468	0.071913		347327.2.fasta	0.4478	0.0161226		50948.1.fasta	0.4044	0.0854153		6666666.3726.fasta	66.61	0.0520645
538398.2.fasta	0.5493	0.0292002		344022.2.fasta	0.4505	0.00794605		6666666.3769.fasta	0.6095	0.0244649		51369.1.fasta	0.4489	0.0476135		6666666.3874.fasta	66.51	0.044165
260827.3.fasta	0.5049	0.230227		70734.2.fasta	0.489	0.0254486		6666666.3800.fasta	0.653	0.0593077		551790.2.fasta	0.6174	0.0962233		260120.2.fasta	63.7	0.188178
12417.1.fasta	0.3557	0.0471722		347327.2.fasta	0.4478	0.0271824		431893.2.fasta	0.6543	0.0455719		64186.1.fasta	0.3757	0.0405991		260373.1.fasta	63.44	0.0655124
230158.1.fasta	0.4246	0.0515275		6666666.3769.fasta	0.6095	0.0310364		504501.3.fasta	0.541	0.0740402		329254.2.fasta	0.5107	0.0514284		205868.1.fasta	61.3	0.0414857
172667.1.fasta	0.4457	0.0290585		6666666.3800.fasta	0.653	0.0956036		6666666.3738.fasta	0.6657	0.0311671		10756.2.fasta	0.3999	0.0715832		6666666.3724.fasta	66.53	0.0453471
343516.2.fasta	0.4897	0.068175		320832.3.fasta	0.2929	0.165468		753084.3.fasta	0.5447	0.0311406		120574.1.fasta	0.3841	0.0450299		590739.2.fasta	47.4	0.0343638
576789.2.fasta	0.4051	0.0346637		538398.2.fasta	0.5493	0.00811702		12417.1.fasta	0.3557	0.0606327		197310.2.fasta	0.3532	0.0719277		294382.3.fasta	41.74	0.0904166
338102.2.fasta	0.4503	0.0852278		260827.3.fasta	0.5049	0.0134416		230158.1.fasta	0.4246	0.0505721		12353.1.fasta	0.3766	0.0670047		346881.2.fasta	36.85	0.0654169
50948.1.fasta	0.4044	0.0149251		12417.1.fasta	0.3557	0.0378543		172667.1.fasta	0.4457	0.0472761		347966.2.fasta	0.3526	0.030443		398839.2.fasta	34.68	0.0901093
83201.1.fasta	0.4453	0.298461		230158.1.fasta	0.4246	0.0256097		343516.2.fasta	0.4897	0.0777904		564886.2.fasta	0.5111	0.0915086		344022.2.fasta	45.05	0.0339024
641832.2.fasta	0.4911	0.0455316		343516.2.fasta	0.4897	0.0604993		576789.2.fasta	0.4051	0.0179387		12360.1.fasta	0.345	0.0238192		70734.2.fasta	48.9	0.0622618
318593.2.fasta	0.4826	0.0770263		576789.2.fasta	0.4051	0.0188661		322855.3.fasta	0.5189	0.0235456		197783.1.fasta	0.5742	0.0539067		347327.2.fasta	44.78	0.110221
51369.1.fasta	0.4489	0.00455532		322855.3.fasta	0.5189	0.00780825		1026955.3.fasta	0.3975	0.0504462		549446.2.fasta	0.5562	0.0465167		6666666.3769.fasta	60.95	0.0108031
551790.2.fasta	0.6174	0.0444073		6666666.3813.fasta	0.6465	0.0184838		6666666.3813.fasta	0.6465	0.0492453		546803.2.fasta	0.6472	0.0295195		6666666.3800.fasta	65.3	0.0534668
64186.1.fasta	0.3757	0.0355696		50948.1.fasta	0.4044	0.0242063		50948.1.fasta	0.4044	0.130257		341698.2.fasta	0.3811	0.0327518		431893.2.fasta	65.43	0.0748904
329254.2.fasta	0.5107	0.0518275		641832.2.fasta	0.4911	0.0226571		318593.2.fasta	0.4826	0.0452564		236750.1.fasta	0.3972	0.027671		320832.3.fasta	29.29	0.209522
10756.2.fasta	0.3999	0.114912		318593.2.fasta	0.4826	0.0381976		51369.1.fasta	0.4489	0.145175		665886.2.fasta	0.3515	0.048619		504501.3.fasta	54.1	0.0193981
120574.1.fasta	0.3841	0.0128968		51369.1.fasta	0.4489	0.015309		6666666.3765.fasta	0.5892	0.0335286		31535.1.fasta	0.578	0.133503		693629.2.fasta	37.7	0.0583962
197310.2.fasta	0.3532	0.0218627		551790.2.fasta	0.6174	0.0145834		6666666.3867.fasta	0.6179	0.126576		115987.1.fasta	0.4388	0.042814		979533.3.fasta	42.68	0.0071902
12353.1.fasta	0.3766	0.0133007		64186.1.fasta	0.3757	0.0334582		329254.2.fasta	0.5107	0.0293603		563121.2.fasta	0.5734	0.0276052		260827.3.fasta	50.49	0.0181857
347966.2.fasta	0.3526	0.039046		329254.2.fasta	0.5107	0.0194956		10756.2.fasta	0.3999	0.0344817		459845.2.fasta	0.3979	0.0719258		6666666.3738.fasta	66.57	0.0521279
564886.2.fasta	0.5111	0.043678		10756.2.fasta	0.3999	0.0621792		197310.2.fasta	0.3532	0.0240629		528321.2.fasta	0.5973	0.0292123		753084.3.fasta	54.47	0.00859871
12360.1.fasta	0.345	0.0581121		120574.1.fasta	0.3841	0.218781		12353.1.fasta	0.3766	0.100528		215167.2.fasta	0.3346	0.0655382		172667.1.fasta	44.57	0.0251785
190478.1.fasta	0.2838	0.0641565		197310.2.fasta	0.3532	0.0349405		347966.2.fasta	0.3526	0.0516704		373410.2.fasta	0.5971	0.0292123		343516.2.fasta	48.97	0.194971
268746.6.fasta	0.3551	0.0132424		12353.1.fasta	0.3766	0.0193056		564886.2.fasta	0.5111	0.112124		359961.2.fasta	0.3526	0.030443		576789.2.fasta	40.51	0.02135
197783.1.fasta	0.5742	0.0323471		347966.2.fasta	0.3526	0.117374		12360.1.fasta	0.345	0.0458977		673832.2.fasta	0.3401	0.076024		322855.3.fasta	51.89	0.0270008
549446.2.fasta	0.5562	0.0271608		564886.2.fasta	0.5111	0.0284629		190478.1.fasta	0.2838	0.12209		649688.2.fasta	0.6669	0.10939		346883.2.fasta	37.97	0.0605908
642111.2.fasta	0.4296	0.285604		12360.1.fasta	0.345	0.101684		6666666.3789.fasta	0.6398	0.0100593		205869.1.fasta	0.6312	0.0265911		1026955.3.fasta	39.75	0.0236715
310953.3.fasta	0.4594	0.0820588		190478.1.fasta	0.2838	0.0875658		268746.6.fasta	0.3551	0.0339457		386793.2.fasta	0.609	0.159554		6666666.3813.fasta	64.65	0.0185833
511969.2.fasta	0.4575	0.0739357		6666666.3789.fasta	0.6398	0.0323347		197783.1.fasta	0.5742	0.0281788		320122.2.fasta	0.2877	0.155356		50948.1.fasta	40.44	0.0468221
338117.2.fasta	0.4488	0.0802202		268746.6.fasta	0.3551	0.0366785		549446.2.fasta	0.5562	0.0524366		546805.2.fasta	0.6544	0.0319914		641832.2.fasta	49.11	0.0180737
10855.1.fasta	0.3205	0.0396221		197783.1.fasta	0.5742	0.0106753		6666666.3710.fasta	0.598	0.0177158		10726.1.fasta	0.3927	0.102817		318593.2.fasta	48.26	0.0741966
546803.2.fasta	0.6472	0.136061		549446.2.fasta	0.5562	0.00687725		6666666.3736.fasta	0.6899	0.0775911		55884.1.fasta	0.5077	0.0422042		51369.1.fasta	44.89	0.156884
341698.2.fasta	0.3811	0.0209678		6666666.3710.fasta	0.598	0.0317767		10708.1.fasta	0.6434	0.0437752		546182.2.fasta	0.6113	0.0468871		6666666.3765.fasta	58.92	0.0108447
10708.1.fasta	0.6434	0.0515299		546803.2.fasta	0.6472	0.0177348		236750.1.fasta	0.3972	0.0744074		490103.2.fasta	0.4227	0.0307951		551790.2.fasta	61.74	0.0305394
665886.2.fasta	0.3515	0.0432638		6666666.3736.fasta	0.6899	0.0740757		6666666.3712.fasta	0.6344	0.0189072		198542.1.fasta	0.3808	0.0506137		6666666.3867.fasta	61.79	0.0262026
31535.1.fasta	0.578	0.0359018		341698.2.fasta	0.3811	0.103511		31535.1.fasta	0.578	0.078001		373406.2.fasta	0.6911	0.0612531		270161.2.fasta	48.4	0.0404351
115987.1.fasta	0.4388	0.00815654		399183.2.fasta	0.4356	0.0229796		115987.1.fasta	0.4388	0.0603691		624134.2.fasta	0.5472	0.35454		329254.2.fasta	51.07	0.0206706
563121.2.fasta	0.5734	0.0405831		236750.1.fasta	0.3972	0.0722384		114777.1.fasta	0.6189	0.44237		40523.2.fasta	0.3593	0.0756851		10756.2.fasta	39.99	0.0556022
114777.1.fasta	0.6189	0.0877712		6666666.3712.fasta	0.6344	0.02139		6666666.3749.fasta	0.6649	0.0639187		379501.2.fasta	0.3563	0.0223185		120574.1.fasta	38.41	0.0986648
148943.1.fasta	0.4249	0.041643		31535.1.fasta	0.578	0.0354177		148943.1.fasta	0.4249	0.0558624		106284.1.fasta	0.3543	0.0348871		197310.2.fasta	35.32	0.0358329
459845.2.fasta	0.3979	0.0227358		115987.1.fasta	0.4388	0.0187258		6666666.3715.fasta	0.6345	0.02394		225726.1.fasta	0.3472	0.0417177		12353.1.fasta	37.66	0.0457023
528321.2.fasta	0.5973	0.0653757		563121.2.fasta	0.5734	0.0140364		215167.2.fasta	0.3346	0.0689916		373414.2.fasta	0.6896	0.0627394		347966.2.fasta	35.26	0.13771
215167.2.fasta	0.3346	0.0435868		6666666.3749.fasta	0.6649	0.075788		437329.2.fasta	0.5629	0.0205328		644524.2.fasta	0.662	0.109208		564886.2.fasta	51.11	0.0240468
373410.2.fasta	0.5971	0.0619877		148943.1.fasta	0.4249	0.0787349		359961.2.fasta	0.3526	0.046767		373403.2.fasta	0.6294	0.0263246		190478.1.fasta	28.38	0.252337
437329.2.fasta	0.5629	0.0566763		459845.2.fasta	0.3979	0.0534341		673832.2.fasta	0.3401	0.151612		487152.2.fasta	0.3433	0.0263922		6666666.3789.fasta	63.98	0.015585
359961.2.fasta	0.3526	0.039046		528321.2.fasta	0.5973	0.0102986		268747.4.fasta	0.3674	0.0533134		561999.2.fasta	0.5961	0.0298216		268746.6.fasta	35.51	0.0280738
185959.1.fasta	0.2316	0.206426		6666666.3715.fasta	0.6345	0.0342824		505291.2.fasta	0.6433	0.0919834		306323.3.fasta	0.4015	0.0756227		549446.2.fasta	55.62	0.0569159
673832.2.fasta	0.3401	0.0743121		215167.2.fasta	0.3346	0.0180099		444861.3.fasta	0.4062	0.127163		10682.2.fasta	0.4741	0.0747841		642111.2.fasta	42.96	0.117332
268747.4.fasta	0.3674	0.012007		373410.2.fasta	0.5971	0.0101899		6666666.3809.fasta	0.6404	0.0100593		213775.2.fasta	0.3494	0.0331531		6666666.3710.fasta	59.8	0.00907529
505291.2.fasta	0.6433	0.0514959		437329.2.fasta	0.5629	0.0164545		389469.2.fasta	0.6426	0.0591201		139872.2.fasta	0.347	0.0470786		546803.2.fasta	64.72	0.0405501
649688.2.fasta	0.6669	0.0393005		359961.2.fasta	0.3526	0.126552		205869.1.fasta	0.6312	0.0429995		532074.2.fasta	0.4878	0.060889		6666666.3736.fasta	68.99	0.0535171
444861.3.fasta	0.4062	0.0145414		268747.4.fasta	0.3674	0.0296638		386793.2.fasta	0.609	0.142504		320839.3.fasta	0.3346	0.0638601		341698.2.fasta	38.11	0.139888
389469.2.fasta	0.6426	0.0558541		505291.2.fasta	0.6433	0.0780716		6666666.3855.fasta	0.6079	0.04936		198539.1.fasta	0.3825	0.210469		10708.1.fasta	64.34	0.121159
205869.1.fasta	0.6312	0.0291024		444861.3.fasta	0.4062	0.0217136		320122.2.fasta	0.2877	0.0859097		458639.2.fasta	0.418	0.0602926		399183.2.fasta	43.56	0.0153565
386793.2.fasta	0.609	0.0381682		6666666.3809.fasta	0.6404	0.0293555		10726.1.fasta	0.3927	0.0586542		424944.2.fasta	0.4985	0.115087		236750.1.fasta	39.72	0.279839
559189.2.fasta	0.2933	0.0881335		205869.1.fasta	0.6312	0.0439182		6666666.3879.fasta	0.5957	0.0447854		205872.1.fasta	0.6538	0.0384663		6666666.3712.fasta	63.44	0.0135925
10864.2.fasta	0.4089	0.237268		386793.2.fasta	0.609	0.0371506		55884.1.fasta	0.5077	0.0841623		238854.4.fasta	0.3782	0.0739475		115987.1.fasta	43.88	0.0261923
338120.2.fasta	0.445	0.0767668		559189.2.fasta	0.2933	0.117208		546182.2.fasta	0.6113	0.0825084		363555.2.fasta	0.369	0.0610923		563121.2.fasta	57.34	0.01599
320122.2.fasta	0.2877	0.116499		320122.2.fasta	0.2877	0.124531		857312.3.fasta	0.4142	0.0523447		139870.2.fasta	0.3514	0.0330726		114777.1.fasta	61.89	0.0499621
181604.1.fasta	0.4372	0.344825		546805.2.fasta	0.6544	0.0127336		6666666.3747.fasta	0.6907	0.0715751		549445.2.fasta	0.5547	0.0510375		6666666.3749.fasta	66.49	0.045249
546805.2.fasta	0.6544	0.0830053		10726.1.fasta	0.3927	0.025918		6666666.3776.fasta	0.6176	0.0707761		72638.1.fasta	0.3827	0.04002		148943.1.fasta	42.49	0.0660044
10726.1.fasta	0.3927	0.0221201		6666666.3879.fasta	0.5957	0.0101654		686439.2.fasta	0.5701	0.0246918		494269.2.fasta	0.3472	0.0364867		459845.2.fasta	39.79	0.306628
55884.1.fasta	0.5077	0.030935		55884.1.fasta	0.5077	0.109403		198542.1.fasta	0.3808	0.138636		151535.1.fasta	0.3519	0.053561		437444.2.fasta	34.56	0.0882126
546182.2.fasta	0.6113	0.060093		6666666.3747.fasta	0.6907	0.0628484		373406.2.fasta	0.6911	0.0604698		575610.2.fasta	0.3325	0.0585011		528321.2.fasta	59.73	0.0183092
313629.2.fasta	0.4117	0.0331429		490103.2.fasta	0.4227	0.0210417		624134.2.fasta	0.5472	0.0378654		682370.2.fasta	0.3939	0.105554		6666666.3715.fasta	63.45	0.0128781
490103.2.fasta	0.4227	0.0152089		198542.1.fasta	0.3808	0.0353093		40523.2.fasta	0.3593	0.0461831		489779.2.fasta	0.495	0.0746313		215167.2.fasta	33.46	0.0585935
198542.1.fasta	0.3808	0.0334127		373406.2.fasta	0.6911	0.0685875		261665.2.fasta	0.4835	0.0369735		263375.1.fasta	0.654	0.0929721		373410.2.fasta	59.71	0.0183092
373406.2.fasta	0.6911	0.0961943		624134.2.fasta	0.5472	0.0222688		169683.1.fasta	0.3683	0.0472929		406340.2.fasta	0.6535	0.150901		128708.3.fasta	38.85	0.035247
624134.2.fasta	0.5472	0.057288		40523.2.fasta	0.3593	0.0398783		407392.2.fasta	0.3259	0.0424949		347962.3.fasta	0.3522	0.030443		437329.2.fasta	56.29	0.0181054
40523.2.fasta	0.3593	0.0238097		261665.2.fasta	0.4835	0.0412921		376758.2.fasta	0.5402	0.147701		200913.2.fasta	0.4709	0.0748312		359961.2.fasta	35.26	0.107799
261665.2.fasta	0.4835	0.0777434		379501.2.fasta	0.3563	0.106397		225726.1.fasta	0.3472	0.069121		546808.2.fasta	0.6478	0.0510728		673832.2.fasta	34.01	0.0575327
379501.2.fasta	0.3563	0.023981		169683.1.fasta	0.3683	0.0394294		697227.5.fasta	0.3959	0.010743		129862.2.fasta	0.511	0.0433324		268747.4.fasta	36.74	0.0255413
169683.1.fasta	0.3683	0.0227424		106284.1.fasta	0.3543	0.107523		373414.2.fasta	0.6896	0.0781184		175950.1.fasta	0.5101	0.081262		505291.2.fasta	64.33	0.0408565
106284.1.fasta	0.3543	0.0243766		407392.2.fasta	0.3259	0.088579		644524.2.fasta	0.662	0.0476827		320835.3.fasta	0.3408	0.0523162		649688.2.fasta	66.69	0.0801398
338129.2.fasta	0.463	0.0793597		376758.2.fasta	0.5402	0.16243		445683.3.fasta	0.4111	0.0471116		10760.1.fasta	0.484	0.0555518		444861.3.fasta	40.62	0.0304686
376758.2.fasta	0.5402	0.0789385		225726.1.fasta	0.3472	0.0666626		306323.3.fasta	0.4015	0.046385		225979.1.fasta	0.3278	0.0625194		6666666.3809.fasta	64.04	0.0157809
225726.1.fasta	0.3472	0.0504026		697227.5.fasta	0.3959	0.0241841		685506.5.fasta	0.6149	0.0905046		646413.2.fasta	0.3803	0.066402		389469.2.fasta	64.26	0.0647248
467481.2.fasta	0.6393	0.0395222		373414.2.fasta	0.6896	0.0630152		10682.2.fasta	0.4741	0.0729915		53369.2.fasta	0.341	0.0530134		205869.1.fasta	63.12	0.0353051
697227.5.fasta	0.3959	0.0791847		164037.1.fasta	0.6594	0.227656		555387.2.fasta	0.4112	0.094405		565140.2.fasta	0.378	0.0519983		655097.2.fasta	53.22	0.00962681
373414.2.fasta	0.6896	0.105748		644524.2.fasta	0.662	0.167093		213775.2.fasta	0.3494	0.070838		31532.1.fasta	0.3451	0.0341716		559189.2.fasta	29.33	0.133547
164037.1.fasta	0.6594	0.111659		373403.2.fasta	0.6294	0.0430468		12336.2.fasta	0.2628	0.125438		329864.2.fasta	0.4699	0.0625194		6666666.3855.fasta	60.79	0.0118242
373403.2.fasta	0.6294	0.0285784		573591.2.fasta	0.6369	0.0508609		139872.2.fasta	0.347	0.143896		484896.2.fasta	0.6228	0.106754		320122.2.fasta	28.77	0.42705
573591.2.fasta	0.6369	0.0835561		487152.2.fasta	0.3433	0.134351		532074.2.fasta	0.4878	0.0312855		59506.3.fasta	0.3459	0.0297442		181604.1.fasta	43.72	0.0911608
487152.2.fasta	0.3433	0.0626295		445683.3.fasta	0.4111	0.0144837		320839.3.fasta	0.3346	0.0700599		347328.2.fasta	0.6446	0.114538		546805.2.fasta	65.44	0.0326736
445683.3.fasta	0.4111	0.0139361		561999.2.fasta	0.5961	0.00623261		244589.2.fasta	0.397	0.132126		445515.2.fasta	0.3362	0.0639854		10726.1.fasta	39.27	0.0271717
561999.2.fasta	0.5961	0.064135		306323.3.fasta	0.4015	0.0365759		198539.1.fasta	0.3825	0.0609336		40631.1.fasta	0.5117	0.0788733		6666666.3879.fasta	59.57	0.00606209
306323.3.fasta	0.4015	0.0300719		490912.2.fasta	0.4792	0.018955		988656.3.fasta	0.5816	0.0489638		563123.2.fasta	0.6122	0.0476935		55884.1.fasta	50.77	0.201329
490912.2.fasta	0.4792	0.139347		10682.2.fasta	0.4741	0.0491134		6666666.3777.fasta	0.6647	0.0636944		12348.2.fasta	0.4782	0.100488		546182.2.fasta	61.13	0.0570254
10682.2.fasta	0.4741	0.0268158		555387.2.fasta	0.4112	0.0333514		458639.2.fasta	0.418	0.042003		561997.2.fasta	0.5967	0.0292123		857312.3.fasta	41.42	0.024977
555387.2.fasta	0.4112	0.0203881		213775.2.fasta	0.3494	0.199573		424944.2.fasta	0.4985	0.0101829		320844.3.fasta	0.3524	0.0334841		6666666.3747.fasta	69.07	0.048491
213775.2.fasta	0.3494	0.0384807		12336.2.fasta	0.2628	0.113658		205872.1.fasta	0.6538	0.0583286		12345.1.fasta	0.3465	0.180483		490103.2.fasta	42.27	0.0240361
139872.2.fasta	0.347	0.117923		532074.2.fasta	0.4878	0.0228587		238854.4.fasta	0.3782	0.147827		235201.3.fasta	0.3935	0.0906999		6666666.3776.fasta	61.76	0.0258449
532074.2.fasta	0.4878	0.0377276		320839.3.fasta	0.3346	0.0180085		6666666.3840.fasta	0.6087	0.0394353		88870.1.fasta	0.6811	0.0541021		686439.2.fasta	57.01	0.01445
320839.3.fasta	0.3346	0.0431097		198539.1.fasta	0.3825	0.0283833		139870.2.fasta	0.3514	0.0328909		320843.3.fasta	0.3506	0.0432359		373406.2.fasta	69.11	0.065949
198539.1.fasta	0.3825	0.0326845		6666666.3777.fasta	0.6647	0.074647		261726.2.fasta	0.5695	0.150358		204086.1.fasta	0.2962	0.0723722		624134.2.fasta	54.72	0.00908851
10869.1.fasta	0.4272	0.237463		458639.2.fasta	0.418	0.0250845		549445.2.fasta	0.5547	0.0171167		431892.2.fasta	0.6462	0.200741		40523.2.fasta	35.93	0.0483189
458639.2.fasta	0.418	0.0425005		557393.2.fasta	0.4381	0.0185287		72638.1.fasta	0.3827	0.0385791		372457.2.fasta	0.3921	0.0532492		261665.2.fasta	48.35	0.223323
127511.3.fasta	0.4567	0.221301		127511.3.fasta	0.4567	0.0410884		151535.1.fasta	0.3519	0.0654444		365048.2.fasta	0.4438	0.0933442		379501.2.fasta	35.63	0.0480312
520962.2.fasta	0.5965	0.271566		520962.2.fasta	0.5965	0.105005		6666666.3768.fasta	0.6749	0.0503684		396359.2.fasta	0.2813	0.151829		169683.1.fasta	36.83	0.0698079
424944.2.fasta	0.4985	0.0665095		424944.2.fasta	0.4985	0.0129263		575610.2.fasta	0.3325	0.0665363		198538.1.fasta	0.378	0.0246416		106284.1.fasta	35.43	0.12525
205872.1.fasta	0.6538	0.0535644		134554.1.fasta	0.5774	0.0372674		682370.2.fasta	0.3939	0.0418762		373405.2.fasta	0.6288	0.0525706		407392.2.fasta	32.59	0.100692
134554.1.fasta	0.5774	0.0793557		238854.4.fasta	0.3782	0.0344485		6666666.3754.fasta	0.6756	0.0488978		273133.2.fasta	0.4933	0.0429068		467481.2.fasta	63.93	0.0683274
238854.4.fasta	0.3782	0.0224475		363555.2.fasta	0.369	0.0864751		489779.2.fasta	0.495	0.115719		194949.1.fasta	0.499	0.0663897		697227.5.fasta	39.59	0.030192
363555.2.fasta	0.369	0.0817568		549445.2.fasta	0.5547	0.0079008		6666666.3785.fasta	0.665	0.0634374		10677.1.fasta	0.5205	0.0850474		373414.2.fasta	68.96	0.0518459
261726.2.fasta	0.5695	0.0324117		72638.1.fasta	0.3827	0.0329006		6666666.3762.fasta	0.6844	0.062928		445516.2.fasta	0.3359	0.0658397		644524.2.fasta	66.2	0.0588626
549445.2.fasta	0.5547	0.0309749		151535.1.fasta	0.3519	0.0506535		263375.1.fasta	0.654	0.0429819		320836.3.fasta	0.3692	0.0699158		373403.2.fasta	62.94	0.035001
72638.1.fasta	0.3827	0.0356275		6666666.3768.fasta	0.6749	0.0583356		406340.2.fasta	0.6535	0.036629		663557.2.fasta	0.6387	0.0514259		573591.2.fasta	63.69	0.0845781
494269.2.fasta	0.3472	0.0461296		575610.2.fasta	0.3325	0.0188292		347962.3.fasta	0.3522	0.0386284		373409.2.fasta	0.6651	0.131846		487152.2.fasta	34.33	0.0651972
151535.1.fasta	0.3519	0.051433		682370.2.fasta	0.3939	0.0388019		200913.2.fasta	0.4709	0.0487489		31757.1.fasta	0.6226	0.107823		445683.3.fasta	41.11	0.0236223
575610.2.fasta	0.3325	0.0423449		6666666.3754.fasta	0.6756	0.0599433		6666666.3861.fasta	0.5879	0.0301448		77775.1.fasta	0.3901	0.0765602		561999.2.fasta	59.61	0.0182182
682370.2.fasta	0.3939	0.0242578		489779.2.fasta	0.495	0.019874		6666666.3806.fasta	0.6135	0.037366		245685.2.fasta	0.4268	0.0987025		685506.5.fasta	61.49	0.0304637
406340.2.fasta	0.6535	0.0481725		6666666.3785.fasta	0.665	0.0757653		1002724.3.fasta	0.4541	0.0300146		515982.2.fasta	0.6656	0.10939		490912.2.fasta	47.92	0.0179875
347962.3.fasta	0.3522	0.075623		6666666.3762.fasta	0.6844	0.150234		6666666.3802.fasta	0.6376	0.0244032		546807.2.fasta	0.6483	0.0526535		10682.2.fasta	47.41	0.00875175
200913.2.fasta	0.4709	0.016606		263375.1.fasta	0.654	0.0608243		129862.2.fasta	0.511	0.0970197		665887.2.fasta	0.3503	0.048619		555387.2.fasta	41.12	0.0177835
338118.2.fasta	0.4508	0.075602		200913.2.fasta	0.4709	0.028695		709484.3.fasta	0.3992	0.0111107		491003.2.fasta	0.399	0.196635		12336.2.fasta	26.28	0.184881
338103.2.fasta	0.4473	0.0864646		546808.2.fasta	0.6478	0.0175727		175950.1.fasta	0.5101	0.0769505		413066.2.fasta	0.4161	0.0353228		139872.2.fasta	34.7	0.0552182
129862.2.fasta	0.511	0.05299		6666666.3802.fasta	0.6376	0.0389439		6666666.3857.fasta	0.6302	0.043734		151528.1.fasta	0.5321	0.0773543		532074.2.fasta	48.78	0.0424353
709484.3.fasta	0.3992	0.118777		129862.2.fasta	0.511	0.0811985		6666666.3864.fasta	0.6405	0.0100968		320849.3.fasta	0.3572	0.0221955		320839.3.fasta	33.46	0.0511649
175950.1.fasta	0.5101	0.01694		709484.3.fasta	0.3992	0.0254992		6666666.3845.fasta	0.6478	0.0529158		187764.2.fasta	0.4525	0.153572		244589.2.fasta	39.7	0.0727637
445685.3.fasta	0.3996	0.0104251		175950.1.fasta	0.5101	0.103048		445685.3.fasta	0.3996	0.0310775		338473.2.fasta	0.495	0.114966		198539.1.fasta	38.25	0.0725178
320835.3.fasta	0.3408	0.0507933		6666666.3864.fasta	0.6405	0.0295996		6666666.3721.fasta	0.6418	0.0100593		532075.2.fasta	0.4994	0.0358284		988656.3.fasta	58.16	0.00774101
10760.1.fasta	0.484	0.0380483		6666666.3845.fasta	0.6478	0.0174621		10760.1.fasta	0.484	0.0139433		287412.2.fasta	0.3497	0.0506811		6666666.3777.fasta	66.47	0.0448572
225979.1.fasta	0.3278	0.0495505		445685.3.fasta	0.3996	0.016984		260149.5.fasta	0.372	0.0328069		347325.2.fasta	0.5356	0.255427		458639.2.fasta	41.8	0.0495076
646413.2.fasta	0.3803	0.0167113		320835.3.fasta	0.3408	0.0923899		225979.1.fasta	0.3278	0.0690428		151537.1.fasta	0.3568	0.0818917		346884.2.fasta	36.8	0.0650188
338123.2.fasta	0.4437	0.0702506		6666666.3721.fasta	0.6418	0.0260661		53369.2.fasta	0.341	0.0502456		307240.3.fasta	0.4007	0.0298642		6666666.13470.fasta	63.53	0.0139416
53369.2.fasta	0.341	0.0613248		10760.1.fasta	0.484	0.0109377		31532.1.fasta	0.3451	0.106185		418443.2.fasta	0.4984	0.0894835		557393.2.fasta	43.81	0.0210128
565140.2.fasta	0.378	0.0342834		646413.2.fasta	0.3803	0.0653668		329864.2.fasta	0.4699	0.0674551		103807.1.fasta	0.4935	0.104542		127511.3.fasta	45.67	0.0988721
31532.1.fasta	0.3451	0.0379251		53369.2.fasta	0.341	0.134596		484896.2.fasta	0.6228	0.300437		348058.2.fasta	0.4726	0.0433068		520962.2.fasta	59.65	0.239218
329864.2.fasta	0.4699	0.0170118		565140.2.fasta	0.378	0.0574604		59506.3.fasta	0.3459	0.0428938		10685.2.fasta	0.3996	0.112101		424944.2.fasta	49.85	0.162649
10847.1.fasta	0.4476	0.0767808		31532.1.fasta	0.3451	0.0500806		347328.2.fasta	0.6446	0.0451389		66797.1.fasta	0.3464	0.162615		861044.5.fasta	66.39	0.0448433
484896.2.fasta	0.6228	0.0384716		329864.2.fasta	0.4699	0.0268779		6666666.3847.fasta	0.6646	0.0635833		10753.2.fasta	0.3732	0.090262		205872.1.fasta	65.38	0.183793
59506.3.fasta	0.3459	0.0703516		484896.2.fasta	0.6228	0.0196575		6666666.3812.fasta	0.6364	0.0257253		345922.2.fasta	0.3494	0.030443		134554.1.fasta	57.74	0.0646225
445515.2.fasta	0.3362	0.0558853		59506.3.fasta	0.3459	0.0929552		6666666.3725.fasta	0.6842	0.0643504		221029.1.fasta	0.4743	0.0427605		238854.4.fasta	37.82	0.0324905
40631.1.fasta	0.5117	0.0268648		347328.2.fasta	0.6446	0.0156656		981330.3.fasta	0.6957	0.0682961		347324.2.fasta	0.6208	0.122615		6666666.3840.fasta	60.87	0.00881631
563123.2.fasta	0.6122	0.0621617		6666666.3847.fasta	0.6646	0.0746249		867696.3.fasta	0.4522	0.0114187		37554.1.fasta	0.4979	0.045361		363555.2.fasta	36.9	0.292805
12348.2.fasta	0.4782	0.0171073		445515.2.fasta	0.3362	0.213558		6666666.3878.fasta	0.6365	0.0243404		330398.2.fasta	0.4082	0.0697201		139870.2.fasta	35.14	0.0547808
10719.1.fasta	0.6362	0.0692579		6666666.3812.fasta	0.6364	0.0324132		40631.1.fasta	0.5117	0.108021		546183.2.fasta	0.6292	0.0286206		455649.2.fasta	22.21	0.237647
561997.2.fasta	0.5967	0.0604923		6666666.3725.fasta	0.6842	0.0653228		6666666.3787.fasta	0.6364	0.0272007		36343.2.fasta	0.3599	0.0421511		261726.2.fasta	56.95	0.0117845
320844.3.fasta	0.3524	0.0300761		6666666.3878.fasta	0.6365	0.0316247		260372.3.fasta	0.5056	0.0273559		673839.2.fasta	0.3778	0.283406		549445.2.fasta	55.47	0.0597463
12345.1.fasta	0.3465	0.0436437		40631.1.fasta	0.5117	0.0222241		12348.2.fasta	0.4782	0.0464621		10710.1.fasta	0.4986	0.0646266		285013.2.fasta	35.22	0.0720165
235201.3.fasta	0.3935	0.035648		6666666.3787.fasta	0.6364	0.0373126		6666666.3818.fasta	0.6645	0.0636944		213769.2.fasta	0.3388	0.0359783		494269.2.fasta	34.72	0.137727
338111.2.fasta	0.4449	0.069625		260372.3.fasta	0.5056	0.00859647		320844.3.fasta	0.3524	0.14711		279280.3.fasta	0.6519	0.153936		151535.1.fasta	35.19	0.0968713
382359.2.fasta	0.4063	0.0125379		563123.2.fasta	0.6122	0.0579749		12345.1.fasta	0.3465	0.0415139		205880.1.fasta	0.5731	0.0300987		181007.3.fasta	34.73	0.0546393
88870.1.fasta	0.6811	0.0667609		12348.2.fasta	0.4782	0.0500497		235201.3.fasta	0.3935	0.0503659		10754.1.fasta	0.4708	0.0764776		6666666.3768.fasta	67.49	0.0329373
400567.2.fasta	0.518	0.0314167		6666666.3818.fasta	0.6645	0.075703		910475.3.fasta	0.6228	0.111503		227940.1.fasta	0.5211	0.0858522		575610.2.fasta	33.25	0.0595597
320843.3.fasta	0.3506	0.0333661		10719.1.fasta	0.6362	0.0556786		762660.3.fasta	0.3637	0.0164865		194699.1.fasta	0.6541	0.199466		682370.2.fasta	39.39	0.0460884
204086.1.fasta	0.2962	0.0808098		561997.2.fasta	0.5967	0.0103378		382359.2.fasta	0.4063	0.0563007		504346.2.fasta	0.5626	0.0391389		6666666.3754.fasta	67.56	0.0349445
431892.2.fasta	0.6462	0.0537222		320844.3.fasta	0.3524	0.100248		400567.2.fasta	0.518	0.021391		12402.1.fasta	0.3964	0.0588138		489779.2.fasta	49.5	0.0204535
372457.2.fasta	0.3921	0.0309688		12345.1.fasta	0.3465	0.0515158		6666666.3819.fasta	0.6079	0.04936		205875.1.fasta	0.6538	0.0383587		6666666.3785.fasta	66.5	0.0454328
338121.2.fasta	0.4458	0.070586		235201.3.fasta	0.3935	0.0333994		925984.3.fasta	0.4733	0.0338809		387909.2.fasta	0.3299	0.0641234		6666666.3762.fasta	68.44	0.0954857
365048.2.fasta	0.4438	0.0180013		762660.3.fasta	0.3637	0.0209115		320843.3.fasta	0.3506	0.0635213		12390.1.fasta	0.3551	0.0485722		263375.1.fasta	65.4	0.120417
396359.2.fasta	0.2813	0.0687548		382359.2.fasta	0.4063	0.0176579		431892.2.fasta	0.6462	0.0477668		431894.2.fasta	0.6305	0.227159		406340.2.fasta	65.35	0.0492993
198538.1.fasta	0.378	0.0472336		88870.1.fasta	0.6811	0.0795126		6666666.3884.fasta	0.6638	0.0630216		537874.2.fasta	0.4051	0.0326112		347962.3.fasta	35.22	0.0692753
373405.2.fasta	0.6288	0.0434975		400567.2.fasta	0.518	0.0241805		6666666.3880.fasta	0.6187	0.126042		648017.2.fasta	0.3357	0.0639854		200913.2.fasta	47.09	0.0142619
273133.2.fasta	0.4933	0.0303267		6666666.3819.fasta	0.6079	0.0475611		396359.2.fasta	0.2813	0.23208		330397.2.fasta	0.3621	0.066508		6666666.3861.fasta	58.79	0.0101976
10677.1.fasta	0.5205	0.0253688		320843.3.fasta	0.3506	0.10403		198538.1.fasta	0.378	0.0970728		320842.3.fasta	0.3501	0.0420107		6666666.3806.fasta	61.35	0.0142727
445516.2.fasta	0.3359	0.0493507		204086.1.fasta	0.2962	0.181112		6666666.3764.fasta	0.6153	0.0179423		279530.3.fasta	0.5445	0.124121		1002724.3.fasta	45.41	0.0177106
338132.2.fasta	0.4608	0.0847663		431892.2.fasta	0.6462	0.117617		194949.1.fasta	0.499	0.16879		578234.2.fasta	0.3704	0.0396456		546808.2.fasta	64.78	0.0305133
320836.3.fasta	0.3692	0.0355871		372457.2.fasta	0.3921	0.0505252		10677.1.fasta	0.5205	0.0440923		264729.3.fasta	0.6286	0.222946		6666666.3802.fasta	63.76	0.0156692
663557.2.fasta	0.6387	0.0772797		6666666.3884.fasta	0.6638	0.0751813		445516.2.fasta	0.3359	0.0700599		47049.2.fasta	0.4864	0.0512729		658056.2.fasta	25.27	0.202156
871584.5.fasta	0.3126	0.045036		365048.2.fasta	0.4438	0.0488406		6666666.3739.fasta	0.6708	0.048077		320837.3.fasta	0.3373	0.0598253		668994.3.fasta	67.95	0.0865159
373409.2.fasta	0.6651	0.112108		198538.1.fasta	0.378	0.195952		6666666.3788.fasta	0.6157	0.0173776		340054.2.fasta	0.4291	0.0891416		129862.2.fasta	51.1	0.0219382
31757.1.fasta	0.6226	0.0387693		6666666.3764.fasta	0.6153	0.0151873		320836.3.fasta	0.3692	0.0490812		496396.2.fasta	0.6218	0.106437		709484.3.fasta	39.92	0.0254315
225588.1.fasta	0.6276	0.0709837		373405.2.fasta	0.6288	0.0195379		871584.5.fasta	0.3126	0.0613126		215158.1.fasta	0.5085	0.0740825		979525.3.fasta	37.07	0.0444829
145579.1.fasta	0.461	0.0498577		273133.2.fasta	0.4933	0.0198181		910474.3.fasta	0.6323	0.053626		561998.2.fasta	0.5955	0.0301899		175950.1.fasta	51.01	0.0183134
515982.2.fasta	0.6656	0.0378041		194949.1.fasta	0.499	0.0471393		1002725.3.fasta	0.3557	0.0277297		67571.2.fasta	0.4389	0.0815766		6666666.3857.fasta	63.02	0.0115089
338106.2.fasta	0.4483	0.0919512		10677.1.fasta	0.5205	0.0701507		77775.1.fasta	0.3901	0.0158779		540068.2.fasta	0.6326	0.0463166		6666666.3864.fasta	64.05	0.0159242
665887.2.fasta	0.3503	0.0432638		445516.2.fasta	0.3359	0.0290729		6666666.3760.fasta	0.6117	0.045285		320845.3.fasta	0.3572	0.020219		6666666.3845.fasta	64.78	0.017637
491003.2.fasta	0.399	0.0179732		6666666.3788.fasta	0.6157	0.0150066		491003.2.fasta	0.399	0.0418323		373126.3.fasta	0.5083	0.19534		445685.3.fasta	39.96	0.0170898
413066.2.fasta	0.4161	0.0221435		127507.1.fasta	0.4516	0.0497816		151528.1.fasta	0.5321	0.206341		576790.2.fasta	0.3952	0.054605		320835.3.fasta	34.08	0.710012
151528.1.fasta	0.5321	0.0330122		446529.2.fasta	0.6831	0.169205		979535.3.fasta	0.4286	0.0683059		632112.2.fasta	0.374	0.104705		6666666.3721.fasta	64.18	0.015548
320849.3.fasta	0.3572	0.0298472		157899.2.fasta	0.252	0.289084		187764.2.fasta	0.4525	0.0552186		373413.2.fasta	0.6734	0.0382221		10760.1.fasta	48.4	0.0495656
338112.2.fasta	0.4436	0.0693658		320836.3.fasta	0.3692	0.017571		338473.2.fasta	0.495	0.108649		591487.2.fasta	0.6748	0.0382954		260149.5.fasta	37.2	0.0470476
187764.2.fasta	0.4525	0.0179967		99179.2.fasta	0.3863	0.128749		532075.2.fasta	0.4994	0.0222074		10759.1.fasta	0.499	0.0503548		225979.1.fasta	32.78	0.13738
338473.2.fasta	0.495	0.0427249		373409.2.fasta	0.6651	0.0700853		6666666.3808.fasta	0.6342	0.0157101		563769.2.fasta	0.5091	0.0645572		646413.2.fasta	38.03	0.103535
532075.2.fasta	0.4994	0.036882		31757.1.fasta	0.6226	0.0228125		347325.2.fasta	0.5356	0.0891345		582382.2.fasta	0.5558	0.0445603		53369.2.fasta	34.1	0.0586758
287412.2.fasta	0.3497	0.0418119		77775.1.fasta	0.3901	0.032304		307240.3.fasta	0.4007	0.0743023		10679.1.fasta	0.5017	0.083171		565140.2.fasta	37.8	0.0959361
334856.3.fasta	0.6239	0.292089		245685.2.fasta	0.4268	0.0359499		418443.2.fasta	0.4984	0.0409426		10747.1.fasta	0.3883	0.0973074		329864.2.fasta	46.99	0.0248433
347325.2.fasta	0.5356	0.0404147		225588.1.fasta	0.6276	0.0522309		103807.1.fasta	0.4935	0.0285198		546806.2.fasta	0.6474	0.0300738		484896.2.fasta	62.28	0.0466723
151537.1.fasta	0.3568	0.0869128		546807.2.fasta	0.6483	0.0175075		6666666.3772.fasta	0.6143	0.0192555		641487.2.fasta	0.3438	0.0666815		59506.3.fasta	34.59	0.193818
418443.2.fasta	0.4984	0.0122821		491003.2.fasta	0.399	0.0227735		6666666.3890.fasta	0.6133	0.0190171		10658.1.fasta	0.4809	0.116791		347328.2.fasta	64.46	0.0314016
103807.1.fasta	0.4935	0.0180814		413066.2.fasta	0.4161	0.209408		440250.2.fasta	0.4648	0.0317453		376821.2.fasta	0.4158	0.0958249		6666666.3847.fasta	66.46	0.0455517
10849.1.fasta	0.4518	0.0995129		151528.1.fasta	0.5321	0.0195176		6666666.3871.fasta	0.6102	0.0192926		373408.2.fasta	0.6153	0.0392218		445515.2.fasta	33.62	0.123033
440250.2.fasta	0.4648	0.0653332		320849.3.fasta	0.3572	0.0927905		318596.2.fasta	0.4818	0.0714187		293178.2.fasta	0.3951	0.0412966		6666666.3812.fasta	63.64	0.0146445
12024.2.fasta	0.492	0.137818		187764.2.fasta	0.4525	0.00936906		6666666.3774.fasta	0.6137	0.125914		503388.2.fasta	0.3366	0.0855054		6666666.3725.fasta	68.42	0.0418536
318596.2.fasta	0.4818	0.0748345		338473.2.fasta	0.495	0.0412022		347326.2.fasta	0.4489	0.0444259		198540.1.fasta	0.3803	0.0250767		981330.3.fasta	69.57	0.0364972
10863.2.fasta	0.4094	0.232166		532075.2.fasta	0.4994	0.0169075		683735.2.fasta	0.4244	0.0350922		388452.2.fasta	0.3511	0.0410446		867696.3.fasta	45.22	0.0124191
348058.2.fasta	0.4726	0.0159915		347325.2.fasta	0.5356	0.0182167		348058.2.fasta	0.4726	0.0637819		268748.3.fasta	0.3876	0.237801		6666666.3878.fasta	63.65	0.014862
198541.1.fasta	0.3857	0.0148415		151537.1.fasta	0.3568	0.11732		10753.2.fasta	0.3732	0.0620795		244310.1.fasta	0.6364	0.151143		40631.1.fasta	51.17	0.0398385
225067.3.fasta	0.4104	0.0367988		307240.3.fasta	0.4007	0.0998769		879630.3.fasta	0.43	0.0168117		470314.2.fasta	0.519	0.0515739		6666666.3787.fasta	63.64	0.0141824
10685.2.fasta	0.3996	0.0506943		33771.1.fasta	0.5585	0.0369453		345922.2.fasta	0.3494	0.0338288		204090.1.fasta	0.2932	0.0723722		260372.3.fasta	50.56	0.0569835
120086.1.fasta	0.545	0.0289642		418443.2.fasta	0.4984	0.00662166		221029.1.fasta	0.4743	0.0371323		348137.2.fasta	0.6154	0.133752		563123.2.fasta	61.22	0.069219
127509.3.fasta	0.4566	0.221301		103807.1.fasta	0.4935	0.0376221		37554.1.fasta	0.4979	0.0228292		872294.5.fasta	0.3402	0.217325		12348.2.fasta	47.82	0.0737454
338130.2.fasta	0.4596	0.0814917		6666666.3772.fasta	0.6143	0.0161046		330398.2.fasta	0.4082	0.082603		279383.3.fasta	0.6212	0.177835		6666666.3818.fasta	66.45	0.0455827
10753.2.fasta	0.3732	0.0387005		6666666.3890.fasta	0.6133	0.0143605		866889.3.fasta	0.4893	0.0366697		360398.2.fasta	0.3347	0.0645042		10719.1.fasta	63.62	0.068149
345922.2.fasta	0.3494	0.0387412		440250.2.fasta	0.4648	0.046433		673839.2.fasta	0.3778	0.0464119		658401.2.fasta	0.523	0.0585384		561997.2.fasta	59.67	0.033748
221029.1.fasta	0.4743	0.0166487		318596.2.fasta	0.4818	0.0415133		10710.1.fasta	0.4986	0.0835403		359962.2.fasta	0.3513	0.030443		320844.3.fasta	35.24	0.145363
347324.2.fasta	0.6208	0.0843619		6666666.3774.fasta	0.6137	0.044135		213769.2.fasta	0.3388	0.0699296		373411.2.fasta	0.5966	0.0285352		12345.1.fasta	34.65	0.0962801
37554.1.fasta	0.4979	0.018133		347326.2.fasta	0.4489	0.0206468		279280.3.fasta	0.6519	0.0695394		204270.1.fasta	0.623	0.106437		235201.3.fasta	39.35	0.0528499
10848.1.fasta	0.4492	0.0910094		348058.2.fasta	0.4726	0.0145228		329381.8.fasta	0.4352	0.0130264		320850.3.fasta	0.3596	0.0298327		910475.3.fasta	62.28	0.0290984
451705.2.fasta	0.4402	0.0123173		198541.1.fasta	0.3857	0.101211		6666666.3892.fasta	0.6387	0.0162389		462590.2.fasta	0.6426	0.257999		762660.3.fasta	36.37	0.0381888
338108.2.fasta	0.4586	0.0808841		10685.2.fasta	0.3996	0.0328363		6666666.3709.fasta	0.6286	0.062634		355246.2.fasta	0.4428	0.0890996		382359.2.fasta	40.63	0.0477385
330398.2.fasta	0.4082	0.0161305		127509.3.fasta	0.4566	0.0410884		205880.1.fasta	0.5731	0.0959627		55510.3.fasta	0.3026	0.0737125		400567.2.fasta	51.8	0.0737203
546183.2.fasta	0.6292	0.0262776		66797.1.fasta	0.3464	0.0495845		444860.3.fasta	0.4043	0.0481998		280701.3.fasta	0.6317	0.0917401		6666666.3819.fasta	60.79	0.0126503
36343.2.fasta	0.3599	0.028203		10753.2.fasta	0.3732	0.0752352		6666666.3783.fasta	0.6652	0.0636944		480808.2.fasta	0.6727	0.0977526		925984.3.fasta	47.33	0.0114833
10710.1.fasta	0.4986	0.0533875		879630.3.fasta	0.43	0.0256566		10754.1.fasta	0.4708	0.0231344		43685.1.fasta	0.3546	0.055579		320843.3.fasta	35.06	0.0803634
213769.2.fasta	0.3388	0.0420484		345922.2.fasta	0.3494	0.107759		669008.3.fasta	0.4873	0.0440634		552525.2.fasta	0.3642	0.0378842		431892.2.fasta	64.62	0.075863
329381.8.fasta	0.4352	0.0537676		221029.1.fasta	0.4743	0.0332891		6666666.3741.fasta	0.6073	0.04936		387908.2.fasta	0.3459	0.0246549		372457.2.fasta	39.21	0.0941643
10844.1.fasta	0.4434	0.0765654		347324.2.fasta	0.6208	0.0696622		227940.1.fasta	0.5211	0.0356866		563119.2.fasta	0.6177	0.0437901		6666666.3884.fasta	66.38	0.0443893
475178.2.fasta	0.3369	0.0604562		37554.1.fasta	0.4979	0.033293		6666666.3810.fasta	0.6105	0.0386078		45406.2.fasta	0.3534	0.0661701		6666666.3880.fasta	61.87	0.0280615
205880.1.fasta	0.5731	0.0365532		451705.2.fasta	0.4402	0.0155686		6666666.3848.fasta	0.6388	0.0476968		194948.1.fasta	0.4969	0.0788031		396359.2.fasta	28.13	0.228085
173824.1.fasta	0.4537	0.0215352		330398.2.fasta	0.4082	0.0370177		136084.1.fasta	0.4616	0.0268425		213236.1.fasta	0.665	0.131846		198538.1.fasta	37.8	0.0902627
444860.3.fasta	0.4043	0.0149429		546183.2.fasta	0.6292	0.0403891		205875.1.fasta	0.6538	0.0633503		546184.2.fasta	0.6757	0.0339606		6666666.3764.fasta	61.53	0.00631914
10754.1.fasta	0.4708	0.0169349		673839.2.fasta	0.3778	0.0211452		384360.2.fasta	0.6261	0.117879		386792.2.fasta	0.6232	0.0934727		373405.2.fasta	62.88	0.0998963
338124.2.fasta	0.4454	0.0702137		10710.1.fasta	0.4986	0.037175		6666666.3708.fasta	0.6662	0.0496936		540067.2.fasta	0.6343	0.0378805		273133.2.fasta	49.33	0.0192546
227940.1.fasta	0.5211	0.0220404		279280.3.fasta	0.6519	0.0496265		12390.1.fasta	0.3551	0.211289		194966.1.fasta	0.4723	0.234701		194949.1.fasta	49.9	0.0241783
338105.2.fasta	0.4494	0.0858222		329381.8.fasta	0.4352	0.0167556		431894.2.fasta	0.6305	0.0410273		369257.2.fasta	0.4719	0.0489918		10677.1.fasta	52.05	0.0341965
179237.1.fasta	0.6149	0.042582		6666666.3892.fasta	0.6387	0.0298899		537874.2.fasta	0.4051	0.0486759		387905.2.fasta	0.3416	0.054182		445516.2.fasta	33.59	0.0401994
136084.1.fasta	0.4616	0.0307126		475178.2.fasta	0.3369	0.0370701		330397.2.fasta	0.3621	0.0417056		673837.2.fasta	0.3455	0.0734089		6666666.3739.fasta	67.08	0.0345212
504346.2.fasta	0.5626	0.0317118		205880.1.fasta	0.5731	0.0098493		424716.2.fasta	0.4613	0.142087		373404.2.fasta	0.6474	0.0300738		6666666.3788.fasta	61.57	0.00705386
12402.1.fasta	0.3964	0.0229993		444860.3.fasta	0.4043	0.0341697		753085.3.fasta	0.6072	0.0781771		330396.2.fasta	0.351	0.314115		157899.2.fasta	25.2	0.144894
205875.1.fasta	0.6538	0.0940508		6666666.3783.fasta	0.6652	0.075703		6666666.3784.fasta	0.6679	0.0475068		403905.2.fasta	0.3965	0.025392		320836.3.fasta	36.92	0.0992759
387909.2.fasta	0.3299	0.0495505		10754.1.fasta	0.4708	0.028695		6666666.3755.fasta	0.6155	0.0169589		29252.1.fasta	0.5309	0.0661457		663557.2.fasta	63.87	0.0129613
12390.1.fasta	0.3551	0.010801		6666666.3741.fasta	0.6073	0.0460901		760939.3.fasta	0.4003	0.0114979		560178.2.fasta	0.3926	0.0764076		128710.2.fasta	40.37	0.0673563
431894.2.fasta	0.6305	0.0862651		227940.1.fasta	0.5211	0.0409733		279530.3.fasta	0.5445	0.0290915		470865.2.fasta	0.2894	0.112402		99179.2.fasta	38.63	0.0482304
537874.2.fasta	0.4051	0.0252785		6666666.3848.fasta	0.6388	0.0298213		910473.3.fasta	0.6371	0.098204		417280.2.fasta	0.5589	0.0928737		871584.5.fasta	31.26	0.068571
648017.2.fasta	0.3357	0.0558791		136084.1.fasta	0.4616	0.0121596		6666666.3731.fasta	0.6639	0.0523969		540065.2.fasta	0.6371	0.0383857		910474.3.fasta	63.23	0.0281454
338140.2.fasta	0.4508	0.0766365		194699.1.fasta	0.6541	0.0608243		264729.3.fasta	0.6286	0.0379314		581037.2.fasta	0.5559	0.0465167		1002725.3.fasta	35.57	0.0334348
424716.2.fasta	0.4613	0.0366126		504346.2.fasta	0.5626	0.0458175		6666666.3782.fasta	0.6124	0.127872		97081.1.fasta	0.4991	0.0865923		373409.2.fasta	66.51	0.0500532
320842.3.fasta	0.3501	0.037793		12402.1.fasta	0.3964	0.0300327		6666666.3790.fasta	0.5878	0.0301856		532077.2.fasta	0.5325	0.0469532		31757.1.fasta	62.26	0.536864
279530.3.fasta	0.5445	0.0436866		205875.1.fasta	0.6538	0.0865877		6666666.3779.fasta	0.6296	0.043734		546185.2.fasta	0.6284	0.0272407		77775.1.fasta	39.01	0.0940737
578234.2.fasta	0.3704	0.0402423		384360.2.fasta	0.6261	0.0606905		320837.3.fasta	0.3373	0.0825096		129861.2.fasta	0.511	0.0518531		6666666.3760.fasta	61.17	0.0251189
47049.2.fasta	0.4864	0.0179573		387909.2.fasta	0.3299	0.139434		445686.3.fasta	0.3912	0.0795691		405947.2.fasta	0.3556	0.0219418		245685.2.fasta	42.68	0.0383474
320837.3.fasta	0.3373	0.0431201		6666666.3708.fasta	0.6662	0.064464		340054.2.fasta	0.4291	0.0577879		320847.3.fasta	0.3553	0.0219418		225588.1.fasta	62.76	0.0888196
445686.3.fasta	0.3912	0.0102052		431894.2.fasta	0.6305	0.106181		6666666.3766.fasta	0.6646	0.0635833		526118.2.fasta	0.4654	0.0308385		515982.2.fasta	66.56	0.0801398
340054.2.fasta	0.4291	0.0187368		537874.2.fasta	0.4051	0.079681		6666666.3763.fasta	0.6301	0.0590343		326036.2.fasta	0.3428	0.0414516		546807.2.fasta	64.83	0.0356899
338107.2.fasta	0.4493	0.0773259		648017.2.fasta	0.3357	0.132935		6666666.3844.fasta	0.665	0.0646011		255131.1.fasta	0.6068	0.154974		491003.2.fasta	39.9	0.0217327
496396.2.fasta	0.6218	0.0384		330397.2.fasta	0.3621	0.123713		215158.1.fasta	0.5085	0.0569457		28369.1.fasta	0.6353	0.0684799		413066.2.fasta	41.61	0.061007
10867.1.fasta	0.4055	0.253402		424716.2.fasta	0.4613	0.0365685		6666666.3719.fasta	0.6365	0.0204647		431891.2.fasta	0.6045	0.167639		151528.1.fasta	53.21	0.320009
207597.1.fasta	0.5062	0.0478261		6666666.3755.fasta	0.6155	0.0152607		561998.2.fasta	0.5955	0.0365804		563124.2.fasta	0.665	0.131846		979535.3.fasta	42.86	0.0129074
561998.2.fasta	0.5955	0.0600236		760939.3.fasta	0.4003	0.0176056		67571.2.fasta	0.4389	0.0480227		374527.2.fasta	0.3599	0.0909723		320849.3.fasta	35.72	0.0570761
67571.2.fasta	0.4389	0.0233397		320842.3.fasta	0.3501	0.0957694		320845.3.fasta	0.3572	0.0937472		373412.2.fasta	0.6142	0.0491336		187764.2.fasta	45.25	0.199323
540068.2.fasta	0.6326	0.0444705		279530.3.fasta	0.5445	0.0332853		6666666.3816.fasta	0.6639	0.0628477		347329.2.fasta	0.5494	0.0558894		532075.2.fasta	49.94	0.0391729
320845.3.fasta	0.3572	0.0249507		10879.1.fasta	0.5582	0.0242716		373126.3.fasta	0.5083	0.0211123		260121.2.fasta	0.6325	0.041423		670252.3.fasta	56.76	0.0270551
338109.2.fasta	0.4509	0.0837415		578234.2.fasta	0.3704	0.0539863		576790.2.fasta	0.3952	0.0144906		6666666.3911.fasta	0.6467	0.0300738		287412.2.fasta	34.97	0.124796
576790.2.fasta	0.3952	0.0150325		6666666.3731.fasta	0.6639	0.0537644		632112.2.fasta	0.374	0.0689742		90410.1.fasta	0.3907	0.0637857		6666666.3808.fasta	63.42	0.0195286
632112.2.fasta	0.374	0.0268386		264729.3.fasta	0.6286	0.262044		194802.1.fasta	0.4952	0.0441918		575608.2.fasta	0.3491	0.0229893		334856.3.fasta	62.39	0.0459744
373413.2.fasta	0.6734	0.102677		47049.2.fasta	0.4864	0.0196309		551895.2.fasta	0.461	0.298526		373407.2.fasta	0.6672	0.10939		347325.2.fasta	53.56	0.0161346
445700.3.fasta	0.3785	0.00874318		320837.3.fasta	0.3373	0.0504158		881953.3.fasta	0.3269	0.102438		644007.2.fasta	0.3949	0.0851287		151537.1.fasta	35.68	0.0724177
591487.2.fasta	0.6748	0.104468		445686.3.fasta	0.3912	0.0384675		6666666.3798.fasta	0.6384	0.0212094		259901.1.fasta	0.3353	0.0713358		33771.1.fasta	55.85	0.0402791
10759.1.fasta	0.499	0.0153596		340054.2.fasta	0.4291	0.0204279		10679.1.fasta	0.5017	0.0362437		225725.1.fasta	0.3769	0.0472408		418443.2.fasta	49.84	0.0361837
563769.2.fasta	0.5091	0.0452706		6666666.3766.fasta	0.6646	0.075012		10747.1.fasta	0.3883	0.130973		382685.2.fasta	0.371	0.0367322		103807.1.fasta	49.35	0.0263196
338113.2.fasta	0.4473	0.0716817		496396.2.fasta	0.6218	0.0155661		641487.2.fasta	0.3438	0.0354724		444474.2.fasta	0.3597	0.0909723		6666666.3772.fasta	61.43	0.00675943
338138.2.fasta	0.4579	0.0811434		207597.1.fasta	0.5062	0.11325		10658.1.fasta	0.4809	0.0875182		447909.2.fasta	0.4479	0.0749716		6666666.3890.fasta	61.33	0.00719473
582382.2.fasta	0.5558	0.0280538		6666666.3844.fasta	0.665	0.075703		6666666.3883.fasta	0.6296	0.0597534		540066.2.fasta	0.6357	0.043925		346882.2.fasta	36.87	0.0656817
10679.1.fasta	0.5017	0.0213755		215158.1.fasta	0.5085	0.086477		376821.2.fasta	0.4158	0.0288208		180816.1.fasta	0.4939	0.0635733		6666666.3871.fasta	61.02	0.0273688
10747.1.fasta	0.3883	0.0821514		6666666.3719.fasta	0.6365	0.0344384		293178.2.fasta	0.3951	0.0288949		532076.2.fasta	0.4839	0.0549091		6666666.3774.fasta	61.37	0.0250697
546806.2.fasta	0.6474	0.133272		242527.1.fasta	0.6531	0.0789404		707757.5.fasta	0.4183	0.0128788		298338.3.fasta	0.3732	0.129995		151534.1.fasta	34.24	0.419971
641487.2.fasta	0.3438	0.0417435		561998.2.fasta	0.5955	0.00938694		503388.2.fasta	0.3366	0.154434		294631.3.fasta	0.306	0.162079		347326.2.fasta	44.89	0.0344197
10658.1.fasta	0.4809	0.0829235		67571.2.fasta	0.4389	0.0375836		6666666.3730.fasta	0.6468	0.0485421		320840.3.fasta	0.3511	0.0299117		683735.2.fasta	42.44	0.0258694
376821.2.fasta	0.4158	0.0290095		196242.1.fasta	0.5061	0.0759389		6666666.3839.fasta	0.6453	0.0188008		374529.2.fasta	0.3583	0.0909723		348058.2.fasta	47.26	0.0207871
338133.2.fasta	0.4581	0.0813707		540068.2.fasta	0.6326	0.0154232		244310.1.fasta	0.6364	0.0424741		130478.1.fasta	0.3331	0.0645537		198541.1.fasta	38.57	0.0534184
373408.2.fasta	0.6153	0.0855372		320845.3.fasta	0.3572	0.125491		505292.2.fasta	0.6451	0.114636		469660.2.fasta	0.4089	0.17872		225067.3.fasta	41.04	0.862809
293178.2.fasta	0.3951	0.0159001		6666666.3816.fasta	0.6639	0.074066		6666666.3804.fasta	0.6297	0.0598721		673835.2.fasta	0.3461	0.076024		10685.2.fasta	39.96	0.0321761
503388.2.fasta	0.3366	0.0953917		576790.2.fasta	0.3952	0.0182159		49964.1.fasta	0.6775	0.0742628		151599.3.fasta	0.6316	0.14537		120086.1.fasta	54.5	0.0246203
198540.1.fasta	0.3803	0.0170917		632112.2.fasta	0.374	0.034796		1032362.3.fasta	0.3083	0.0710745		321023.5.fasta	0.4391	0.0430671		861045.5.fasta	66.88	0.045961
388452.2.fasta	0.3511	0.0330935		373413.2.fasta	0.6734	0.047134		35238.1.fasta	0.2679	0.197292		293644.3.fasta	0.5008	0.105735		127509.3.fasta	45.66	0.0988721
10702.1.fasta	0.7114	0.0795578		445700.3.fasta	0.3785	0.0270743		470314.2.fasta	0.519	0.144901		151536.1.fasta	0.3532	0.0621488		66797.1.fasta	34.64	0.0672557
268748.3.fasta	0.3876	0.01675		591487.2.fasta	0.6748	0.0482075		655098.2.fasta	0.5502	0.119954		205874.1.fasta	0.6896	0.0627394		10753.2.fasta	37.32	0.12294
244310.1.fasta	0.6364	0.04942		10759.1.fasta	0.499	0.0125174		6666666.3815.fasta	0.5968	0.0434901		103216.1.fasta	0.5172	0.085719		879630.3.fasta	43	0.0254606
505292.2.fasta	0.6451	0.0561106		194802.1.fasta	0.4952	0.0210403		348137.2.fasta	0.6154	0.0581713		10693.2.fasta	0.3525	0.0704905		345922.2.fasta	34.94	0.142161
49964.1.fasta	0.6775	0.0757773		563769.2.fasta	0.5091	0.028055		872294.5.fasta	0.3402	0.0848948		476523.2.fasta	0.6233	0.106754		221029.1.fasta	47.43	0.0407999
189836.1.fasta	0.6428	0.281921		551895.2.fasta	0.461	0.0709983		6666666.3757.fasta	0.6381	0.0239483		561996.2.fasta	0.6677	0.0788607		347324.2.fasta	62.08	0.0307753
10704.2.fasta	0.5895	0.0237657		582382.2.fasta	0.5558	0.00798524		926543.3.fasta	0.6166	0.392695		205876.1.fasta	0.609	0.0506324		37554.1.fasta	49.79	0.0483557
338136.2.fasta	0.4632	0.079185		6666666.3798.fasta	0.6384	0.0424242		360398.2.fasta	0.3347	0.0666056		10778.1.fasta	0.3766	0.101447		451705.2.fasta	44.02	0.0159829
470314.2.fasta	0.519	0.0379065		157898.2.fasta	0.2527	0.237508		674082.2.fasta	0.5237	0.0270299		663241.2.fasta	0.3439	0.0640806		330398.2.fasta	40.82	0.0765778
204090.1.fasta	0.2932	0.0808098		10679.1.fasta	0.5017	0.04187		6666666.3793.fasta	0.6652	0.0636944		12017.1.fasta	0.5138	0.507541		866889.3.fasta	48.93	0.00690256
348137.2.fasta	0.6154	0.0293041		10747.1.fasta	0.3883	0.0996182		6666666.3841.fasta	0.6428	0.0153846		110457.1.fasta	0.5063	0.04025		546183.2.fasta	62.92	0.047883
384359.2.fasta	0.5992	0.320566		546806.2.fasta	0.6474	0.019063		6666666.3794.fasta	0.6651	0.0636944		543152.2.fasta	0.6834	0.0619848		36343.2.fasta	35.99	0.163213
279383.3.fasta	0.6212	0.0790227		641487.2.fasta	0.3438	0.0449386		6666666.3797.fasta	0.6363	0.0272857		633135.2.fasta	0.3899	0.12508		673839.2.fasta	37.78	0.0415427
360398.2.fasta	0.3347	0.0561838		10658.1.fasta	0.4809	0.0412588		6666666.3720.fasta	0.6477	0.0492453		10690.1.fasta	0.4001	0.229049		10710.1.fasta	49.86	0.0724411
674082.2.fasta	0.5237	0.0783265		376821.2.fasta	0.4158	0.0319269		6666666.3885.fasta	0.6476	0.0495319		35241.1.fasta	0.3622	0.0458896		459291.2.fasta	38.48	0.0829221
359962.2.fasta	0.3513	0.039046		293178.2.fasta	0.3951	0.0168969		204270.1.fasta	0.623	0.0870114		541865.2.fasta	0.3042	0.067201		329381.8.fasta	43.52	0.0237405
10871.1.fasta	0.6149	0.261527		707757.5.fasta	0.4183	0.0244721		320850.3.fasta	0.3596	0.14711		63118.1.fasta	0.3435	0.0376763		6666666.3892.fasta	63.87	0.0174773
373411.2.fasta	0.5966	0.0613035		503388.2.fasta	0.3366	0.218918		75320.1.fasta	0.426	0.140832		331627.2.fasta	0.6088	0.0852071		475178.2.fasta	33.69	0.31611
204270.1.fasta	0.623	0.0313595		388452.2.fasta	0.3511	0.024308		6666666.3842.fasta	0.6113	0.0452015		393598.2.fasta	0.6174	0.0774779		6666666.3709.fasta	62.86	0.0111985
320850.3.fasta	0.3596	0.0364774		6666666.3730.fasta	0.6468	0.0235919		767806.3.fasta	0.3458	0.108268		52979.1.fasta	0.4306	0.343473		205880.1.fasta	57.31	0.105239
75320.1.fasta	0.426	0.00964003		6666666.3839.fasta	0.6453	0.0260166		355246.2.fasta	0.4428	0.0548993		227470.1.fasta	0.4278	0.0602539		444860.3.fasta	40.43	0.0190963
462590.2.fasta	0.6426	0.0773614		268748.3.fasta	0.3876	0.0117319		55510.3.fasta	0.3026	0.102116		337828.3.fasta	0.44	0.105733		6666666.3783.fasta	66.52	0.0461896
355246.2.fasta	0.4428	0.0747178		244310.1.fasta	0.6364	0.0515924		280701.3.fasta	0.6317	0.0297769		555603.2.fasta	0.6384	0.0408915		10754.1.fasta	47.08	0.0444556
55510.3.fasta	0.3026	0.0238874		505292.2.fasta	0.6451	0.0725362		256994.2.fasta	0.3753	0.482313		12021.1.fasta	0.4653	0.252154		669008.3.fasta	48.73	0.0114064
480808.2.fasta	0.6727	0.0622929		35238.1.fasta	0.2679	0.147557		6666666.3888.fasta	0.6473	0.0499133		78541.1.fasta	0.3856	0.0387986		6666666.3741.fasta	60.73	0.0126369
338122.2.fasta	0.4439	0.0714074		10704.2.fasta	0.5895	0.0283159		6666666.3740.fasta	0.6369	0.0169858		40522.2.fasta	0.3668	0.0672098		227940.1.fasta	52.11	0.0708131
43685.1.fasta	0.3546	0.011044		470314.2.fasta	0.519	0.0134299		43685.1.fasta	0.3546	0.195984		12407.1.fasta	0.5283	0.0629807		6666666.3810.fasta	61.05	0.0260844
12018.1.fasta	0.4786	0.148976		204090.1.fasta	0.2932	0.185521		45406.2.fasta	0.3534	0.124097		387910.2.fasta	0.3474	0.0570996		6666666.3848.fasta	63.88	0.0164821
552525.2.fasta	0.3642	0.0295267		6666666.3815.fasta	0.5968	0.00953841		442493.2.fasta	0.3574	0.0429404		55511.2.fasta	0.3425	0.0585078		179237.1.fasta	61.49	0.123688
387908.2.fasta	0.3459	0.0650304		872294.5.fasta	0.3402	0.211185		6666666.3862.fasta	0.6385	0.0258438		543153.2.fasta	0.5629	0.0304064		136084.1.fasta	46.16	0.0558198
563119.2.fasta	0.6177	0.0852338		6666666.3757.fasta	0.6381	0.0325838		386792.2.fasta	0.6232	0.0809897		198543.1.fasta	0.3971	0.209986		194699.1.fasta	65.41	0.139833
45406.2.fasta	0.3534	0.0109268		384359.2.fasta	0.5992	0.105005		194966.1.fasta	0.4723	0.0525471		71366.1.fasta	0.3355	0.0623871		504346.2.fasta	56.26	0.041882
213236.1.fasta	0.665	0.112108		279383.3.fasta	0.6212	0.0351372		369257.2.fasta	0.4719	0.0290121		335797.2.fasta	0.6068	0.161079		12402.1.fasta	39.64	0.116918
546184.2.fasta	0.6757	0.0985653		360398.2.fasta	0.3347	0.148191		6666666.3830.fasta	0.673	0.0409013		532078.2.fasta	0.4727	0.061653		354260.3.fasta	35.37	0.0520488
442493.2.fasta	0.3574	0.0574934		674082.2.fasta	0.5237	0.0179921		387905.2.fasta	0.3416	0.0562659		496874.2.fasta	0.4549	0.101199		244590.2.fasta	38.5	0.0865191
39804.2.fasta	0.5124	0.100122		6666666.3793.fasta	0.6652	0.075703		673837.2.fasta	0.3455	0.0679237		627480.2.fasta	0.6287	0.106754		205875.1.fasta	65.38	0.0635998
386792.2.fasta	0.6232	0.0415068		658401.2.fasta	0.523	0.0335118		330396.2.fasta	0.351	0.256406		230871.1.fasta	0.3463	0.0417231		387909.2.fasta	32.99	0.104223
540067.2.fasta	0.6343	0.0441281		6666666.3841.fasta	0.6428	0.0256886		6666666.3827.fasta	0.6646	0.0640394		146269.2.fasta	0.4428	0.0965775		6666666.3708.fasta	66.62	0.0531497
489828.2.fasta	0.4483	0.0873057		309181.2.fasta	0.3913	0.0555924		29252.1.fasta	0.5309	0.0298844		374526.2.fasta	0.3573	0.0343265		12390.1.fasta	35.51	0.208737
194966.1.fasta	0.4723	0.0207395		6666666.3794.fasta	0.6651	0.0756344		560178.2.fasta	0.3926	0.0544253		279281.3.fasta	0.4459	0.0422052		431894.2.fasta	63.05	0.0494176
369257.2.fasta	0.4719	0.0372367		359962.2.fasta	0.3513	0.126552		417280.2.fasta	0.5589	0.03399		493906.2.fasta	0.4889	0.0972453		537874.2.fasta	40.51	0.318251
387905.2.fasta	0.3416	0.0648887		6666666.3797.fasta	0.6363	0.0273299		6666666.3737.fasta	0.6753	0.0571394		83129.2.fasta	0.3468	0.037934		648017.2.fasta	33.57	0.0934878
373404.2.fasta	0.6474	0.133272		6666666.3720.fasta	0.6477	0.0186781		97081.1.fasta	0.4991	0.0846502		12023.1.fasta	0.5421	0.493359		330397.2.fasta	36.21	0.101384
338115.2.fasta	0.4484	0.0802202		373411.2.fasta	0.5966	0.0104655		370623.2.fasta	0.7119	0.137158		627087.2.fasta	0.3672	0.0700462		424716.2.fasta	46.13	0.0126143
330396.2.fasta	0.351	0.0448113		6666666.3885.fasta	0.6476	0.0181724		6666666.3781.fasta	0.6656	0.0311303		227720.1.fasta	0.4832	0.0569638		753085.3.fasta	60.72	0.0284366
403905.2.fasta	0.3965	0.0331292		204270.1.fasta	0.623	0.018335		129861.2.fasta	0.511	0.168311		373415.2.fasta	0.5685	0.047904		6666666.3784.fasta	66.79	0.0311926
29252.1.fasta	0.5309	0.0205036		320850.3.fasta	0.3596	0.0881257		320847.3.fasta	0.3553	0.0509225		673375.2.fasta	0.5458	0.0798596		6666666.3755.fasta	61.55	0.0064758
223524.1.fasta	0.4337	0.306359		75320.1.fasta	0.426	0.0189399		6666666.3870.fasta	0.6649	0.0639187		262071.2.fasta	0.2873	0.332803		760939.3.fasta	40.03	0.0228988
338110.2.fasta	0.4435	0.0854655		462590.2.fasta	0.6426	0.0210302		925986.3.fasta	0.4383	0.017068		10665.1.fasta	0.353	0.0856628		747763.5.fasta	66.25	0.0381635
560178.2.fasta	0.3926	0.0275805		6666666.3842.fasta	0.6113	0.0439797		326036.2.fasta	0.3428	0.0824479		173443.1.fasta	0.4752	0.0545592		279530.3.fasta	54.45	0.0506106
470865.2.fasta	0.2894	0.0830771		355246.2.fasta	0.4428	0.0393044		255131.1.fasta	0.6068	0.152941		529929.2.fasta	0.5086	0.0376484		10879.1.fasta	55.82	0.0384657
417280.2.fasta	0.5589	0.0237962		55510.3.fasta	0.3026	0.0857831		10752.2.fasta	0.413	0.0355703		10742.1.fasta	0.4948	0.0361503		578234.2.fasta	37.04	0.107231
540065.2.fasta	0.6371	0.0460713		280701.3.fasta	0.6317	0.16168		6666666.3851.fasta	0.6856	0.065511		320846.3.fasta	0.3537	0.0221363		910473.3.fasta	63.71	0.0296141
581037.2.fasta	0.5559	0.0277954		6666666.3888.fasta	0.6473	0.0174621		444862.3.fasta	0.3764	0.0471754		186153.1.fasta	0.3347	0.0585078		93224.1.fasta	22.65	0.353498
532077.2.fasta	0.5325	0.0201606		6666666.3740.fasta	0.6369	0.0303014		431891.2.fasta	0.6045	0.0272445		10761.1.fasta	0.4747	0.0480906		6666666.3731.fasta	66.39	0.0549906
370623.2.fasta	0.7119	0.0944363		43685.1.fasta	0.3546	0.106948		6666666.3854.fasta	0.6646	0.0637868		157924.1.fasta	0.3915	0.0780887		264729.3.fasta	62.86	0.0419021
546185.2.fasta	0.6284	0.0286848		12018.1.fasta	0.4786	0.0505716		347329.2.fasta	0.5494	0.0187122		139871.2.fasta	0.364	0.0340247		6666666.3782.fasta	61.24	0.0258129
129861.2.fasta	0.511	0.0338636		387908.2.fasta	0.3459	0.144668		260121.2.fasta	0.6325	0.254538		320841.3.fasta	0.3599	0.0329252		47049.2.fasta	48.64	0.0420423
338135.2.fasta	0.4646	0.082569		563119.2.fasta	0.6177	0.283771		6666666.3911.fasta	0.6467	0.0504192		255431.1.fasta	0.5149	0.338362		6666666.3790.fasta	58.78	0.011432
405947.2.fasta	0.3556	0.0341502		45406.2.fasta	0.3534	0.0281206		743813.3.fasta	0.4949	0.0524425		35345.1.fasta	0.3538	0.0470225		6666666.3779.fasta	62.96	0.0118529
320847.3.fasta	0.3553	0.0313777		194948.1.fasta	0.4969	0.175834		6666666.3846.fasta	0.56	0.0519395		10730.1.fasta	0.4937	0.0663897		320837.3.fasta	33.73	0.0566516
526118.2.fasta	0.4654	0.0123249		127508.1.fasta	0.4724	0.0497816		6666666.3758.fasta	0.6599	0.0953586		101570.3.fasta	0.4859	0.0620002		445686.3.fasta	39.12	0.0224514
326036.2.fasta	0.3428	0.0622892		213236.1.fasta	0.665	0.0693726		499235.2.fasta	0.5898	0.0589219		194701.2.fasta	0.5249	0.0998515		340054.2.fasta	42.91	0.0264982
338131.2.fasta	0.4628	0.081118		546184.2.fasta	0.6757	0.0482845		259901.1.fasta	0.3353	0.0690284		330399.2.fasta	0.355	0.0938345		6666666.3766.fasta	66.46	0.0455658
255131.1.fasta	0.6068	0.0286404		442493.2.fasta	0.3574	0.0375723		225725.1.fasta	0.3769	0.0511688		644563.2.fasta	0.428	0.071234		496396.2.fasta	62.18	0.0448165
10752.2.fasta	0.413	0.0295143		6666666.3862.fasta	0.6385	0.0404138		444859.3.fasta	0.4114	0.0478457		374525.2.fasta	0.3571	0.0692473		6666666.3763.fasta	63.01	0.0108987
173707.1.fasta	0.3857	0.014914		386792.2.fasta	0.6232	0.0205115		447909.2.fasta	0.4479	0.079135		332032.3.fasta	0.6482	0.177457		877240.4.fasta	40.82	0.0321779
444862.3.fasta	0.3764	0.0135739		540067.2.fasta	0.6343	0.0432012		6666666.3728.fasta	0.5996	0.0180442		430796.2.fasta	0.3304	0.0651382		207597.1.fasta	50.62	0.0394061
28369.1.fasta	0.6353	0.0473794		194966.1.fasta	0.4723	0.00683081		6666666.3821.fasta	0.6633	0.0638729		320834.3.fasta	0.343	0.0241459		6666666.3844.fasta	66.5	0.045686
431891.2.fasta	0.6045	0.0328344		369257.2.fasta	0.4719	0.0140943		557289.2.fasta	0.6287	0.0966539		342564.2.fasta	0.421	0.120933		215158.1.fasta	50.85	0.113413
563124.2.fasta	0.665	0.112108		6666666.3830.fasta	0.673	0.0636432		6666666.3823.fasta	0.6258	0.0181628		448384.2.fasta	0.405	0.0786303		6666666.3719.fasta	63.65	0.0144922
374527.2.fasta	0.3599	0.0132523		387905.2.fasta	0.3416	0.144668		298338.3.fasta	0.3732	0.0946898		540064.2.fasta	0.6339	0.04178		762906.5.fasta	52.08	0.0413995
373412.2.fasta	0.6142	0.0855372		373404.2.fasta	0.6474	0.01858		294631.3.fasta	0.306	0.0851073		446807.2.fasta	0.6364	0.164806		242527.1.fasta	65.31	0.0488215
347329.2.fasta	0.5494	0.0316837		330396.2.fasta	0.351	0.0354932		6666666.3713.fasta	0.6136	0.0190843		10678.1.fasta	0.4731	0.0742473		561998.2.fasta	59.55	0.0183086
260121.2.fasta	0.6325	0.0447866		403905.2.fasta	0.3965	0.0104408		320840.3.fasta	0.3511	0.102827		6666666.4038.fasta	0.6183	0.0471016		67571.2.fasta	43.89	0.0191958
90410.1.fasta	0.3907	0.0357718		6666666.3827.fasta	0.6646	0.0756002		673835.2.fasta	0.3461	0.0680439		326037.2.fasta	0.349	0.0347913		196242.1.fasta	50.61	0.0804235
575608.2.fasta	0.3491	0.0677605		29252.1.fasta	0.5309	0.0363819		151599.3.fasta	0.6316	0.0731799		414970.2.fasta	0.4912	0.05778		540068.2.fasta	63.26	0.0307166
373407.2.fasta	0.6672	0.0372806		470865.2.fasta	0.2894	0.179882		321023.5.fasta	0.4391	0.177637		31754.1.fasta	0.3497	0.0516773		6666666.3816.fasta	66.39	0.0434657
499235.2.fasta	0.5898	0.0409007		417280.2.fasta	0.5589	0.00887125		293644.3.fasta	0.5008	0.00895033		186152.1.fasta	0.3335	0.0638601		373126.3.fasta	50.83	0.0125309
644007.2.fasta	0.3949	0.0275999		6666666.3737.fasta	0.6753	0.0606528		103216.1.fasta	0.5172	0.0381349		31537.1.fasta	0.3631	0.0416688		576790.2.fasta	39.52	0.0200735
39803.2.fasta	0.4854	0.0830658		540065.2.fasta	0.6371	0.0387958		6666666.3761.fasta	0.6468	0.0507163		563122.2.fasta	0.6126	0.0608088		632112.2.fasta	37.4	0.0622889
75725.1.fasta	0.5082	0.0833791		581037.2.fasta	0.5559	0.00811736		10693.2.fasta	0.3525	0.0615853		423476.2.fasta	0.3748	0.0565273		373413.2.fasta	67.34	0.0466336
329852.2.fasta	0.5212	0.123883		97081.1.fasta	0.4991	0.0286155		760732.3.fasta	0.3901	0.0134045		513550.2.fasta	0.3865	0.0307448		593131.7.fasta	53.45	0.0155891
259901.1.fasta	0.3353	0.0481827		532077.2.fasta	0.5325	0.0226019		10778.1.fasta	0.3766	0.115858		155148.1.fasta	0.4669	0.0483553		445700.3.fasta	37.85	0.029492
46014.1.fasta	0.3196	0.13694		370623.2.fasta	0.7119	0.107242		663241.2.fasta	0.3439	0.0445463		112023.1.fasta	0.3873	0.0441771		591487.2.fasta	67.48	0.0415576
225725.1.fasta	0.3769	0.15481		546185.2.fasta	0.6284	0.0439182		6666666.3863.fasta	0.6648	0.0622114		399185.2.fasta	0.3491	0.0690425		10759.1.fasta	49.9	0.039713
444859.3.fasta	0.4114	0.0115155		315953.2.fasta	0.4123	0.136115		318595.2.fasta	0.4832	0.0297573		693582.2.fasta	0.5891	0.0589853		563769.2.fasta	50.91	0.0290365
382685.2.fasta	0.371	0.0292036		129861.2.fasta	0.511	0.0811985		445688.3.fasta	0.3709	0.0306177		330395.2.fasta	0.3604	0.114533		551895.2.fasta	46.1	0.0240729
444474.2.fasta	0.3597	0.0246638		405947.2.fasta	0.3556	0.141436		12017.1.fasta	0.5138	0.0738975		242861.1.fasta	0.6065	0.122044		582382.2.fasta	55.58	0.0638827
447909.2.fasta	0.4479	0.0215517		320847.3.fasta	0.3553	0.105278		110457.1.fasta	0.5063	0.0229031		637730.2.fasta	0.504	0.0648088		881953.3.fasta	32.69	0.0761363
540066.2.fasta	0.6357	0.0483319		6666666.3870.fasta	0.6649	0.0747157		318594.2.fasta	0.4823	0.0483951						6666666.3798.fasta	63.84	0.0158243
10870.1.fasta	0.4075	0.231191		526118.2.fasta	0.4654	0.0136895		633135.2.fasta	0.3899	0.0338131				0.0822102		157898.2.fasta	25.27	0.148195
532076.2.fasta	0.4839	0.0186465		326036.2.fasta	0.3428	0.1415		10690.1.fasta	0.4001	0.0480616				0.0716827		10679.1.fasta	50.17	0.105324
557289.2.fasta	0.6287	0.189482		10752.2.fasta	0.413	0.0160926		35241.1.fasta	0.3622	0.048538						10747.1.fasta	38.83	0.102706
105154.1.fasta	0.4094	0.0353692		6666666.3851.fasta	0.6856	0.0645117		541865.2.fasta	0.3042	0.157346						6666666.13472.fasta	63.94	0.0139755
298338.3.fasta	0.3732	0.0238658		173707.1.fasta	0.3857	0.201791		63118.1.fasta	0.3435	0.0694222						546806.2.fasta	64.74	0.0441613
329855.2.fasta	0.5026	0.108225		444862.3.fasta	0.3764	0.0228546		331627.2.fasta	0.6088	0.257182						641487.2.fasta	34.38	0.0532695
438482.2.fasta	0.5497	0.0422464		28369.1.fasta	0.6353	0.0179751		393598.2.fasta	0.6174	0.163797						6666666.3883.fasta	62.96	0.0113118
294631.3.fasta	0.306	0.034359		6666666.3854.fasta	0.6646	0.0743721		52979.1.fasta	0.4306	0.0717843						376821.2.fasta	41.58	0.0722862
161736.1.fasta	0.5521	0.0372805		563124.2.fasta	0.665	0.0693166		538979.2.fasta	0.5564	0.0327875						373408.2.fasta	61.53	0.0703219
320840.3.fasta	0.3511	0.0236794		374527.2.fasta	0.3599	0.057156		6666666.3853.fasta	0.6376	0.0274999						293178.2.fasta	39.51	0.0238662
338119.2.fasta	0.4445	0.0773096		347329.2.fasta	0.5494	0.00809609		227470.1.fasta	0.4278	0.0227611						707757.5.fasta	41.83	0.0273536
374529.2.fasta	0.3583	0.0246638		260121.2.fasta	0.6325	0.0335056		337828.3.fasta	0.44	0.0118553						503388.2.fasta	33.66	0.0780935
130478.1.fasta	0.3331	0.0428472		6666666.3911.fasta	0.6467	0.0173857		714583.4.fasta	0.4706	0.0263362						198540.1.fasta	38.03	0.0823182
469660.2.fasta	0.4089	0.0185944		90410.1.fasta	0.3907	0.0435464		12021.1.fasta	0.4653	0.0837735						388452.2.fasta	35.11	0.0366023
338134.2.fasta	0.458	0.0793415		6666666.3846.fasta	0.56	0.014368		78541.1.fasta	0.3856	0.054635						6666666.3730.fasta	64.68	0.0180068
673835.2.fasta	0.3461	0.0734205		575608.2.fasta	0.3491	0.106901		12407.1.fasta	0.5283	0.0567994						6666666.3839.fasta	64.53	0.0123025
321023.5.fasta	0.4391	0.00814675		466051.2.fasta	0.5776	0.0722527		387910.2.fasta	0.3474	0.0729721						268748.3.fasta	38.76	0.0781673
293644.3.fasta	0.5008	0.0751629		644007.2.fasta	0.3949	0.0971028		445684.3.fasta	0.4125	0.0518491						505292.2.fasta	64.51	0.051939
151536.1.fasta	0.3532	0.0616362		259901.1.fasta	0.3353	0.100013		55511.2.fasta	0.3425	0.136032						6666666.3804.fasta	62.97	0.0103316
205874.1.fasta	0.6896	0.139025		280702.3.fasta	0.251	0.272106		198543.1.fasta	0.3971	0.0688005						49964.1.fasta	67.75	0.183349
103216.1.fasta	0.5172	0.0211068		225725.1.fasta	0.3769	0.0215669		71366.1.fasta	0.3355	0.0653114						1032362.3.fasta	30.83	0.105245
10693.2.fasta	0.3525	0.0143347		444859.3.fasta	0.4114	0.0187442		397353.2.fasta	0.6419	0.122236						189836.1.fasta	64.28	0.147523
476523.2.fasta	0.6233	0.0435841		382685.2.fasta	0.371	0.365749		6666666.3791.fasta	0.6748	0.0500315						10704.2.fasta	58.95	0.0239473
561996.2.fasta	0.6677	0.0506944		444474.2.fasta	0.3597	0.0985156		764562.3.fasta	0.3638	0.027515						470314.2.fasta	51.9	0.0193907
205876.1.fasta	0.609	0.0399926		447909.2.fasta	0.4479	0.0556076		627480.2.fasta	0.6287	0.304391						204090.1.fasta	29.32	0.0668372
10778.1.fasta	0.3766	0.0204822		6666666.3728.fasta	0.5996	0.0291546		10862.3.fasta	0.5807	0.0891058						655098.2.fasta	55.02	0.00713157
10868.1.fasta	0.4371	0.247461		540066.2.fasta	0.6357	0.0324373		146269.2.fasta	0.4428	0.0661122						6666666.3815.fasta	59.68	0.00718521
318595.2.fasta	0.4832	0.0733829		6666666.3821.fasta	0.6633	0.0734828		416419.2.fasta	0.6489	0.0555277						872294.5.fasta	34.02	0.067009
445688.3.fasta	0.3709	0.0132389		180816.1.fasta	0.4939	0.0596808		279281.3.fasta	0.4459	0.212566						6666666.3757.fasta	63.81	0.0130139
12017.1.fasta	0.5138	0.142794		532076.2.fasta	0.4839	0.0205127		247080.1.fasta	0.569	0.468326						384359.2.fasta	59.92	0.250371
110457.1.fasta	0.5063	0.0323503		6666666.3823.fasta	0.6258	0.016629		59241.3.fasta	0.4034	0.114985						279383.3.fasta	62.12	0.0136554
543152.2.fasta	0.6834	0.107185		298338.3.fasta	0.3732	0.052773		6666666.3770.fasta	0.6465	0.0504192						926543.3.fasta	61.66	0.054292
489829.2.fasta	0.4522	0.0766365		438482.2.fasta	0.5497	0.0152855		83129.2.fasta	0.3468	0.0740284						360398.2.fasta	33.47	0.106446
318594.2.fasta	0.4823	0.0704365		6666666.3713.fasta	0.6136	0.0146563		6666666.3849.fasta	0.6292	0.062634						674082.2.fasta	52.37	0.00774445
633135.2.fasta	0.3899	0.164662		320840.3.fasta	0.3511	0.224433		227720.1.fasta	0.4832	0.0205825						6666666.3793.fasta	66.52	0.046257
10690.1.fasta	0.4001	0.0365305		374529.2.fasta	0.3583	0.0985156		673375.2.fasta	0.5458	0.0389982						658401.2.fasta	52.3	0.0174455
35241.1.fasta	0.3622	0.0307007		130478.1.fasta	0.3331	0.182035		10665.1.fasta	0.353	0.0415894						6666666.3841.fasta	64.28	0.017144
541865.2.fasta	0.3042	0.0624352		321023.5.fasta	0.4391	0.022596		248496.2.fasta	0.3875	0.201681						309181.2.fasta	39.13	0.0648538
63118.1.fasta	0.3435	0.0429723		293644.3.fasta	0.5008	0.0133719		173443.1.fasta	0.4752	0.0229548						6666666.3794.fasta	66.51	0.0460813
331627.2.fasta	0.6088	0.0341538		151536.1.fasta	0.3532	0.0851866		529929.2.fasta	0.5086	0.0232377						359962.2.fasta	35.13	0.105747
393598.2.fasta	0.6174	0.0464652		205874.1.fasta	0.6896	0.06307		10742.1.fasta	0.4948	0.0625462						6666666.3797.fasta	63.63	0.0142339
52979.1.fasta	0.4306	0.0241379		103216.1.fasta	0.5172	0.0454188		6666666.3734.fasta	0.6891	0.0835688						6666666.3720.fasta	64.77	0.0182058
538979.2.fasta	0.5564	0.0809266		6666666.3761.fasta	0.6468	0.0185483		186153.1.fasta	0.3347	0.065551						373411.2.fasta	59.66	0.0279264
338114.2.fasta	0.4447	0.0777422		10693.2.fasta	0.3525	0.0340564		6666666.3805.fasta	0.6484	0.052088						6666666.3885.fasta	64.76	0.0177296
227470.1.fasta	0.4278	0.00995406		476523.2.fasta	0.6233	0.0217021		10761.1.fasta	0.4747	0.0335675						204270.1.fasta	62.3	0.041107
555603.2.fasta	0.6384	0.0462733		760732.3.fasta	0.3901	0.0200345		879628.3.fasta	0.413	0.0223678						75320.1.fasta	42.6	0.0339658
484895.2.fasta	0.5225	0.0283519		10778.1.fasta	0.3766	0.0742429		320841.3.fasta	0.3599	0.133473						462590.2.fasta	64.26	0.0212313
12021.1.fasta	0.4653	0.147313		6666666.3863.fasta	0.6648	0.0753622		255431.1.fasta	0.5149	0.0978772						6666666.3842.fasta	61.13	0.0239304
78541.1.fasta	0.3856	0.0248152		318595.2.fasta	0.4832	0.039193		35345.1.fasta	0.3538	0.0502595						767806.3.fasta	34.58	0.0508
338127.2.fasta	0.4608	0.079703		445688.3.fasta	0.3709	0.023023		10730.1.fasta	0.4937	0.0432532						355246.2.fasta	44.28	0.0478446
40522.2.fasta	0.3668	0.0203716		12017.1.fasta	0.5138	0.0464401		101570.3.fasta	0.4859	0.0456277						55510.3.fasta	30.26	0.141501
12407.1.fasta	0.5283	0.0201871		110457.1.fasta	0.5063	0.0117545		330399.2.fasta	0.355	0.0459394						280701.3.fasta	63.17	0.0976323
387910.2.fasta	0.3474	0.0372687		543152.2.fasta	0.6834	0.063007		644563.2.fasta	0.428	0.030649						256994.2.fasta	37.53	0.0815731
338128.2.fasta	0.4603	0.079703		318594.2.fasta	0.4823	0.0396252		374525.2.fasta	0.3571	0.0554915						6666666.3888.fasta	64.73	0.0188461
445684.3.fasta	0.4125	0.0465773		35241.1.fasta	0.3622	0.0491574		6666666.3852.fasta	0.6656	0.0635437						6666666.3740.fasta	63.69	0.0150959
55511.2.fasta	0.3425	0.0544786		541865.2.fasta	0.3042	0.0814564		320834.3.fasta	0.343	0.167777						552525.2.fasta	36.42	0.0413867
543153.2.fasta	0.5629	0.0335922		331627.2.fasta	0.6088	0.0468287		342564.2.fasta	0.421	0.0425807						387908.2.fasta	34.59	0.0597116
198543.1.fasta	0.3971	0.0331597		393598.2.fasta	0.6174	0.0553174		344021.6.fasta	0.4978	0.0525089						563119.2.fasta	61.77	0.0679428
71366.1.fasta	0.3355	0.0562216		52979.1.fasta	0.4306	0.0635714		448384.2.fasta	0.405	0.0135254						45406.2.fasta	35.34	0.0481938
335797.2.fasta	0.6068	0.0387851		538979.2.fasta	0.5564	0.0172829		6666666.3893.fasta	0.6188	0.0707761						194948.1.fasta	49.69	0.0228007
397353.2.fasta	0.6419	0.0573277		6666666.3853.fasta	0.6376	0.0250836		6666666.3780.fasta	0.6645	0.0636944						213236.1.fasta	66.5	0.0492092
384848.2.fasta	0.5092	0.0412042		227470.1.fasta	0.4278	0.0217791		446807.2.fasta	0.6364	0.170832						546184.2.fasta	67.57	0.0510132
10680.1.fasta	0.4953	0.154461		337828.3.fasta	0.44	0.0443436		151538.1.fasta	0.3588	0.133913						442493.2.fasta	35.74	0.034931
10845.2.fasta	0.4521	0.0923065		555603.2.fasta	0.6384	0.0359538		645664.3.fasta	0.4044	0.010994						6666666.3862.fasta	63.85	0.0148215
532078.2.fasta	0.4727	0.0187918		484895.2.fasta	0.5225	0.0224935		10678.1.fasta	0.4731	0.0242764						386792.2.fasta	62.32	0.256177
496874.2.fasta	0.4549	0.0105072		12021.1.fasta	0.4653	0.0596703		700939.3.fasta	0.4033	0.0108816						540067.2.fasta	63.43	0.0575018
627480.2.fasta	0.6287	0.0367098		78541.1.fasta	0.3856	0.0400401		279303.3.fasta	0.7039	0.125885						369257.2.fasta	47.19	0.0626244
10862.3.fasta	0.5807	0.294721		40522.2.fasta	0.3668	0.0799934		6666666.4038.fasta	0.6183	0.0517041						6666666.3830.fasta	67.3	0.0613098
230871.1.fasta	0.3463	0.0435252		12407.1.fasta	0.5283	0.03372		326037.2.fasta	0.349	0.0729721						387905.2.fasta	34.16	0.0625397
146269.2.fasta	0.4428	0.0425499		387910.2.fasta	0.3474	0.144668		934027.3.fasta	0.2615	0.265115						673837.2.fasta	34.55	0.0538774
374526.2.fasta	0.3573	0.0261905		445684.3.fasta	0.4125	0.0140162		414970.2.fasta	0.4912	0.0794682						373404.2.fasta	64.74	0.0436221
279281.3.fasta	0.4459	0.0386115		55511.2.fasta	0.3425	0.104087		6666666.3872.fasta	0.6888	0.062566						330396.2.fasta	35.1	0.10045
10843.1.fasta	0.4569	0.0878317		543153.2.fasta	0.5629	0.0122866		157239.1.fasta	0.3994	0.0549058						403905.2.fasta	39.65	0.0667184
247080.1.fasta	0.569	0.283491		198543.1.fasta	0.3971	0.0107921		563122.2.fasta	0.6126	0.123426						6666666.3827.fasta	66.46	0.0446992
493906.2.fasta	0.4889	0.0208914		335797.2.fasta	0.6068	0.0785994		504553.3.fasta	0.5397	0.0928698						29252.1.fasta	53.09	0.0791764
83129.2.fasta	0.3468	0.0472473		384848.2.fasta	0.5092	0.0159369		279006.3.fasta	0.3967	0.0350731						223524.1.fasta	43.37	0.123098
12023.1.fasta	0.5421	0.167747		6666666.3791.fasta	0.6748	0.0604177		423476.2.fasta	0.3748	0.328107						326574.3.fasta	68.38	0.306475
627087.2.fasta	0.3672	0.0380508		10680.1.fasta	0.4953	0.0401217		155148.1.fasta	0.4669	0.0348883						560178.2.fasta	39.26	0.0569109
227720.1.fasta	0.4832	0.0322771		532078.2.fasta	0.4727	0.0246999		6666666.3869.fasta	0.6744	0.0492955						470865.2.fasta	28.94	0.0638321
10661.1.fasta	0.4217	0.0177766		627480.2.fasta	0.6287	0.0171021		112023.1.fasta	0.3873	0.0503641						417280.2.fasta	55.89	0.106249
373415.2.fasta	0.5685	0.0297977		10862.3.fasta	0.5807	0.0955319		399185.2.fasta	0.3491	0.105413						6666666.3737.fasta	67.53	0.0351568
673375.2.fasta	0.5458	0.057787		230871.1.fasta	0.3463	0.112983		693582.2.fasta	0.5891	0.0664952						540065.2.fasta	63.71	0.0787547
262071.2.fasta	0.2873	0.129831		146269.2.fasta	0.4428	0.0300703		242861.1.fasta	0.6065	0.0251833						581037.2.fasta	55.59	0.0556667
10665.1.fasta	0.353	0.0095031		374526.2.fasta	0.3573	0.0634031		637730.2.fasta	0.504	0.0121368						97081.1.fasta	49.91	0.0460917
173443.1.fasta	0.4752	0.0144981		279281.3.fasta	0.4459	0.0568735		310539.3.fasta	0.4396	0.0166117						532077.2.fasta	53.25	0.0227015
529929.2.fasta	0.5086	0.0346599		247080.1.fasta	0.569	0.217126										546185.2.fasta	62.84	0.0348871
10742.1.fasta	0.4948	0.0203175		6666666.3770.fasta	0.6465	0.0173857				0.0685593						6666666.3781.fasta	66.56	0.0517553
320846.3.fasta	0.3537	0.0338772		493906.2.fasta	0.4889	0.0254486				0.0599127						315953.2.fasta	41.23	0.0610104
186153.1.fasta	0.3347	0.0554906		227720.1.fasta	0.4832	0.011605										129861.2.fasta	51.1	0.0339779
10854.1.fasta	0.2289	0.21126		10661.1.fasta	0.4217	0.0256946										405947.2.fasta	35.56	0.0494303
338116.2.fasta	0.4449	0.0788029		373415.2.fasta	0.5685	0.0210998										320847.3.fasta	35.53	0.0530606
10761.1.fasta	0.4747	0.0207532		673375.2.fasta	0.5458	0.014116										6666666.3870.fasta	66.49	0.0445467
157924.1.fasta	0.3915	0.00722534		262071.2.fasta	0.2873	0.12045										925986.3.fasta	43.83	0.0152158
139871.2.fasta	0.364	0.0795102		10665.1.fasta	0.353	0.0280243										300186.2.fasta	35.66	0.0846613
320841.3.fasta	0.3599	0.0260223		173443.1.fasta	0.4752	0.0208759										526118.2.fasta	46.54	0.155027
255431.1.fasta	0.5149	0.0279884		529929.2.fasta	0.5086	0.0184736										326036.2.fasta	34.28	0.0640744
35345.1.fasta	0.3538	0.0404114		10742.1.fasta	0.4948	0.0280009										10752.2.fasta	41.3	0.0341363
101570.3.fasta	0.4859	0.02637		6666666.3734.fasta	0.6891	0.0752256										6666666.3851.fasta	68.56	0.0493473
194701.2.fasta	0.5249	0.0274404		320846.3.fasta	0.3537	0.0978778										173707.1.fasta	38.57	0.0563347
330399.2.fasta	0.355	0.0779099		186153.1.fasta	0.3347	0.219409										444862.3.fasta	37.64	0.0201532
644563.2.fasta	0.428	0.035572		6666666.3805.fasta	0.6484	0.0176549										28369.1.fasta	63.53	0.188046
374525.2.fasta	0.3571	0.0348506		10761.1.fasta	0.4747	0.0340268										431891.2.fasta	60.45	0.0885195
332032.3.fasta	0.6482	0.0561719		879628.3.fasta	0.413	0.0327272										6666666.3854.fasta	66.46	0.0442306
430796.2.fasta	0.3304	0.0447351		157924.1.fasta	0.3915	0.0749248										563124.2.fasta	66.5	0.066006
320834.3.fasta	0.343	0.0493963		139871.2.fasta	0.364	0.0767413										374527.2.fasta	35.99	0.16599
342564.2.fasta	0.421	0.0178385		320841.3.fasta	0.3599	0.0701426										373412.2.fasta	61.42	0.0997537
340435.2.fasta	0.4595	0.133442		35345.1.fasta	0.3538	0.0861006										260121.2.fasta	63.25	0.205225
448384.2.fasta	0.405	0.0335556		10730.1.fasta	0.4937	0.0596808										6666666.3911.fasta	64.67	0.0178562
338125.2.fasta	0.4473	0.0718294		101570.3.fasta	0.4859	0.0154156										743813.3.fasta	49.49	0.00713723
540064.2.fasta	0.6339	0.0441281		194701.2.fasta	0.5249	0.0445321										693627.2.fasta	38.19	0.0777052
446807.2.fasta	0.6364	0.0512059		330399.2.fasta	0.355	0.179651										6666666.3846.fasta	56	0.00451066
338101.2.fasta	0.4527	0.0866516		644563.2.fasta	0.428	0.0170114										575608.2.fasta	34.91	0.065513
10678.1.fasta	0.4731	0.0206945		576791.2.fasta	0.3889	0.0270966										6666666.3758.fasta	65.99	0.0397211
279303.3.fasta	0.7039	0.173194		374525.2.fasta	0.3571	0.0634031										373407.2.fasta	66.72	0.120721
338126.2.fasta	0.4455	0.0694561		6666666.3852.fasta	0.6656	0.0742907										861047.5.fasta	58.83	0.0092577
70203.1.fasta	0.4342	0.279771		430796.2.fasta	0.3304	0.0177506										499235.2.fasta	58.98	0.0288119
326037.2.fasta	0.349	0.0367627		320834.3.fasta	0.343	0.102102										466051.2.fasta	57.76	0.0381245
338137.2.fasta	0.4614	0.083667		342564.2.fasta	0.421	0.0554664										644007.2.fasta	39.49	0.0955588
414970.2.fasta	0.4912	0.0211385		340435.2.fasta	0.4595	0.0449816										259901.1.fasta	33.53	0.0758075
31754.1.fasta	0.3497	0.0337967		448384.2.fasta	0.405	0.0193851										225725.1.fasta	37.69	0.0638919
490913.2.fasta	0.4704	0.242203		6666666.3780.fasta	0.6645	0.0753567										444859.3.fasta	41.14	0.0283587
186152.1.fasta	0.3335	0.0438815		540064.2.fasta	0.6339	0.042691										382685.2.fasta	37.1	0.469435
31537.1.fasta	0.3631	0.0427694		446807.2.fasta	0.6364	0.0427446										444474.2.fasta	35.97	0.0760957
157239.1.fasta	0.3994	0.0321585		645664.3.fasta	0.4044	0.0184458										447909.2.fasta	44.79	0.210315
563122.2.fasta	0.6126	0.0842431		10678.1.fasta	0.4731	0.0485618										6666666.3728.fasta	59.96	0.00772134
423476.2.fasta	0.3748	0.0444043		700939.3.fasta	0.4033	0.0213552										540066.2.fasta	63.57	0.0799436
155148.1.fasta	0.4669	0.0217366		279303.3.fasta	0.7039	0.0670049										6666666.3821.fasta	66.33	0.0441794
482058.2.fasta	0.5802	0.312274		326037.2.fasta	0.349	0.163756										180816.1.fasta	49.39	0.0341562
112023.1.fasta	0.3873	0.0278082		31754.1.fasta	0.3497	0.119617										532076.2.fasta	48.39	0.0648295
399185.2.fasta	0.3491	0.0283474		6666666.3872.fasta	0.6888	0.0645005										557289.2.fasta	62.87	0.0467581
693582.2.fasta	0.5891	0.0430509		176106.2.fasta	0.3335	0.0937623										6666666.3823.fasta	62.58	0.00967112
330395.2.fasta	0.3604	0.0230711		490913.2.fasta	0.4704	0.0179136										298338.3.fasta	37.32	0.0570922
242861.1.fasta	0.6065	0.0418359		186152.1.fasta	0.3335	0.0337572										438482.2.fasta	54.97	0.0575832
637730.2.fasta	0.504	0.0420282		563122.2.fasta	0.6126	0.0513171										294631.3.fasta	30.6	0.260208
				423476.2.fasta	0.3748	0.149946										161736.1.fasta	55.21	0.0144984
		0.0609114		513550.2.fasta	0.3865	0.0550772										6666666.3713.fasta	61.36	0.0072263
		0.0569435		155148.1.fasta	0.4669	0.0101396										320840.3.fasta	35.11	0.113904
				6666666.3869.fasta	0.6744	0.0605242										374529.2.fasta	35.83	0.0795376
				482058.2.fasta	0.5802	0.0195902										130478.1.fasta	33.31	0.103909
				112023.1.fasta	0.3873	0.0840552										469660.2.fasta	40.89	0.0259743
				399185.2.fasta	0.3491	0.0751763										673835.2.fasta	34.61	0.0520373
				693582.2.fasta	0.5891	0.0172979										141904.3.fasta	44.62	0.0248551
				330395.2.fasta	0.3604	0.041492										321023.5.fasta	43.91	0.0246334
				242861.1.fasta	0.6065	0.0104157										293644.3.fasta	50.08	0.318401
				637730.2.fasta	0.504	0.0081945										151536.1.fasta	35.32	0.0792904
				310539.3.fasta	0.4396	0.0264234										103216.1.fasta	51.72	0.0677072
																6666666.3761.fasta	64.68	0.0185547
						0.0573759										10693.2.fasta	35.25	0.035825
						0.0520886										476523.2.fasta	62.33	0.0822681
																760732.3.fasta	39.01	0.0267011
																561996.2.fasta	66.77	0.0242189
																205876.1.fasta	60.9	0.0376582
																10778.1.fasta	37.66	0.095598
																663241.2.fasta	34.39	0.0592176
																6666666.3863.fasta	66.48	0.0446731
																445688.3.fasta	37.09	0.0226873
																110457.1.fasta	50.63	0.046383
																543152.2.fasta	68.34	0.0570651
																633135.2.fasta	38.99	0.0531994
																35241.1.fasta	36.22	0.102574
																541865.2.fasta	30.42	0.149105
																331627.2.fasta	60.88	0.0471195
																393598.2.fasta	61.74	0.0798681
																52979.1.fasta	43.06	0.114855
																538979.2.fasta	55.64	0.024877
																6666666.3853.fasta	63.76	0.0144712
																512792.2.fasta	34.64	0.0844808
																227470.1.fasta	42.78	0.040834
																459290.3.fasta	38.47	0.0870164
																337828.3.fasta	44	0.185319
																555603.2.fasta	63.84	0.0704178
																484895.2.fasta	52.25	0.0499156
																714583.4.fasta	47.06	0.010968
																40522.2.fasta	36.68	0.0642765
																12407.1.fasta	52.83	0.169481
																693628.2.fasta	38.98	0.0723549
																387910.2.fasta	34.74	0.0630823
																445684.3.fasta	41.25	0.0163363
																55511.2.fasta	34.25	0.0576706
																543153.2.fasta	56.29	0.0465793
																198543.1.fasta	39.71	0.0717085
																71366.1.fasta	33.55	0.11951
																335797.2.fasta	60.68	0.0331153
																397353.2.fasta	64.19	0.0526847
																384848.2.fasta	50.92	0.0399426
																6666666.3791.fasta	67.48	0.0341164
																10680.1.fasta	49.53	0.0489117
																764562.3.fasta	36.38	0.0520883
																532078.2.fasta	47.27	0.0573358
																496874.2.fasta	45.49	0.0358632
																627480.2.fasta	62.87	0.0426374
																10862.3.fasta	58.07	0.264689
																146269.2.fasta	44.28	0.0703384
																374526.2.fasta	35.73	0.0796763
																416419.2.fasta	64.89	0.0678652
																279281.3.fasta	44.59	0.133587
																247080.1.fasta	56.9	0.119061
																59241.3.fasta	40.34	0.0222091
																6666666.3770.fasta	64.65	0.0184604
																235266.2.fasta	36.94	0.0599412
																292639.2.fasta	49.53	0.0741092
																493906.2.fasta	48.89	0.0622618
																6666666.3849.fasta	62.92	0.0112067
																6666666.13471.fasta	68.83	0.0469298
																627087.2.fasta	36.72	0.123493
																227720.1.fasta	48.32	0.125628
																10661.1.fasta	42.17	0.0618241
																373415.2.fasta	56.85	0.0280825
																673375.2.fasta	54.58	0.0117101
																262071.2.fasta	28.73	0.0831623
																10665.1.fasta	35.3	0.0585999
																248496.2.fasta	38.75	0.0690599
																173443.1.fasta	47.52	0.0597239
																529929.2.fasta	50.86	0.0401193
																10742.1.fasta	49.48	0.157269
																6666666.3734.fasta	68.91	0.0530069
																320846.3.fasta	35.37	0.0773141
																186153.1.fasta	33.47	0.112135
																6666666.3805.fasta	64.84	0.0180515
																10761.1.fasta	47.47	0.205388
																879628.3.fasta	41.3	0.0226234
																864178.3.fasta	28.38	0.133725
																764561.3.fasta	37.3	0.046484
																139871.2.fasta	36.4	0.0441724
																320841.3.fasta	35.99	0.116247
																255431.1.fasta	51.49	0.0243295
																35345.1.fasta	35.38	0.0682475
																10730.1.fasta	49.37	0.0472771
																101570.3.fasta	48.59	0.0328787
																194701.2.fasta	52.49	0.127483
																330399.2.fasta	35.5	0.140825
																644563.2.fasta	42.8	0.0229742
																576791.2.fasta	38.89	0.0240495
																374525.2.fasta	35.71	0.0808478
																332032.3.fasta	64.82	0.221203
																6666666.3852.fasta	66.56	0.0464665
																430796.2.fasta	33.04	0.063301
																320834.3.fasta	34.3	0.446159
																340435.2.fasta	45.95	0.0250039
																344021.6.fasta	49.78	0.00407898
																448384.2.fasta	40.5	0.024652
																6666666.3893.fasta	61.88	0.0261038
																6666666.3780.fasta	66.45	0.0452869
																540064.2.fasta	63.39	0.0780672
																446807.2.fasta	63.64	0.0714452
																645664.3.fasta	40.44	0.0310715
																10678.1.fasta	47.31	0.0114231
																700939.3.fasta	40.33	0.0294784
																279303.3.fasta	70.39	0.171011
																6666666.4038.fasta	61.83	0.027011
																70203.1.fasta	43.42	0.25811
																326037.2.fasta	34.9	0.0735938
																934027.3.fasta	26.15	0.14931
																31754.1.fasta	34.97	0.245681
																6666666.3872.fasta	68.88	0.0482209
																176106.2.fasta	33.35	0.0914468
																490913.2.fasta	47.04	0.0373255
																186152.1.fasta	33.35	0.0810943
																31537.1.fasta	36.31	0.166998
																157239.1.fasta	39.94	0.157726
																563122.2.fasta	61.26	0.0624576
																504553.3.fasta	53.97	0.015952
																279006.3.fasta	39.67	0.0192145
																423476.2.fasta	37.48	0.0647365
																513550.2.fasta	38.65	0.257426
																155148.1.fasta	46.69	0.124903
																6666666.3869.fasta	67.44	0.0337185
																482058.2.fasta	58.02	0.0186546
																399185.2.fasta	34.91	0.0912082
																693582.2.fasta	58.91	0.0177115
																330395.2.fasta	36.04	0.0466631
																637730.2.fasta	50.4	0.00826308
																310539.3.fasta	43.96	0.0593851
																	avg	0.0685735
																	std dev	0.0788404

## Sheet: Sheet4
Phage_id	GC	Tail_fiber_kld		Phage_id	GC	Tail_kld		Phage_id	GC	Phage_experimental_kld
482822.2.fasta	0.5188	0.0313494		482822.2.fasta	0.5188	0.0390295		263374.1.fasta	0.6544	0.0531737
128975.2.fasta	0.5156	0.0287054		128975.2.fasta	0.5156	0.0413412		128975.2.fasta	0.5156	0.0413581
320848.3.fasta	0.3547	0.147027		6666666.3837.fasta	0.6285	0.0273151		180503.1.fasta	0.435	0.285657
35343.1.fasta	0.6262	0.0540881		665032.2.fasta	0.5628	0.0255069		320848.3.fasta	0.3547	0.0637965
379329.2.fasta	0.4907	0.128161		320848.3.fasta	0.3547	0.068438		35343.1.fasta	0.6262	0.134029
329886.3.fasta	0.4261	0.0138657		35343.1.fasta	0.6262	0.0635103		396034.2.fasta	0.4485	0.0644695
198110.2.fasta	0.4534	0.0441937		396034.2.fasta	0.4485	0.0998709		379329.2.fasta	0.4907	0.0225777
439809.2.fasta	0.6174	0.278742		6666666.3803.fasta	0.6393	0.020733		90963.1.fasta	0.4098	0.456718
85154.1.fasta	0.3826	0.0562092		6666666.3759.fasta	0.6175	0.0330197		665883.2.fasta	0.347	0.0573128
28358.2.fasta	0.5616	0.0663798		6666666.3729.fasta	0.6754	0.0341369		466052.2.fasta	0.5776	0.187857
254397.2.fasta	0.5105	0.0221951		665883.2.fasta	0.347	0.0699308		198110.2.fasta	0.4534	0.0054083
390978.2.fasta	0.4157	0.084511		466052.2.fasta	0.5776	0.132537		85154.1.fasta	0.3826	0.0273504
10724.1.fasta	0.437	0.0570979		198110.2.fasta	0.4534	0.0208691		28358.2.fasta	0.5616	0.0624665
180504.1.fasta	0.6119	0.0223666		668618.2.fasta	0.3399	0.0584408		209052.1.fasta	0.6333	0.0683393
77048.1.fasta	0.4631	0.0761522		439809.2.fasta	0.6174	0.0234338		114416.1.fasta	0.3584	0.297634
205879.1.fasta	0.6137	0.118398		6666666.3723.fasta	0.6651	0.0421188		151539.1.fasta	0.3304	0.0629757
12355.1.fasta	0.4555	0.0141655		85154.1.fasta	0.3826	0.0732937		10857.2.fasta	0.365	0.649175
233894.4.fasta	0.4104	0.0184057		28358.2.fasta	0.5616	0.0437019		254397.2.fasta	0.5105	0.0158909
260120.2.fasta	0.637	0.0784149		232237.1.fasta	0.5204	0.0360347		75590.1.fasta	0.2903	0.103925
205868.1.fasta	0.613	0.210629		6666666.3778.fasta	0.6896	0.0364714		222645.1.fasta	0.5579	0.0311236
10717.1.fasta	0.4269	0.387322		674081.2.fasta	0.5402	0.0367662		129009.1.fasta	0.3348	0.0703961
590739.2.fasta	0.474	0.13555		209052.1.fasta	0.6333	0.0597835		292029.3.fasta	0.3039	0.327066
294382.3.fasta	0.4174	0.0747304		114416.1.fasta	0.3584	0.0747207		10724.1.fasta	0.437	0.045902
398839.2.fasta	0.3468	0.133149		665033.2.fasta	0.5176	0.0152264		445517.2.fasta	0.3346	0.0698568
344022.2.fasta	0.4505	0.0317544		254397.2.fasta	0.5105	0.0635556		444878.3.fasta	0.3957	0.211459
70734.2.fasta	0.489	0.0195581		390978.2.fasta	0.4157	0.0422576		180504.1.fasta	0.6119	0.0601106
431893.2.fasta	0.6543	0.113899		445696.3.fasta	0.3812	0.11245		270673.3.fasta	0.4536	0.0108582
320832.3.fasta	0.2929	0.147555		129009.1.fasta	0.3348	0.0531248		77048.1.fasta	0.4631	0.0313248
538398.2.fasta	0.5493	0.041793		292029.3.fasta	0.3039	0.0784931		663554.2.fasta	0.646	0.032111
260827.3.fasta	0.5049	0.0809878		942165.3.fasta	0.5627	0.0422867		205879.1.fasta	0.6137	0.0868456
12417.1.fasta	0.3557	0.0275808		445517.2.fasta	0.3346	0.0464603		10872.1.fasta	0.4536	0.171261
230158.1.fasta	0.4246	0.0434474		444878.3.fasta	0.3957	0.0400666		233894.4.fasta	0.4104	0.196928
172667.1.fasta	0.4457	0.0144434		6666666.3865.fasta	0.6645	0.0342817		260120.2.fasta	0.637	0.041175
576789.2.fasta	0.4051	0.0213799		180504.1.fasta	0.6119	0.0705952		260373.1.fasta	0.6344	0.134153
322855.3.fasta	0.5189	0.0138194		6666666.3811.fasta	0.6375	0.016359		117575.1.fasta	0.4062	0.462876
50948.1.fasta	0.4044	0.0200288		663554.2.fasta	0.646	0.0801255		10717.1.fasta	0.4269	0.0418661
641832.2.fasta	0.4911	0.0317587		205879.1.fasta	0.6137	0.0201982		398839.2.fasta	0.3468	0.0516517
551790.2.fasta	0.6174	0.0370422		582345.3.fasta	0.5479	0.091836		344022.2.fasta	0.4505	0.0162825
329254.2.fasta	0.5107	0.037157		12355.1.fasta	0.4555	0.0559732		70734.2.fasta	0.489	0.285314
197310.2.fasta	0.3532	0.0163522		233894.4.fasta	0.4104	0.0396501		347327.2.fasta	0.4478	0.0302086
12353.1.fasta	0.3766	0.0180891		6666666.3726.fasta	0.6661	0.027197		431893.2.fasta	0.6543	0.0978012
347966.2.fasta	0.3526	0.0735137		6666666.3874.fasta	0.6651	0.0340524		320831.3.fasta	0.3142	0.0999377
564886.2.fasta	0.5111	0.0185174		260120.2.fasta	0.637	0.0137086		320832.3.fasta	0.2929	0.189896
12360.1.fasta	0.345	0.134801		260373.1.fasta	0.6344	0.052013		538398.2.fasta	0.5493	0.0849556
190478.1.fasta	0.2838	0.126749		205868.1.fasta	0.613	0.0310473		260827.3.fasta	0.5049	0.0111764
197783.1.fasta	0.5742	0.0230622		6666666.3724.fasta	0.6653	0.0351676		12417.1.fasta	0.3557	0.0552613
549446.2.fasta	0.5562	0.0431397		10717.1.fasta	0.4269	0.111665		230158.1.fasta	0.4246	0.0695074
546803.2.fasta	0.6472	0.0536139		590739.2.fasta	0.474	0.0857072		172667.1.fasta	0.4457	0.0346147
399183.2.fasta	0.4356	0.0101816		294382.3.fasta	0.4174	0.118381		343516.2.fasta	0.4897	0.0275761
31535.1.fasta	0.578	0.127955		398839.2.fasta	0.3468	0.0749624		576789.2.fasta	0.4051	0.0354188
115987.1.fasta	0.4388	0.0141567		70734.2.fasta	0.489	0.0424356		322855.3.fasta	0.5189	0.160957
459845.2.fasta	0.3979	0.202781		6666666.3769.fasta	0.6095	0.0147469		50948.1.fasta	0.4044	0.229276
528321.2.fasta	0.5973	0.0891661		6666666.3800.fasta	0.653	0.0152305		83201.1.fasta	0.4453	0.185374
215167.2.fasta	0.3346	0.115666		431893.2.fasta	0.6543	0.0581371		641832.2.fasta	0.4911	0.0105862
437329.2.fasta	0.5629	0.0390035		320832.3.fasta	0.2929	0.227192		318593.2.fasta	0.4826	0.230259
359961.2.fasta	0.3526	0.0746698		538398.2.fasta	0.5493	0.372625		51369.1.fasta	0.4489	0.0297409
205869.1.fasta	0.6312	0.298159		979533.3.fasta	0.4268	0.122196		551790.2.fasta	0.6174	0.0481524
386793.2.fasta	0.609	0.0461132		6666666.3738.fasta	0.6657	0.0220224		64186.1.fasta	0.3757	0.0434183
559189.2.fasta	0.2933	0.0653763		753084.3.fasta	0.5447	0.183263		329254.2.fasta	0.5107	0.00772514
320122.2.fasta	0.2877	0.134998		12417.1.fasta	0.3557	0.10497		120574.1.fasta	0.3841	0.184863
546805.2.fasta	0.6544	0.056457		230158.1.fasta	0.4246	0.0857652		197310.2.fasta	0.3532	0.0499023
10726.1.fasta	0.3927	0.0151256		172667.1.fasta	0.4457	0.0998218		12353.1.fasta	0.3766	0.0861754
55884.1.fasta	0.5077	0.0648159		343516.2.fasta	0.4897	0.0545445		347966.2.fasta	0.3526	0.120806
546182.2.fasta	0.6113	0.132412		576789.2.fasta	0.4051	0.0459212		564886.2.fasta	0.5111	0.0570691
490103.2.fasta	0.4227	0.00964544		322855.3.fasta	0.5189	0.102031		190478.1.fasta	0.2838	0.0620802
198542.1.fasta	0.3808	0.0230857		1026955.3.fasta	0.3975	0.266983		197783.1.fasta	0.5742	0.163765
624134.2.fasta	0.5472	0.0140118		6666666.3813.fasta	0.6465	0.0242422		642111.2.fasta	0.4296	0.132045
379501.2.fasta	0.3563	0.139556		50948.1.fasta	0.4044	0.0311287		10855.1.fasta	0.3205	0.150066
169683.1.fasta	0.3683	0.0188802		318593.2.fasta	0.4826	0.065718		546803.2.fasta	0.6472	0.0306058
106284.1.fasta	0.3543	0.145233		51369.1.fasta	0.4489	0.0280975		399183.2.fasta	0.4356	0.0117724
407392.2.fasta	0.3259	0.167278		6666666.3765.fasta	0.5892	0.0206892		236750.1.fasta	0.3972	0.0279859
376758.2.fasta	0.5402	0.370656		6666666.3867.fasta	0.6179	0.0384326		665886.2.fasta	0.3515	0.0557007
467481.2.fasta	0.6393	0.0980103		64186.1.fasta	0.3757	0.0470968		31535.1.fasta	0.578	0.0523566
644524.2.fasta	0.662	0.0668103		329254.2.fasta	0.5107	0.103498		115987.1.fasta	0.4388	0.0582416
373403.2.fasta	0.6294	0.298159		10756.2.fasta	0.3999	0.111142		563121.2.fasta	0.5734	0.0191644
487152.2.fasta	0.3433	0.136281		197310.2.fasta	0.3532	0.0464343		148943.1.fasta	0.4249	0.0432892
561999.2.fasta	0.5961	0.0891661		12353.1.fasta	0.3766	0.0389416		459845.2.fasta	0.3979	0.0308459
490912.2.fasta	0.4792	0.13347		347966.2.fasta	0.3526	0.0784927		528321.2.fasta	0.5973	0.0365665
10682.2.fasta	0.4741	0.018951		564886.2.fasta	0.5111	0.0655161		215167.2.fasta	0.3346	0.0609558
555387.2.fasta	0.4112	0.0372269		190478.1.fasta	0.2838	0.127769		373410.2.fasta	0.5971	0.0196269
532074.2.fasta	0.4878	0.0145785		6666666.3789.fasta	0.6398	0.0169974		437329.2.fasta	0.5629	0.0562739
320839.3.fasta	0.3346	0.114473		268746.6.fasta	0.3551	0.0798141		359961.2.fasta	0.3526	0.0396877
557393.2.fasta	0.4381	0.0404267		549446.2.fasta	0.5562	0.125365		185959.1.fasta	0.2316	0.194021
424944.2.fasta	0.4985	0.0128528		6666666.3710.fasta	0.598	0.0145033		505291.2.fasta	0.6433	0.0505921
363555.2.fasta	0.369	0.10095		546803.2.fasta	0.6472	0.0355906		649688.2.fasta	0.6669	0.0906605
261726.2.fasta	0.5695	0.0700208		6666666.3736.fasta	0.6899	0.0386241		205869.1.fasta	0.6312	0.200547
549445.2.fasta	0.5547	0.0408977		341698.2.fasta	0.3811	0.0366517		386793.2.fasta	0.609	0.0479991
575610.2.fasta	0.3325	0.120345		10708.1.fasta	0.6434	0.0977428		559189.2.fasta	0.2933	0.0957606
489779.2.fasta	0.495	0.10323		6666666.3712.fasta	0.6344	0.0166817		320122.2.fasta	0.2877	0.10912
406340.2.fasta	0.6535	0.0767002		665886.2.fasta	0.3515	0.0634392		546805.2.fasta	0.6544	0.0239817
546808.2.fasta	0.6478	0.0558357		31535.1.fasta	0.578	0.0497029		10726.1.fasta	0.3927	0.0908877
129862.2.fasta	0.511	0.0260296		115987.1.fasta	0.4388	0.0256642		55884.1.fasta	0.5077	0.0542053
175950.1.fasta	0.5101	0.0270058		563121.2.fasta	0.5734	0.0103846		313629.2.fasta	0.4117	0.943876
320835.3.fasta	0.3408	0.134978		114777.1.fasta	0.6189	0.184932		490103.2.fasta	0.4227	0.00666195
10760.1.fasta	0.484	0.0264034		6666666.3749.fasta	0.6649	0.0348458		198542.1.fasta	0.3808	0.165785
646413.2.fasta	0.3803	0.216914		148943.1.fasta	0.4249	0.108946		373406.2.fasta	0.6911	0.0871391
53369.2.fasta	0.341	0.134978		459845.2.fasta	0.3979	0.0410964		624134.2.fasta	0.5472	0.0185354
329864.2.fasta	0.4699	0.130361		528321.2.fasta	0.5973	0.0103159		40523.2.fasta	0.3593	0.0323156
484896.2.fasta	0.6228	0.0463201		6666666.3715.fasta	0.6345	0.0169639		379501.2.fasta	0.3563	0.0539568
59506.3.fasta	0.3459	0.149225		215167.2.fasta	0.3346	0.0868256		106284.1.fasta	0.3543	0.0574293
40631.1.fasta	0.5117	0.0151797		373410.2.fasta	0.5971	0.00864194		407392.2.fasta	0.3259	0.101874
563123.2.fasta	0.6122	0.119046		437329.2.fasta	0.5629	0.079464		376758.2.fasta	0.5402	0.274961
10719.1.fasta	0.6362	0.076668		359961.2.fasta	0.3526	0.0784927		225726.1.fasta	0.3472	0.0993817
561997.2.fasta	0.5967	0.0891661		673832.2.fasta	0.3401	0.0948803		467481.2.fasta	0.6393	0.0622458
320844.3.fasta	0.3524	0.135911		268747.4.fasta	0.3674	0.0426623		373414.2.fasta	0.6896	0.12176
88870.1.fasta	0.6811	0.124801		505291.2.fasta	0.6433	0.110192		164037.1.fasta	0.6594	0.0929575
320843.3.fasta	0.3506	0.132331		649688.2.fasta	0.6669	0.0213462		644524.2.fasta	0.662	0.0481702
204086.1.fasta	0.2962	0.146631		444861.3.fasta	0.4062	0.0580537		373403.2.fasta	0.6294	0.0755831
431892.2.fasta	0.6462	0.113945		6666666.3809.fasta	0.6404	0.0167684		573591.2.fasta	0.6369	0.0774124
198538.1.fasta	0.378	0.12678		389469.2.fasta	0.6426	0.13595		487152.2.fasta	0.3433	0.0553402
373405.2.fasta	0.6288	0.123843		205869.1.fasta	0.6312	0.0182447		445683.3.fasta	0.4111	0.150851
273133.2.fasta	0.4933	0.0538168		655097.2.fasta	0.5322	0.0253481		306323.3.fasta	0.4015	0.115891
194949.1.fasta	0.499	0.121884		559189.2.fasta	0.2933	0.097604		292443.3.fasta	0.4438	0.0688717
10677.1.fasta	0.5205	0.0136683		6666666.3855.fasta	0.6079	0.023162		490912.2.fasta	0.4792	0.0061959
445516.2.fasta	0.3359	0.113915		320122.2.fasta	0.2877	0.0608235		10682.2.fasta	0.4741	0.00639695
446529.2.fasta	0.6831	0.268063		546805.2.fasta	0.6544	0.034141		555387.2.fasta	0.4112	0.0262703
128710.2.fasta	0.4037	0.0523628		10726.1.fasta	0.3927	0.0366812		213775.2.fasta	0.3494	0.0647013
373409.2.fasta	0.6651	0.360096		6666666.3879.fasta	0.5957	0.0115086		12336.2.fasta	0.2628	0.117818
31757.1.fasta	0.6226	0.111714		55884.1.fasta	0.5077	0.0146404		532074.2.fasta	0.4878	0.0335008
77775.1.fasta	0.3901	0.0817702		546182.2.fasta	0.6113	0.024573		320839.3.fasta	0.3346	0.241766
245685.2.fasta	0.4268	0.0130124		6666666.3747.fasta	0.6907	0.0446787		198539.1.fasta	0.3825	0.0817965
225588.1.fasta	0.6276	0.0631637		6666666.3776.fasta	0.6176	0.026214		458639.2.fasta	0.418	0.0238243
546807.2.fasta	0.6483	0.0537027		198542.1.fasta	0.3808	0.0649299		557393.2.fasta	0.4381	0.0105572
491003.2.fasta	0.399	0.0787787		373406.2.fasta	0.6911	0.0439268		520962.2.fasta	0.5965	0.089013
151528.1.fasta	0.5321	0.0530073		624134.2.fasta	0.5472	0.0237451		424944.2.fasta	0.4985	0.0790625
320849.3.fasta	0.3572	0.132575		40523.2.fasta	0.3593	0.0486297		134554.1.fasta	0.5774	0.0581869
187764.2.fasta	0.4525	0.0260878		261665.2.fasta	0.4835	0.0447533		363555.2.fasta	0.369	0.0216823
338473.2.fasta	0.495	0.0219484		379501.2.fasta	0.3563	0.0714324		261726.2.fasta	0.5695	0.0541232
532075.2.fasta	0.4994	0.0187664		169683.1.fasta	0.3683	0.0398137		72638.1.fasta	0.3827	0.115927
347325.2.fasta	0.5356	0.13414		106284.1.fasta	0.3543	0.0738604		494269.2.fasta	0.3472	0.0626418
151537.1.fasta	0.3568	0.0803241		407392.2.fasta	0.3259	0.0712889		151535.1.fasta	0.3519	0.104389
418443.2.fasta	0.4984	0.0252124		376758.2.fasta	0.5402	0.0628431		575610.2.fasta	0.3325	0.062568
103807.1.fasta	0.4935	0.0296155		225726.1.fasta	0.3472	0.0380325		489779.2.fasta	0.495	0.0104854
440250.2.fasta	0.4648	0.128517		697227.5.fasta	0.3959	0.0247032		406340.2.fasta	0.6535	0.23699
348058.2.fasta	0.4726	0.13555		373414.2.fasta	0.6896	0.0350814		200913.2.fasta	0.4709	0.0453482
10685.2.fasta	0.3996	0.27147		164037.1.fasta	0.6594	0.241602		546808.2.fasta	0.6478	0.0528564
10753.2.fasta	0.3732	0.0784778		373403.2.fasta	0.6294	0.0171842		658056.2.fasta	0.2527	0.174411
345922.2.fasta	0.3494	0.0735137		573591.2.fasta	0.6369	0.165105		175950.1.fasta	0.5101	0.0426083
347324.2.fasta	0.6208	0.217133		487152.2.fasta	0.3433	0.0857642		320835.3.fasta	0.3408	0.0533469
37554.1.fasta	0.4979	0.0158081		445683.3.fasta	0.4111	0.0389414		10760.1.fasta	0.484	0.475098
451705.2.fasta	0.4402	0.0811548		561999.2.fasta	0.5961	0.0106878		225979.1.fasta	0.3278	0.108123
36343.2.fasta	0.3599	0.175665		306323.3.fasta	0.4015	0.0604607		646413.2.fasta	0.3803	0.0472098
10710.1.fasta	0.4986	0.0282546		685506.5.fasta	0.6149	0.0243699		53369.2.fasta	0.341	0.0513971
279280.3.fasta	0.6519	0.0789904		10682.2.fasta	0.4741	0.045711		565140.2.fasta	0.378	0.0362987
475178.2.fasta	0.3369	0.0855201		555387.2.fasta	0.4112	0.143209		31532.1.fasta	0.3451	0.109044
173824.1.fasta	0.4537	0.068593		213775.2.fasta	0.3494	0.140491		484896.2.fasta	0.6228	0.035573
227940.1.fasta	0.5211	0.0109823		12336.2.fasta	0.2628	0.202504		59506.3.fasta	0.3459	0.105269
179237.1.fasta	0.6149	0.128848		139872.2.fasta	0.347	0.0556739		347328.2.fasta	0.6446	0.0420314
194699.1.fasta	0.6541	0.109744		320839.3.fasta	0.3346	0.0885717		445515.2.fasta	0.3362	0.0894445
504346.2.fasta	0.5626	0.0360341		198539.1.fasta	0.3825	0.0583576		40631.1.fasta	0.5117	0.0275687
12402.1.fasta	0.3964	0.0768723		988656.3.fasta	0.5816	0.0290621		260372.3.fasta	0.5056	0.0565394
205875.1.fasta	0.6538	0.318155		6666666.3777.fasta	0.6647	0.0418215		563123.2.fasta	0.6122	0.0469211
431894.2.fasta	0.6305	0.0791514		458639.2.fasta	0.418	0.0530943		12348.2.fasta	0.4782	0.0506382
330397.2.fasta	0.3621	0.158512		557393.2.fasta	0.4381	0.0232007		10719.1.fasta	0.6362	0.0620745
320842.3.fasta	0.3501	0.136281		424944.2.fasta	0.4985	0.062637		561997.2.fasta	0.5967	0.0200642
279530.3.fasta	0.5445	0.133546		205872.1.fasta	0.6538	0.0392349		320844.3.fasta	0.3524	0.0613865
264729.3.fasta	0.6286	0.0496897		238854.4.fasta	0.3782	0.0656122		235201.3.fasta	0.3935	0.099412
47049.2.fasta	0.4864	0.0245574		6666666.3840.fasta	0.6087	0.0136317		382359.2.fasta	0.4063	0.0118385
320837.3.fasta	0.3373	0.119659		363555.2.fasta	0.369	0.0577368		88870.1.fasta	0.6811	0.073569
340054.2.fasta	0.4291	0.150474		139870.2.fasta	0.3514	0.0513627		400567.2.fasta	0.518	0.0202542
496396.2.fasta	0.6218	0.044877		261726.2.fasta	0.5695	0.0347716		320843.3.fasta	0.3506	0.0588286
207597.1.fasta	0.5062	0.058299		549445.2.fasta	0.5547	0.21084		204086.1.fasta	0.2962	0.0938713
215158.1.fasta	0.5085	0.0437726		72638.1.fasta	0.3827	0.0424215		431892.2.fasta	0.6462	0.0906045
242527.1.fasta	0.6531	0.0673599		494269.2.fasta	0.3472	0.127233		372457.2.fasta	0.3921	0.0804528
540068.2.fasta	0.6326	0.215378		151535.1.fasta	0.3519	0.0502383		365048.2.fasta	0.4438	0.0784315
320845.3.fasta	0.3572	0.142125		6666666.3768.fasta	0.6749	0.0365877		198538.1.fasta	0.378	0.0932682
576790.2.fasta	0.3952	0.0117085		575610.2.fasta	0.3325	0.0865278		373405.2.fasta	0.6288	0.0258041
373413.2.fasta	0.6734	0.648274		682370.2.fasta	0.3939	0.0617986		273133.2.fasta	0.4933	0.0168243
10759.1.fasta	0.499	0.0250495		6666666.3754.fasta	0.6756	0.0373149		194949.1.fasta	0.499	0.429145
563769.2.fasta	0.5091	0.0183698		6666666.3785.fasta	0.665	0.0347881		10677.1.fasta	0.5205	0.0951201
582382.2.fasta	0.5558	0.0353849		6666666.3762.fasta	0.6844	0.0321475		445516.2.fasta	0.3359	0.0642123
10679.1.fasta	0.5017	0.0162542		263375.1.fasta	0.654	0.218358		127507.1.fasta	0.4516	0.100592
10747.1.fasta	0.3883	0.0492207		406340.2.fasta	0.6535	0.0548393		320836.3.fasta	0.3692	0.114929
546806.2.fasta	0.6474	0.0541867		347962.3.fasta	0.3522	0.0545058		128710.2.fasta	0.4037	0.0407554
376821.2.fasta	0.4158	0.0785117		200913.2.fasta	0.4709	0.0419704		99179.2.fasta	0.3863	0.0280651
373408.2.fasta	0.6153	0.113293		6666666.3861.fasta	0.5879	0.0248411		373409.2.fasta	0.6651	0.114388
293178.2.fasta	0.3951	0.0116564		6666666.3806.fasta	0.6135	0.025318		31757.1.fasta	0.6226	0.095661
503388.2.fasta	0.3366	0.092179		1002724.3.fasta	0.4541	0.038923		77775.1.fasta	0.3901	0.0971723
388452.2.fasta	0.3511	0.0482167		546808.2.fasta	0.6478	0.0339014		245685.2.fasta	0.4268	0.0102357
268748.3.fasta	0.3876	0.0262201		6666666.3802.fasta	0.6376	0.0163417		225588.1.fasta	0.6276	0.0552033
35238.1.fasta	0.2679	0.170332		129862.2.fasta	0.511	0.0369397		145579.1.fasta	0.461	0.307531
10704.2.fasta	0.5895	0.0483211		709484.3.fasta	0.3992	0.0252932		515982.2.fasta	0.6656	0.0893344
470314.2.fasta	0.519	0.0368357		175950.1.fasta	0.5101	0.0170151		546807.2.fasta	0.6483	0.0297917
204090.1.fasta	0.2932	0.147643		6666666.3857.fasta	0.6302	0.0263886		665887.2.fasta	0.3503	0.0560124
348137.2.fasta	0.6154	0.0340799		6666666.3864.fasta	0.6405	0.0164963		491003.2.fasta	0.399	0.0115016
658401.2.fasta	0.523	0.0403931		6666666.3845.fasta	0.6478	0.0242936		413066.2.fasta	0.4161	0.0227714
359962.2.fasta	0.3513	0.0692539		445685.3.fasta	0.3996	0.0489321		320849.3.fasta	0.3572	0.0520834
373411.2.fasta	0.5966	0.0821497		6666666.3721.fasta	0.6418	0.015755		187764.2.fasta	0.4525	0.0203379
75320.1.fasta	0.426	0.034625		260149.5.fasta	0.372	0.0463188		338473.2.fasta	0.495	0.0273767
462590.2.fasta	0.6426	0.0743973		225979.1.fasta	0.3278	0.0585601		532075.2.fasta	0.4994	0.0289048
355246.2.fasta	0.4428	0.0287608		646413.2.fasta	0.3803	0.16315		287412.2.fasta	0.3497	0.0539403
280701.3.fasta	0.6317	0.176474		53369.2.fasta	0.341	0.0871819		334856.3.fasta	0.6239	0.0809608
552525.2.fasta	0.3642	0.0586626		565140.2.fasta	0.378	0.0668656		347325.2.fasta	0.5356	0.0275087
387908.2.fasta	0.3459	0.138159		329864.2.fasta	0.4699	0.0413065		151537.1.fasta	0.3568	0.112725
563119.2.fasta	0.6177	0.112272		347328.2.fasta	0.6446	0.103565		307240.3.fasta	0.4007	0.0254421
45406.2.fasta	0.3534	0.013799		6666666.3847.fasta	0.6646	0.0354975		33771.1.fasta	0.5585	0.0290418
194948.1.fasta	0.4969	0.121884		445515.2.fasta	0.3362	0.039778		418443.2.fasta	0.4984	0.0707666
546184.2.fasta	0.6757	0.648274		6666666.3812.fasta	0.6364	0.017031		440250.2.fasta	0.4648	0.0261863
386792.2.fasta	0.6232	0.0355549		6666666.3725.fasta	0.6842	0.0412552		12024.2.fasta	0.492	0.259037
540067.2.fasta	0.6343	0.0711223		981330.3.fasta	0.6957	0.122823		318596.2.fasta	0.4818	0.227883
194966.1.fasta	0.4723	0.0280215		867696.3.fasta	0.4522	0.029563		347326.2.fasta	0.4489	0.0115311
369257.2.fasta	0.4719	0.0125962		6666666.3878.fasta	0.6365	0.014872		348058.2.fasta	0.4726	0.045098
387905.2.fasta	0.3416	0.133625		40631.1.fasta	0.5117	0.0326109		198541.1.fasta	0.3857	0.0739569
373404.2.fasta	0.6474	0.0541867		6666666.3787.fasta	0.6364	0.0172276		10685.2.fasta	0.3996	0.0229615
330396.2.fasta	0.351	0.103461		260372.3.fasta	0.5056	0.131245		120086.1.fasta	0.545	0.0426657
29252.1.fasta	0.5309	0.0268928		563123.2.fasta	0.6122	0.0212824		66797.1.fasta	0.3464	0.0864545
470865.2.fasta	0.2894	0.152694		12348.2.fasta	0.4782	0.0497728		10753.2.fasta	0.3732	0.0471593
417280.2.fasta	0.5589	0.0820853		6666666.3818.fasta	0.6645	0.0352391		345922.2.fasta	0.3494	0.123957
540065.2.fasta	0.6371	0.0711431		10719.1.fasta	0.6362	0.0302156		347324.2.fasta	0.6208	0.108333
581037.2.fasta	0.5559	0.0348202		561997.2.fasta	0.5967	0.00829665		451705.2.fasta	0.4402	0.0067098
97081.1.fasta	0.4991	0.121884		320844.3.fasta	0.3524	0.0706806		330398.2.fasta	0.4082	0.103783
532077.2.fasta	0.5325	0.0179185		12345.1.fasta	0.3465	0.101222		546183.2.fasta	0.6292	0.14784
546185.2.fasta	0.6284	0.29778		235201.3.fasta	0.3935	0.0772297		36343.2.fasta	0.3599	0.0445898
129861.2.fasta	0.511	0.0273797		910475.3.fasta	0.6228	0.149104		213769.2.fasta	0.3388	0.0492853
405947.2.fasta	0.3556	0.14389		762660.3.fasta	0.3637	0.0292883		279280.3.fasta	0.6519	0.0636394
320847.3.fasta	0.3553	0.14389		382359.2.fasta	0.4063	0.0419671		475178.2.fasta	0.3369	0.0332147
526118.2.fasta	0.4654	0.0116352		88870.1.fasta	0.6811	0.017318		173824.1.fasta	0.4537	0.0345415
326036.2.fasta	0.3428	0.15212		400567.2.fasta	0.518	0.0300439		10754.1.fasta	0.4708	0.0453482
255131.1.fasta	0.6068	0.0277742		6666666.3819.fasta	0.6079	0.0230564		227940.1.fasta	0.5211	0.0512001
10752.2.fasta	0.413	0.522113		320843.3.fasta	0.3506	0.0728602		504346.2.fasta	0.5626	0.0262355
28369.1.fasta	0.6353	0.102401		431892.2.fasta	0.6462	0.0578073		12402.1.fasta	0.3964	0.0986176
431891.2.fasta	0.6045	0.0206204		372457.2.fasta	0.3921	0.0532466		205875.1.fasta	0.6538	0.307936
374527.2.fasta	0.3599	0.0585731		6666666.3884.fasta	0.6638	0.041264		384360.2.fasta	0.6261	0.0694823
373412.2.fasta	0.6142	0.124061		6666666.3880.fasta	0.6187	0.0300388		387909.2.fasta	0.3299	0.0591996
347329.2.fasta	0.5494	0.0580317		365048.2.fasta	0.4438	0.030018		12390.1.fasta	0.3551	0.142543
260121.2.fasta	0.6325	0.0736964		396359.2.fasta	0.2813	0.101237		431894.2.fasta	0.6305	0.0346331
575608.2.fasta	0.3491	0.0778373		198538.1.fasta	0.378	0.0701193		537874.2.fasta	0.4051	0.0332292
499235.2.fasta	0.5898	0.114565		6666666.3764.fasta	0.6153	0.0158986		648017.2.fasta	0.3357	0.0690781
466051.2.fasta	0.5776	0.0518534		373405.2.fasta	0.6288	0.0129871		330397.2.fasta	0.3621	0.0366383
444474.2.fasta	0.3597	0.0585731		273133.2.fasta	0.4933	0.0403689		424716.2.fasta	0.4613	0.0110463
447909.2.fasta	0.4479	0.107076		10677.1.fasta	0.5205	0.0341014		320842.3.fasta	0.3501	0.0579436
540066.2.fasta	0.6357	0.0693875		445516.2.fasta	0.3359	0.0852914		279530.3.fasta	0.5445	0.0613332
180816.1.fasta	0.4939	0.135078		6666666.3739.fasta	0.6708	0.0342053		10879.1.fasta	0.5582	0.0935345
532076.2.fasta	0.4839	0.026515		6666666.3788.fasta	0.6157	0.0175893		578234.2.fasta	0.3704	0.0397279
557289.2.fasta	0.6287	0.109617		446529.2.fasta	0.6831	0.0802031		93224.1.fasta	0.2265	0.20463
438482.2.fasta	0.5497	0.039053		320836.3.fasta	0.3692	0.0558152		264729.3.fasta	0.6286	0.148989
294631.3.fasta	0.306	0.0706019		663557.2.fasta	0.6387	0.0757708		47049.2.fasta	0.4864	0.0265584
320840.3.fasta	0.3511	0.0921231		99179.2.fasta	0.3863	0.155768		320837.3.fasta	0.3373	0.0835527
374529.2.fasta	0.3583	0.0585731		871584.5.fasta	0.3126	0.0983367		445686.3.fasta	0.3912	0.640658
130478.1.fasta	0.3331	0.109104		910474.3.fasta	0.6323	0.0751353		340054.2.fasta	0.4291	0.0214303
321023.5.fasta	0.4391	0.0190273		1002725.3.fasta	0.3557	0.108224		496396.2.fasta	0.6218	0.0401503
151536.1.fasta	0.3532	0.0569048		373409.2.fasta	0.6651	0.0322532		207597.1.fasta	0.5062	0.102638
103216.1.fasta	0.5172	0.0149455		31757.1.fasta	0.6226	0.0134039		215158.1.fasta	0.5085	0.0443867
10693.2.fasta	0.3525	0.018406		77775.1.fasta	0.3901	0.0771462		242527.1.fasta	0.6531	0.0608056
476523.2.fasta	0.6233	0.0458693		6666666.3760.fasta	0.6117	0.0320058		561998.2.fasta	0.5955	0.0201328
10778.1.fasta	0.3766	0.0757466		245685.2.fasta	0.4268	0.0528261		196242.1.fasta	0.5061	0.0839193
318595.2.fasta	0.4832	0.159888		225588.1.fasta	0.6276	0.0407928		540068.2.fasta	0.6326	0.0246749
110457.1.fasta	0.5063	0.019671		515982.2.fasta	0.6656	0.0212442		320845.3.fasta	0.3572	0.0569782
393598.2.fasta	0.6174	0.0711984		546807.2.fasta	0.6483	0.0343206		576790.2.fasta	0.3952	0.0245026
538979.2.fasta	0.5564	0.0281931		665887.2.fasta	0.3503	0.0634392		632112.2.fasta	0.374	0.0380916
227470.1.fasta	0.4278	0.0127807		491003.2.fasta	0.399	0.0378139		373413.2.fasta	0.6734	0.0915591
337828.3.fasta	0.44	0.0262061		413066.2.fasta	0.4161	0.0814324		194802.1.fasta	0.4952	0.0808797
555603.2.fasta	0.6384	0.0863373		151528.1.fasta	0.5321	0.0650164		563769.2.fasta	0.5091	0.0159655
484895.2.fasta	0.5225	0.116222		979535.3.fasta	0.4286	0.0606775		551895.2.fasta	0.461	0.0131772
78541.1.fasta	0.3856	0.178339		320849.3.fasta	0.3572	0.068438		10679.1.fasta	0.5017	0.324543
40522.2.fasta	0.3668	0.107952		287412.2.fasta	0.3497	0.117495		546806.2.fasta	0.6474	0.0312843
12407.1.fasta	0.5283	0.0196757		6666666.3808.fasta	0.6342	0.0293251		641487.2.fasta	0.3438	0.0233067
387910.2.fasta	0.3474	0.134978		334856.3.fasta	0.6239	0.219386		376821.2.fasta	0.4158	0.0413495
335797.2.fasta	0.6068	0.0530096		347325.2.fasta	0.5356	0.142109		373408.2.fasta	0.6153	0.1074
384848.2.fasta	0.5092	0.0742921		151537.1.fasta	0.3568	0.0770357		293178.2.fasta	0.3951	0.0771394
532078.2.fasta	0.4727	0.0116636		103807.1.fasta	0.4935	0.0219899		503388.2.fasta	0.3366	0.0809458
496874.2.fasta	0.4549	0.025273		6666666.3772.fasta	0.6143	0.017283		198540.1.fasta	0.3803	0.0517101
627480.2.fasta	0.6287	0.0447118		6666666.3890.fasta	0.6133	0.0178291		388452.2.fasta	0.3511	0.0223314
230871.1.fasta	0.3463	0.0992687		440250.2.fasta	0.4648	0.0561201		10702.1.fasta	0.7114	0.118908
146269.2.fasta	0.4428	0.0438135		6666666.3871.fasta	0.6102	0.0187324		244310.1.fasta	0.6364	0.131696
374526.2.fasta	0.3573	0.0585731		318596.2.fasta	0.4818	0.0465328		505292.2.fasta	0.6451	0.0525428
493906.2.fasta	0.4889	0.020258		6666666.3774.fasta	0.6137	0.0247009		189836.1.fasta	0.6428	0.304953
627087.2.fasta	0.3672	0.30396		683735.2.fasta	0.4244	0.0347628		35238.1.fasta	0.2679	0.147439
227720.1.fasta	0.4832	0.0249378		348058.2.fasta	0.4726	0.0592474		10704.2.fasta	0.5895	0.0351865
10661.1.fasta	0.4217	0.0498813		198541.1.fasta	0.3857	0.0670068		470314.2.fasta	0.519	0.0290336
262071.2.fasta	0.2873	0.0906186		10685.2.fasta	0.3996	0.080212		204090.1.fasta	0.2932	0.0936293
10665.1.fasta	0.353	0.0151493		66797.1.fasta	0.3464	0.156868		384359.2.fasta	0.5992	0.0889581
529929.2.fasta	0.5086	0.0212791		879630.3.fasta	0.43	0.0298435		279383.3.fasta	0.6212	0.0188377
10742.1.fasta	0.4948	0.0151637		345922.2.fasta	0.3494	0.0784927		360398.2.fasta	0.3347	0.152297
320846.3.fasta	0.3537	0.135021		221029.1.fasta	0.4743	0.0323023		674082.2.fasta	0.5237	0.0482253
139871.2.fasta	0.364	0.0449246		37554.1.fasta	0.4979	0.032775		658401.2.fasta	0.523	0.0194122
320841.3.fasta	0.3599	0.0541916		451705.2.fasta	0.4402	0.0458412		359962.2.fasta	0.3513	0.42651
255431.1.fasta	0.5149	0.0349947		330398.2.fasta	0.4082	0.090522		10871.1.fasta	0.6149	0.0850667
10730.1.fasta	0.4937	0.121884		866889.3.fasta	0.4893	0.0610008		373411.2.fasta	0.5966	0.0487052
101570.3.fasta	0.4859	0.00888652		546183.2.fasta	0.6292	0.0153438		204270.1.fasta	0.623	0.0566269
194701.2.fasta	0.5249	0.0156574		36343.2.fasta	0.3599	0.0868524		320850.3.fasta	0.3596	0.0493532
576791.2.fasta	0.3889	0.060371		673839.2.fasta	0.3778	0.0829511		75320.1.fasta	0.426	0.0824414
332032.3.fasta	0.6482	0.113796		10710.1.fasta	0.4986	0.0460901		355246.2.fasta	0.4428	0.0554326
430796.2.fasta	0.3304	0.114473		213769.2.fasta	0.3388	0.112107		55510.3.fasta	0.3026	0.187008
320834.3.fasta	0.343	0.137039		329381.8.fasta	0.4352	0.0305721		480808.2.fasta	0.6727	0.350193
342564.2.fasta	0.421	0.0496808		6666666.3892.fasta	0.6387	0.0211251		43685.1.fasta	0.3546	0.304259
340435.2.fasta	0.4595	0.0327345		475178.2.fasta	0.3369	0.0658141		552525.2.fasta	0.3642	0.0358839
448384.2.fasta	0.405	0.018453		6666666.3709.fasta	0.6286	0.0266546		387908.2.fasta	0.3459	0.0587629
540064.2.fasta	0.6339	0.0701238		205880.1.fasta	0.5731	0.0190988		563119.2.fasta	0.6177	0.0546329
10678.1.fasta	0.4731	0.0168448		444860.3.fasta	0.4043	0.0555152		45406.2.fasta	0.3534	0.0337281
279303.3.fasta	0.7039	0.111982		6666666.3783.fasta	0.6652	0.0348861		194948.1.fasta	0.4969	0.133136
326037.2.fasta	0.349	0.146978		10754.1.fasta	0.4708	0.0419704		127508.1.fasta	0.4724	0.0466526
414970.2.fasta	0.4912	0.0195324		669008.3.fasta	0.4873	0.0352051		442493.2.fasta	0.3574	0.0538129
31754.1.fasta	0.3497	0.0825642		6666666.3741.fasta	0.6073	0.0243573		386792.2.fasta	0.6232	0.0927738
186152.1.fasta	0.3335	0.115428		227940.1.fasta	0.5211	0.0338127		194966.1.fasta	0.4723	0.0187244
31537.1.fasta	0.3631	0.16917		6666666.3810.fasta	0.6105	0.0274975		369257.2.fasta	0.4719	0.384876
157239.1.fasta	0.3994	0.0187788		6666666.3848.fasta	0.6388	0.0195287		10876.1.fasta	0.3329	0.17462
563122.2.fasta	0.6126	0.114616		136084.1.fasta	0.4616	0.218297		387905.2.fasta	0.3416	0.0576122
482058.2.fasta	0.5802	0.122383		194699.1.fasta	0.6541	0.0650236		373404.2.fasta	0.6474	0.0298033
112023.1.fasta	0.3873	0.0708256		504346.2.fasta	0.5626	0.107189		330396.2.fasta	0.351	0.0473188
330395.2.fasta	0.3604	0.450696		12402.1.fasta	0.3964	0.0881885		403905.2.fasta	0.3965	0.0370716
242861.1.fasta	0.6065	0.177964		354260.3.fasta	0.3537	0.16911		29252.1.fasta	0.5309	0.0714742
				205875.1.fasta	0.6538	0.0164109		326574.3.fasta	0.6838	0.0866055
		0.0890453		387909.2.fasta	0.3299	0.0593414		560178.2.fasta	0.3926	0.0339603
		0.0873148		6666666.3708.fasta	0.6662	0.0286889		470865.2.fasta	0.2894	0.0749074
				12390.1.fasta	0.3551	0.0606653		417280.2.fasta	0.5589	0.0109333
				431894.2.fasta	0.6305	0.023538		540065.2.fasta	0.6371	0.14715
				537874.2.fasta	0.4051	0.0762189		581037.2.fasta	0.5559	0.0110576
				648017.2.fasta	0.3357	0.0478138		97081.1.fasta	0.4991	0.180481
				330397.2.fasta	0.3621	0.0974089		532077.2.fasta	0.5325	0.028908
				424716.2.fasta	0.4613	0.119156		370623.2.fasta	0.7119	0.136184
				6666666.3784.fasta	0.6679	0.0364429		129861.2.fasta	0.511	0.0112009
				6666666.3755.fasta	0.6155	0.0166463		405947.2.fasta	0.3556	0.0694478
				760939.3.fasta	0.4003	0.0209058		320847.3.fasta	0.3553	0.116451
				320842.3.fasta	0.3501	0.0685068		526118.2.fasta	0.4654	0.0275838
				279530.3.fasta	0.5445	0.0710238		326036.2.fasta	0.3428	0.056719
				578234.2.fasta	0.3704	0.0717932		255131.1.fasta	0.6068	0.184823
				910473.3.fasta	0.6371	0.133136		10752.2.fasta	0.413	0.0061048
				6666666.3731.fasta	0.6639	0.0272394		173707.1.fasta	0.3857	0.268028
				264729.3.fasta	0.6286	0.0272677		431891.2.fasta	0.6045	0.0369072
				6666666.3782.fasta	0.6124	0.0402911		563124.2.fasta	0.665	0.0746365
				6666666.3790.fasta	0.5878	0.0174848		373412.2.fasta	0.6142	0.078652
				6666666.3779.fasta	0.6296	0.0263886		347329.2.fasta	0.5494	0.0509426
				320837.3.fasta	0.3373	0.0883437		260121.2.fasta	0.6325	0.0381311
				445686.3.fasta	0.3912	0.058843		90410.1.fasta	0.3907	0.0550444
				340054.2.fasta	0.4291	0.0960159		575608.2.fasta	0.3491	0.0535739
				6666666.3766.fasta	0.6646	0.0357666		373407.2.fasta	0.6672	0.0632415
				6666666.3763.fasta	0.6301	0.0262255		499235.2.fasta	0.5898	0.0478153
				207597.1.fasta	0.5062	0.0263751		466051.2.fasta	0.5776	0.0355975
				6666666.3844.fasta	0.665	0.0398129		644007.2.fasta	0.3949	0.0464118
				6666666.3719.fasta	0.6365	0.015746		259901.1.fasta	0.3353	0.0935398
				561998.2.fasta	0.5955	0.00864733		46014.1.fasta	0.3196	0.060821
				67571.2.fasta	0.4389	0.08408		280702.3.fasta	0.251	0.151449
				540068.2.fasta	0.6326	0.0164378		225725.1.fasta	0.3769	0.175306
				320845.3.fasta	0.3572	0.0719323		444474.2.fasta	0.3597	0.0460924
				6666666.3816.fasta	0.6639	0.040457		447909.2.fasta	0.4479	0.035724
				373126.3.fasta	0.5083	0.0426796		180816.1.fasta	0.4939	0.137575
				576790.2.fasta	0.3952	0.0330925		532076.2.fasta	0.4839	0.0461985
				632112.2.fasta	0.374	0.0762676		557289.2.fasta	0.6287	0.0477309
				373413.2.fasta	0.6734	0.0346995		105154.1.fasta	0.4094	0.731295
				445700.3.fasta	0.3785	0.117049		298338.3.fasta	0.3732	0.164587
				591487.2.fasta	0.6748	0.0354047		438482.2.fasta	0.5497	0.0246797
				563769.2.fasta	0.5091	0.0553021		161736.1.fasta	0.5521	0.0424875
				582382.2.fasta	0.5558	0.203061		320840.3.fasta	0.3511	0.065668
				6666666.3798.fasta	0.6384	0.0159372		374529.2.fasta	0.3583	0.405969
				10679.1.fasta	0.5017	0.0270513		130478.1.fasta	0.3331	0.0644678
				546806.2.fasta	0.6474	0.0340959		469660.2.fasta	0.4089	0.0409349
				641487.2.fasta	0.3438	0.0815277		151599.3.fasta	0.6316	0.158232
				10658.1.fasta	0.4809	0.0683805		321023.5.fasta	0.4391	0.0669062
				6666666.3883.fasta	0.6296	0.0261855		293644.3.fasta	0.5008	0.0520093
				376821.2.fasta	0.4158	0.0420047		151536.1.fasta	0.3532	0.138251
				373408.2.fasta	0.6153	0.0225401		103216.1.fasta	0.5172	0.0153374
				293178.2.fasta	0.3951	0.0271435		10693.2.fasta	0.3525	0.0436063
				707757.5.fasta	0.4183	0.0336166		476523.2.fasta	0.6233	0.0420538
				503388.2.fasta	0.3366	0.212444		561996.2.fasta	0.6677	0.0635939
				198540.1.fasta	0.3803	0.0713263		10778.1.fasta	0.3766	0.218838
				388452.2.fasta	0.3511	0.0942188		10868.1.fasta	0.4371	0.0588246
				6666666.3730.fasta	0.6468	0.0255113		318595.2.fasta	0.4832	0.231993
				10702.1.fasta	0.7114	0.077844		543152.2.fasta	0.6834	0.0830128
				6666666.3839.fasta	0.6453	0.0155271		10690.1.fasta	0.4001	0.0403737
				244310.1.fasta	0.6364	0.0573298		35241.1.fasta	0.3622	0.0518795
				505292.2.fasta	0.6451	0.160583		541865.2.fasta	0.3042	0.0865816
				6666666.3804.fasta	0.6297	0.0271999		63118.1.fasta	0.3435	0.0642641
				10704.2.fasta	0.5895	0.066186		331627.2.fasta	0.6088	0.0669828
				470314.2.fasta	0.519	0.057823		393598.2.fasta	0.6174	0.0664662
				655098.2.fasta	0.5502	0.0656665		52979.1.fasta	0.4306	0.0816021
				6666666.3815.fasta	0.5968	0.0117888		538979.2.fasta	0.5564	0.0295791
				348137.2.fasta	0.6154	0.0848098		227470.1.fasta	0.4278	0.384975
				872294.5.fasta	0.3402	0.0695151		337828.3.fasta	0.44	0.0634787
				6666666.3757.fasta	0.6381	0.0171846		484895.2.fasta	0.5225	0.00747374
				279383.3.fasta	0.6212	0.18779		78541.1.fasta	0.3856	0.035284
				360398.2.fasta	0.3347	0.040168		40522.2.fasta	0.3668	0.0456832
				674082.2.fasta	0.5237	0.0278315		12407.1.fasta	0.5283	0.0994249
				6666666.3793.fasta	0.6652	0.035018		387910.2.fasta	0.3474	0.0535841
				658401.2.fasta	0.523	0.0944651		55511.2.fasta	0.3425	0.0989856
				6666666.3841.fasta	0.6428	0.0193502		543153.2.fasta	0.5629	0.0179386
				6666666.3794.fasta	0.6651	0.0345744		198543.1.fasta	0.3971	0.186935
				359962.2.fasta	0.3513	0.0784927		71366.1.fasta	0.3355	0.0574367
				6666666.3797.fasta	0.6363	0.0155616		335797.2.fasta	0.6068	0.0438533
				6666666.3720.fasta	0.6477	0.024003		397353.2.fasta	0.6419	0.048834
				373411.2.fasta	0.5966	0.0103007		384848.2.fasta	0.5092	0.00960891
				6666666.3885.fasta	0.6476	0.0237087		10680.1.fasta	0.4953	0.127135
				204270.1.fasta	0.623	0.0959736		532078.2.fasta	0.4727	0.231422
				320850.3.fasta	0.3596	0.0504886		496874.2.fasta	0.4549	0.0125183
				75320.1.fasta	0.426	0.0439124		627480.2.fasta	0.6287	0.0353081
				462590.2.fasta	0.6426	0.105053		230871.1.fasta	0.3463	0.171748
				6666666.3842.fasta	0.6113	0.0367785		146269.2.fasta	0.4428	0.0246167
				355246.2.fasta	0.4428	0.0359841		374526.2.fasta	0.3573	0.0552312
				55510.3.fasta	0.3026	0.0617127		279281.3.fasta	0.4459	0.0853812
				6666666.3888.fasta	0.6473	0.0247043		247080.1.fasta	0.569	0.128864
				480808.2.fasta	0.6727	0.0358483		493906.2.fasta	0.4889	0.0223575
				6666666.3740.fasta	0.6369	0.021517		83129.2.fasta	0.3468	0.0657215
				43685.1.fasta	0.3546	0.0570811		627087.2.fasta	0.3672	0.0360748
				552525.2.fasta	0.3642	0.0595759		227720.1.fasta	0.4832	0.407035
				387908.2.fasta	0.3459	0.0876078		373415.2.fasta	0.5685	0.0381451
				563119.2.fasta	0.6177	0.0234152		673375.2.fasta	0.5458	0.125003
				45406.2.fasta	0.3534	0.0305915		262071.2.fasta	0.2873	0.0856685
				213236.1.fasta	0.665	0.0425284		10665.1.fasta	0.353	0.113339
				546184.2.fasta	0.6757	0.0355239		173443.1.fasta	0.4752	0.246011
				442493.2.fasta	0.3574	0.0448327		529929.2.fasta	0.5086	0.169184
				6666666.3862.fasta	0.6385	0.0175656		10742.1.fasta	0.4948	0.0327347
				540067.2.fasta	0.6343	0.0141649		320846.3.fasta	0.3537	0.05929
				6666666.3830.fasta	0.673	0.023047		186153.1.fasta	0.3347	0.0797757
				387905.2.fasta	0.3416	0.0898428		10854.1.fasta	0.2289	0.203109
				673837.2.fasta	0.3455	0.0516386		10761.1.fasta	0.4747	0.0583315
				373404.2.fasta	0.6474	0.0343434		157924.1.fasta	0.3915	0.0473118
				330396.2.fasta	0.351	0.106026		139871.2.fasta	0.364	0.0254872
				403905.2.fasta	0.3965	0.11168		320841.3.fasta	0.3599	0.083088
				6666666.3827.fasta	0.6646	0.0396824		255431.1.fasta	0.5149	0.0312156
				29252.1.fasta	0.5309	0.0242242		35345.1.fasta	0.3538	0.0515265
				560178.2.fasta	0.3926	0.129486		101570.3.fasta	0.4859	0.0933748
				417280.2.fasta	0.5589	0.222476		194701.2.fasta	0.5249	0.0275699
				6666666.3737.fasta	0.6753	0.0358844		330399.2.fasta	0.355	0.0442695
				540065.2.fasta	0.6371	0.0144415		644563.2.fasta	0.428	0.186044
				581037.2.fasta	0.5559	0.250192		576791.2.fasta	0.3889	0.0211645
				370623.2.fasta	0.7119	0.1139		374525.2.fasta	0.3571	0.0587413
				546185.2.fasta	0.6284	0.0154233		332032.3.fasta	0.6482	0.519931
				6666666.3781.fasta	0.6656	0.0220224		430796.2.fasta	0.3304	0.143757
				315953.2.fasta	0.4123	0.297171		320834.3.fasta	0.343	0.0556406
				129861.2.fasta	0.511	0.0431797		342564.2.fasta	0.421	0.0819364
				405947.2.fasta	0.3556	0.0684894		340435.2.fasta	0.4595	0.0376205
				320847.3.fasta	0.3553	0.0842869		448384.2.fasta	0.405	0.0839492
				6666666.3870.fasta	0.6649	0.0343352		446807.2.fasta	0.6364	0.0679706
				300186.2.fasta	0.3566	0.130526		151538.1.fasta	0.3588	0.0405981
				326036.2.fasta	0.3428	0.0899021		10678.1.fasta	0.4731	0.051851
				255131.1.fasta	0.6068	0.0717179		70203.1.fasta	0.4342	0.224441
				10752.2.fasta	0.413	0.0371289		326037.2.fasta	0.349	0.057077
				6666666.3851.fasta	0.6856	0.0425438		414970.2.fasta	0.4912	0.0544058
				173707.1.fasta	0.3857	0.0675562		31754.1.fasta	0.3497	0.167298
				444862.3.fasta	0.3764	0.0558548		490913.2.fasta	0.4704	0.00807305
				28369.1.fasta	0.6353	0.0177981		186152.1.fasta	0.3335	0.0759028
				431891.2.fasta	0.6045	0.0741284		31537.1.fasta	0.3631	0.0769225
				6666666.3854.fasta	0.6646	0.0377177		157239.1.fasta	0.3994	0.046659
				563124.2.fasta	0.665	0.0321365		563122.2.fasta	0.6126	0.0499256
				374527.2.fasta	0.3599	0.0526543		423476.2.fasta	0.3748	0.0419199
				373412.2.fasta	0.6142	0.0225843		513550.2.fasta	0.3865	0.0306619
				260121.2.fasta	0.6325	0.0129642		155148.1.fasta	0.4669	0.0485766
				6666666.3911.fasta	0.6467	0.0352945		482058.2.fasta	0.5802	0.0176398
				743813.3.fasta	0.4949	0.0560848		112023.1.fasta	0.3873	0.0620287
				90410.1.fasta	0.3907	0.0482519		399185.2.fasta	0.3491	0.0574383
				6666666.3846.fasta	0.56	0.00862192		330395.2.fasta	0.3604	0.0273768
				575608.2.fasta	0.3491	0.0864842
				6666666.3758.fasta	0.6599	0.0432453				0.0917599
				373407.2.fasta	0.6672	0.021775				0.104266
				499235.2.fasta	0.5898	0.0572892
				466051.2.fasta	0.5776	0.139225
				644007.2.fasta	0.3949	0.0675395
				259901.1.fasta	0.3353	0.0580816
				225725.1.fasta	0.3769	0.134018
				444859.3.fasta	0.4114	0.0497698
				382685.2.fasta	0.371	0.0638183
				444474.2.fasta	0.3597	0.0831603
				447909.2.fasta	0.4479	0.0520186
				6666666.3728.fasta	0.5996	0.0149758
				540066.2.fasta	0.6357	0.014057
				6666666.3821.fasta	0.6633	0.0349464
				557289.2.fasta	0.6287	0.0260433
				6666666.3823.fasta	0.6258	0.0121622
				298338.3.fasta	0.3732	0.0823425
				294631.3.fasta	0.306	0.0517257
				6666666.3713.fasta	0.6136	0.0184135
				320840.3.fasta	0.3511	0.0770095
				374529.2.fasta	0.3583	0.0831603
				130478.1.fasta	0.3331	0.0833424
				469660.2.fasta	0.4089	0.200189
				673835.2.fasta	0.3461	0.0922667
				151599.3.fasta	0.6316	0.145273
				321023.5.fasta	0.4391	0.0222385
				293644.3.fasta	0.5008	0.0137551
				151536.1.fasta	0.3532	0.0724993
				205874.1.fasta	0.6896	0.0364714
				103216.1.fasta	0.5172	0.0315363
				6666666.3761.fasta	0.6468	0.0307144
				10693.2.fasta	0.3525	0.0480548
				760732.3.fasta	0.3901	0.0185955
				561996.2.fasta	0.6677	0.0199591
				205876.1.fasta	0.609	0.0181075
				663241.2.fasta	0.3439	0.0523156
				6666666.3863.fasta	0.6648	0.0359106
				318595.2.fasta	0.4832	0.0624253
				445688.3.fasta	0.3709	0.0651539
				543152.2.fasta	0.6834	0.0465695
				318594.2.fasta	0.4823	0.0436009
				633135.2.fasta	0.3899	0.0437751
				10690.1.fasta	0.4001	0.0428665
				35241.1.fasta	0.3622	0.0703849
				541865.2.fasta	0.3042	0.0786489
				63118.1.fasta	0.3435	0.0726535
				393598.2.fasta	0.6174	0.0441966
				52979.1.fasta	0.4306	0.100055
				538979.2.fasta	0.5564	0.125709
				6666666.3853.fasta	0.6376	0.0157346
				227470.1.fasta	0.4278	0.0294227
				337828.3.fasta	0.44	0.0339723
				555603.2.fasta	0.6384	0.0147761
				78541.1.fasta	0.3856	0.12079
				40522.2.fasta	0.3668	0.116145
				12407.1.fasta	0.5283	0.0295434
				387910.2.fasta	0.3474	0.0728602
				445684.3.fasta	0.4125	0.0440178
				55511.2.fasta	0.3425	0.0688149
				543153.2.fasta	0.5629	0.00853449
				198543.1.fasta	0.3971	0.141063
				71366.1.fasta	0.3355	0.0482949
				335797.2.fasta	0.6068	0.0449077
				397353.2.fasta	0.6419	0.158033
				384848.2.fasta	0.5092	0.0288045
				6666666.3791.fasta	0.6748	0.0398167
				496874.2.fasta	0.4549	0.0498431
				146269.2.fasta	0.4428	0.0702044
				374526.2.fasta	0.3573	0.0831603
				416419.2.fasta	0.6489	0.222663
				279281.3.fasta	0.4459	0.0494999
				6666666.3770.fasta	0.6465	0.0242281
				493906.2.fasta	0.4889	0.0424356
				83129.2.fasta	0.3468	0.0717354
				6666666.3849.fasta	0.6292	0.0267546
				627087.2.fasta	0.3672	0.0480206
				373415.2.fasta	0.5685	0.0192796
				673375.2.fasta	0.5458	0.0122031
				262071.2.fasta	0.2873	0.0836341
				10665.1.fasta	0.353	0.0378737
				173443.1.fasta	0.4752	0.0426008
				10742.1.fasta	0.4948	0.0318762
				6666666.3734.fasta	0.6891	0.0352599
				320846.3.fasta	0.3537	0.0693842
				186153.1.fasta	0.3347	0.0476809
				6666666.3805.fasta	0.6484	0.0248913
				10761.1.fasta	0.4747	0.0860722
				879628.3.fasta	0.413	0.0292551
				864178.3.fasta	0.2838	0.157239
				157924.1.fasta	0.3915	0.112666
				139871.2.fasta	0.364	0.0998423
				320841.3.fasta	0.3599	0.0777046
				255431.1.fasta	0.5149	0.0306368
				35345.1.fasta	0.3538	0.0624363
				101570.3.fasta	0.4859	0.0494509
				194701.2.fasta	0.5249	0.0417499
				330399.2.fasta	0.355	0.0723271
				644563.2.fasta	0.428	0.0296919
				576791.2.fasta	0.3889	0.0790132
				374525.2.fasta	0.3571	0.0747207
				332032.3.fasta	0.6482	0.0647913
				6666666.3852.fasta	0.6656	0.0351712
				430796.2.fasta	0.3304	0.0902203
				342564.2.fasta	0.421	0.0473008
				340435.2.fasta	0.4595	0.0437252
				344021.6.fasta	0.4978	0.0397603
				448384.2.fasta	0.405	0.0480196
				6666666.3893.fasta	0.6188	0.0341722
				6666666.3780.fasta	0.6645	0.0400541
				540064.2.fasta	0.6339	0.0140382
				645664.3.fasta	0.4044	0.0294905
				10678.1.fasta	0.4731	0.032273
				700939.3.fasta	0.4033	0.0266196
				279303.3.fasta	0.7039	0.124287
				6666666.4038.fasta	0.6183	0.0301975
				326037.2.fasta	0.349	0.0774387
				414970.2.fasta	0.4912	0.0516225
				31754.1.fasta	0.3497	0.0907154
				6666666.3872.fasta	0.6888	0.0425232
				176106.2.fasta	0.3335	0.182402
				186152.1.fasta	0.3335	0.0883437
				31537.1.fasta	0.3631	0.1034
				157239.1.fasta	0.3994	0.187477
				563122.2.fasta	0.6126	0.0219091
				504553.3.fasta	0.5397	0.296016
				279006.3.fasta	0.3967	0.0745427
				423476.2.fasta	0.3748	0.0654946
				155148.1.fasta	0.4669	0.139721
				6666666.3869.fasta	0.6744	0.0369123
				482058.2.fasta	0.5802	0.0736828
				112023.1.fasta	0.3873	0.0585549
				399185.2.fasta	0.3491	0.0734225
				693582.2.fasta	0.5891	0.0379687
				330395.2.fasta	0.3604	0.0550905
				242861.1.fasta	0.6065	0.0834154
				637730.2.fasta	0.504	0.0269097
				310539.3.fasta	0.4396	0.0842727
						0.0602602
					Std Dev	0.0475722

## Sheet: Sheet3
Amino Acids	455649.2.fasta	280702.3.fasta	157898.2.fasta	658056.2.fasta	934027.3.fasta	10876.1.fasta	avg_phage_kld	189836.1.fasta	668994.3.fasta	10702.1.fasta
GC%	0.222109	0.25104	0.252693	0.252721	0.261535	0.332888		0.642833	0.679502	0.711377
A	0.0275189	0.0430611	0.041633	0.0295351	0.0331004	0.0441379	0.0861176	0.113736	0.111971	0.136344
C	0.00577008	0.00655277	0.00784223	0.0110518	0.0185008	0.00827586	0.00976479	0.0236264	0.00755287	0.010409
D	0.0461607	0.0477416	0.0453235	0.0590701	0.0633048	0.0262069	0.063488	0.0494505	0.0396526	0.0647266
E	0.0443853	0.0774631	0.0680429	0.0602134	0.0684266	0.0303448	0.0660732	0.0296703	0.0549471	0.0557836
F	0.0954283	0.0613152	0.0580095	0.0466845	0.0499976	0.0510345	0.0368912	0.0197802	0.0260574	0.0206715
G	0.0417221	0.0351041	0.0403644	0.0436357	0.0499976	0.0413793	0.0739948	0.134066	0.0972432	0.0871573
H	0.00887705	0.0112333	0.0108407	0.00933689	0.0156766	0.0289655	0.0186633	0.0142857	0.0117069	0.0211113
I	0.100311	0.0858881	0.110368	0.0987043	0.0925758	0.113103	0.0578388	0.0417582	0.0343656	0.0354054
K	0.106081	0.118652	0.0861492	0.0825076	0.102149	0.0882759	0.0593942	0.0186813	0.0322885	0.0240434
L	0.0980914	0.102972	0.0981432	0.0823171	0.0874539	0.0965517	0.0800006	0.0945055	0.105929	0.0843718
M	0.0199734	0.0161479	0.0198362	0.0188643	0.0210617	0.0262069	0.0248881	0.0241758	0.0194486	0.0181792
N	0.0905459	0.0947812	0.0748472	0.106136	0.0858504	0.0634483	0.0466042	0.0153846	0.0202039	0.0156135
P	0.0199734	0.0262111	0.0319456	0.0289634	0.0258963	0.017931	0.0430821	0.0456044	0.0793051	0.0740361
Q	0.0341767	0.0397847	0.0456695	0.035061	0.0268058	0.0675862	0.0373234	0.0340659	0.0438066	0.029761
R	0.027075	0.0219986	0.0298697	0.0289634	0.0265425	0.0344828	0.0542351	0.0840659	0.0827039	0.0923618
S	0.0545939	0.0629534	0.0618152	0.081936	0.0688335	0.0675862	0.0607076	0.0763736	0.0489048	0.050799
T	0.0443853	0.0449333	0.048322	0.0554497	0.0517687	0.0689655	0.0620421	0.0423077	0.048716	0.0631872
V	0.0532623	0.0432951	0.0521278	0.0491616	0.0508353	0.0413793	0.0681159	0.0978022	0.0857251	0.075722
W	0.0221926	0.0154458	0.00807289	0.0110518	0.00844861	0.0137931	0.0154522	0.0346154	0.0188822	0.0214778
Y	0.0594763	0.0444652	0.0607773	0.0613567	0.0527739	0.0703448	0.0353164	0.00604396	0.0305891	0.0188389
U	0	0	0	0	0	0	0	0	0	0
X	0	0	0	0	0	0	6.35374e-06	0	0	0
B	0	0	0	0	0	0	7.05972e-08	0	0	0
Z	0	0	0	0	0	0	0	0	0	0
J	0	0	0	0	0	0	0	0	0	0
O	0	0	0	0	0	0	0	0	0	0

## Sheet: Sheet7
Subsystems	avg_phage_kld	std_phage_kld	455649.2.fasta	280702.3.fasta	157898.2.fasta	658056.2.fasta	934027.3.fasta	10876.1.fasta	189836.1.fasta	668994.3.fasta	10702.1.fasta
			0.222109	0.25104	0.252693	0.252721	0.261535	0.332888	0.642833	0.679502	0.711377
Not in a subsystem	0.0685735	0.0788404	0.237647
Phage_capsid_proteins	0.0609114	0.0569435
Phage_replication	0.0573759	0.0520886
Phage_experimental	0.0917599	0.104266
Phage_head_and_packaging	0.0685593	0.0599127
Phage_lysis_modules	0.0822102	0.0716827
Phage_tail	0.0602602	0.0475722
Phage_tail_fiber	0.0890453	0.0873148

## Sheet: class_kld
Class	Average_phage	STD_dev_phage	Total_phage	SEM_phage
Actinobacteria (71)	0.0367863	0.0295461	71	0.00350648
Alphaproteobacteria (7)	0.0228766	0.0198496	7	0.00750243
Bacilli	0.0387978	0.015563	164	0.00121527
Bacteroidia (1)	0.0315161	0	1	0
Betaproteobacteria (33)	0.0380593	0.0164539	33	0.00286425
Chlamydiae (6)	0.0443511	0.00797271	6	0.00325485
Clostridia (8)	0.100635	0.0259501	8	0.00917475
Deinococci (4)	0.06602	0.0294932	4	0.0147466
Deltaproteobacteria (2)	0.0753635	0.0172583	2	0.0122034
Flavobacteria (1)	0.0550133	0	1	0
Gammaproteobacteria (249)	0.0196097	0.0135536	249	0.000858925
Halobacteria (5)	0.0479414	0.0226396	5	0.0101247
Methanobacteria (2)	0.0292068	0.00122196	2	0.000864056
Mollicutes (9)	0.148446	0.0559333	9	0.0186444
Unclassified (8)	0.0144933	0.00504719	8	0.00178445
Class	Average_bact	STD_dev_bact	Total_bact	SEM_bact	Class	Average_phage	STD_dev_phage	Total_phage	SEM_phage
Actinobacteria	0.043402	0.029686	28	0.00561013	Actinobacteria (71)	0.0367863	0.0295461	71	0.00350648
Alphaproteobacteria	0.035832	0.027671	48	0.00399396	Alphaproteobacteria (7)	0.0228766	0.0198496	7	0.00750243
Aquificae	0.076753	0	1	0
Bacilli	0.034361	0.011252	76	0.00129069	Bacilli	0.0387978	0.015563	164	0.00121527
Bacteroidetes	0.024437	0.006135	6	0.0025046	Bacteroidia (1)	0.0315161	0	1	0
Betaproteobacteria	0.024137	0.017934	28	0.00338921	Betaproteobacteria (33)	0.0380593	0.0164539	33	0.00286425
Chlamydiae	0.02502	0.00211	10	0.000667241	Chlamydiae (6)	0.0443511	0.00797271	6	0.00325485
Chlorobia	0.004971	0.001052	2	0.000743876
Clostridia	0.076544	0.034443	9	0.011481	Clostridia (8)	0.100635	0.0259501	8	0.00917475
Cyanobacteria	0.03384	0.022176	11	0.00668632
Deinococci	0.074918	0.027138	4	0.013569	Deinococci (4)	0.06602	0.0294932	4	0.0147466
Deltaproteobacteria	0.011058	0.006563	9	0.00218767	Deltaproteobacteria (2)	0.0753635	0.0172583	2	0.0122034
Epsilonproteobacteria	0.078065	0.021836	16	0.005459
Flavobacteria	0.054279	0.002736	2	0.00193464	Flavobacteria (1)	0.0550133	0	1	0
Fusobacteria	0.116964	0	1	0
Gammaproteobacteria	0.018773	0.032538	99	0.00327019	Gammaproteobacteria (249)	0.0196097	0.0135536	249	0.000858925
Mollicutes	0.135452	0.029727	13	0.00824479	Mollicutes (9)	0.148446	0.0559333	9	0.0186444
Sphingobacteria	0.04308	0.000504	2	0.000356382
Spirochaetes	0.086893	0.054832	6	0.0223851
Thermotogae	0.050824	0	1	0
Halobacteria					Halobacteria (5)	0.0479414	0.0226396	5	0.0101247
Methanobacteria					Methanobacteria (2)	0.0292068	0.00122196	2	0.000864056
					Unclassified (8)	0.0144933	0.00504719	8	0.00178445

## Sheet: Sheet8
phage_id	GC%
1002724.3.fasta	0.454077
1002725.3.fasta	0.355674
101570.3.fasta	0.485928
1026955.3.fasta	0.397451
103216.1.fasta	0.517226
1032362.3.fasta	0.308299
103807.1.fasta	0.493506
105154.1.fasta	0.40938
106284.1.fasta	0.354309
10658.1.fasta	0.480871
10661.1.fasta	0.421669
10665.1.fasta	0.352978
10677.1.fasta	0.520549
10678.1.fasta	0.473112
10679.1.fasta	0.501682
10680.1.fasta	0.495268
10682.2.fasta	0.47411
10685.2.fasta	0.399647
10690.1.fasta	0.400062
10693.2.fasta	0.35253
10702.1.fasta	0.711377
10704.2.fasta	0.589517
10708.1.fasta	0.643402
10710.1.fasta	0.498577
10717.1.fasta	0.426904
10719.1.fasta	0.636186
10724.1.fasta	0.437044
10726.1.fasta	0.392698
10730.1.fasta	0.493676
10742.1.fasta	0.494834
10747.1.fasta	0.388306
10752.2.fasta	0.41304
10753.2.fasta	0.373167
10754.1.fasta	0.470808
10756.2.fasta	0.399907
10759.1.fasta	0.499005
10760.1.fasta	0.483987
10761.1.fasta	0.474682
10778.1.fasta	0.376597
10843.1.fasta	0.456876
10844.1.fasta	0.443372
10845.2.fasta	0.452084
10847.1.fasta	0.447642
10848.1.fasta	0.449171
10849.1.fasta	0.451782
10854.1.fasta	0.228938
10855.1.fasta	0.320516
10857.2.fasta	0.364978
10862.3.fasta	0.580733
10863.2.fasta	0.409396
10864.2.fasta	0.408864
10867.1.fasta	0.405492
10868.1.fasta	0.437071
10869.1.fasta	0.427195
10870.1.fasta	0.407523
10871.1.fasta	0.614914
10872.1.fasta	0.453626
10876.1.fasta	0.332888
10879.1.fasta	0.558162
110457.1.fasta	0.506313
112023.1.fasta	0.387272
114416.1.fasta	0.358362
114777.1.fasta	0.618876
115987.1.fasta	0.438807
117575.1.fasta	0.406222
120086.1.fasta	0.545048
12017.1.fasta	0.513846
12018.1.fasta	0.47865
12021.1.fasta	0.46529
12023.1.fasta	0.542085
12024.2.fasta	0.492024
120574.1.fasta	0.384118
12336.2.fasta	0.26284
12345.1.fasta	0.346538
12348.2.fasta	0.478173
12353.1.fasta	0.376558
12355.1.fasta	0.455525
12360.1.fasta	0.344968
12390.1.fasta	0.355091
12402.1.fasta	0.396413
12407.1.fasta	0.528267
12417.1.fasta	0.355715
127507.1.fasta	0.451617
127508.1.fasta	0.472355
127509.3.fasta	0.456623
127511.3.fasta	0.456748
128708.3.fasta	0.388535
128710.2.fasta	0.403685
128975.2.fasta	0.515554
129009.1.fasta	0.334758
129861.2.fasta	0.510981
129862.2.fasta	0.510951
130478.1.fasta	0.333147
134554.1.fasta	0.577351
136084.1.fasta	0.461602
139870.2.fasta	0.351406
139871.2.fasta	0.364008
139872.2.fasta	0.346967
141904.3.fasta	0.44623
145579.1.fasta	0.461036
146269.2.fasta	0.442796
148943.1.fasta	0.424939
151528.1.fasta	0.532086
151534.1.fasta	0.342385
151535.1.fasta	0.351877
151536.1.fasta	0.353229
151537.1.fasta	0.356789
151538.1.fasta	0.358762
151539.1.fasta	0.330391
151599.3.fasta	0.631598
154784.1.fasta	0.438613
155148.1.fasta	0.466877
157239.1.fasta	0.399359
157898.2.fasta	0.252693
157899.2.fasta	0.251989
157924.1.fasta	0.391502
161736.1.fasta	0.552114
164037.1.fasta	0.65944
169683.1.fasta	0.368332
172667.1.fasta	0.445737
173443.1.fasta	0.475233
173707.1.fasta	0.385707
173824.1.fasta	0.453747
175950.1.fasta	0.51015
176106.2.fasta	0.333521
179237.1.fasta	0.614863
180503.1.fasta	0.435031
180504.1.fasta	0.61192
180816.1.fasta	0.493888
181007.3.fasta	0.347254
181604.1.fasta	0.437228
185959.1.fasta	0.231591
186152.1.fasta	0.333467
186153.1.fasta	0.334722
187764.2.fasta	0.452473
188350.1.fasta	0.522273
189836.1.fasta	0.642833
190478.1.fasta	0.283821
194699.1.fasta	0.654084
194701.2.fasta	0.524886
194802.1.fasta	0.495197
194948.1.fasta	0.496943
194949.1.fasta	0.499011
194966.1.fasta	0.472275
196242.1.fasta	0.506076
197310.2.fasta	0.353245
197783.1.fasta	0.574159
198110.2.fasta	0.453444
198538.1.fasta	0.378016
198539.1.fasta	0.382548
198540.1.fasta	0.380255
198541.1.fasta	0.385731
198542.1.fasta	0.38083
198543.1.fasta	0.397136
200913.2.fasta	0.470904
204086.1.fasta	0.296235
204090.1.fasta	0.293246
204270.1.fasta	0.622969
205868.1.fasta	0.613038
205869.1.fasta	0.631152
205872.1.fasta	0.653777
205874.1.fasta	0.689567
205875.1.fasta	0.65384
205876.1.fasta	0.609016
205879.1.fasta	0.613746
205880.1.fasta	0.573132
207597.1.fasta	0.506181
209052.1.fasta	0.633311
213236.1.fasta	0.665024
213769.2.fasta	0.33884
213775.2.fasta	0.349434
215158.1.fasta	0.508482
215167.2.fasta	0.334633
221029.1.fasta	0.474306
222645.1.fasta	0.557933
223524.1.fasta	0.433705
225067.3.fasta	0.410408
225588.1.fasta	0.627621
225725.1.fasta	0.376887
225726.1.fasta	0.34724
225979.1.fasta	0.327776
227470.1.fasta	0.427789
227720.1.fasta	0.483158
227940.1.fasta	0.521056
230158.1.fasta	0.424558
230871.1.fasta	0.346258
232237.1.fasta	0.520384
233894.4.fasta	0.410398
235201.3.fasta	0.393549
235266.2.fasta	0.3694
236750.1.fasta	0.397188
238854.4.fasta	0.378205
242527.1.fasta	0.653063
242861.1.fasta	0.606541
244310.1.fasta	0.63639
244589.2.fasta	0.396961
244590.2.fasta	0.384969
245685.2.fasta	0.426797
247080.1.fasta	0.569004
248496.2.fasta	0.38746
254397.2.fasta	0.510533
255131.1.fasta	0.606835
255431.1.fasta	0.514854
256994.2.fasta	0.375341
259901.1.fasta	0.335331
260120.2.fasta	0.636991
260121.2.fasta	0.632459
260149.5.fasta	0.371957
260372.3.fasta	0.505583
260373.1.fasta	0.634384
260827.3.fasta	0.504851
261665.2.fasta	0.483536
261726.2.fasta	0.569521
262071.2.fasta	0.287258
263374.1.fasta	0.654384
263375.1.fasta	0.654018
264729.3.fasta	0.628606
268746.6.fasta	0.355058
268747.4.fasta	0.367435
268748.3.fasta	0.387569
270161.2.fasta	0.483996
270673.3.fasta	0.453646
273133.2.fasta	0.49327
279006.3.fasta	0.396725
279280.3.fasta	0.651939
279281.3.fasta	0.445922
279303.3.fasta	0.703878
279383.3.fasta	0.62122
279530.3.fasta	0.544526
280701.3.fasta	0.63172
280702.3.fasta	0.25104
28358.2.fasta	0.561591
28369.1.fasta	0.635298
285013.2.fasta	0.352153
287412.2.fasta	0.349666
292029.3.fasta	0.303882
292443.3.fasta	0.443788
29252.1.fasta	0.530858
292639.2.fasta	0.495295
293178.2.fasta	0.395126
293644.3.fasta	0.500809
294382.3.fasta	0.417405
294631.3.fasta	0.305979
298338.3.fasta	0.373208
300186.2.fasta	0.356561
306323.3.fasta	0.40151
307240.3.fasta	0.400701
309181.2.fasta	0.39128
310539.3.fasta	0.43963
310953.3.fasta	0.459387
313629.2.fasta	0.4117
31532.1.fasta	0.34512
31535.1.fasta	0.578042
31537.1.fasta	0.363071
315953.2.fasta	0.412259
31754.1.fasta	0.349749
31757.1.fasta	0.622579
318593.2.fasta	0.482558
318594.2.fasta	0.482292
318595.2.fasta	0.483215
318596.2.fasta	0.481826
320122.2.fasta	0.287726
320831.3.fasta	0.31417
320832.3.fasta	0.292873
320834.3.fasta	0.343022
320835.3.fasta	0.34077
320836.3.fasta	0.369161
320837.3.fasta	0.337302
320839.3.fasta	0.334591
320840.3.fasta	0.351137
320841.3.fasta	0.359913
320842.3.fasta	0.350078
320843.3.fasta	0.350597
320844.3.fasta	0.352391
320845.3.fasta	0.357238
320846.3.fasta	0.353745
320847.3.fasta	0.355337
320848.3.fasta	0.354699
320849.3.fasta	0.357215
320850.3.fasta	0.359576
321023.5.fasta	0.439134
322855.3.fasta	0.518881
326036.2.fasta	0.342794
326037.2.fasta	0.34899
326574.3.fasta	0.683836
329254.2.fasta	0.510746
329381.8.fasta	0.435211
329852.2.fasta	0.521154
329855.2.fasta	0.502572
329864.2.fasta	0.469851
329886.3.fasta	0.42612
330395.2.fasta	0.360394
330396.2.fasta	0.350995
330397.2.fasta	0.362119
330398.2.fasta	0.408185
330399.2.fasta	0.354973
331627.2.fasta	0.608816
332032.3.fasta	0.648184
334856.3.fasta	0.62386
335797.2.fasta	0.606803
33771.1.fasta	0.558465
337828.3.fasta	0.440007
338101.2.fasta	0.452703
338102.2.fasta	0.450338
338103.2.fasta	0.447259
338105.2.fasta	0.449407
338106.2.fasta	0.44831
338107.2.fasta	0.449347
338108.2.fasta	0.458649
338109.2.fasta	0.450877
338110.2.fasta	0.443521
338111.2.fasta	0.444857
338112.2.fasta	0.443557
338113.2.fasta	0.447271
338114.2.fasta	0.444671
338115.2.fasta	0.448385
338116.2.fasta	0.444857
338117.2.fasta	0.448756
338118.2.fasta	0.450798
338119.2.fasta	0.444486
338120.2.fasta	0.445043
338121.2.fasta	0.445785
338122.2.fasta	0.443929
338123.2.fasta	0.443743
338124.2.fasta	0.445414
338125.2.fasta	0.447271
338126.2.fasta	0.445517
338127.2.fasta	0.46083
338128.2.fasta	0.460289
338129.2.fasta	0.462996
338130.2.fasta	0.459566
338131.2.fasta	0.462794
338132.2.fasta	0.460821
338133.2.fasta	0.458132
338134.2.fasta	0.457952
338135.2.fasta	0.464641
338136.2.fasta	0.463194
338137.2.fasta	0.461385
338138.2.fasta	0.457949
338140.2.fasta	0.450784
338473.2.fasta	0.495021
340054.2.fasta	0.429102
340435.2.fasta	0.45953
341698.2.fasta	0.381097
342564.2.fasta	0.421046
343516.2.fasta	0.48972
344021.6.fasta	0.497758
344022.2.fasta	0.450531
345922.2.fasta	0.34945
346881.2.fasta	0.368538
346882.2.fasta	0.368699
346883.2.fasta	0.379726
346884.2.fasta	0.36803
347324.2.fasta	0.620832
347325.2.fasta	0.535594
347326.2.fasta	0.448933
347327.2.fasta	0.447833
347328.2.fasta	0.644635
347329.2.fasta	0.549436
347962.3.fasta	0.352213
347966.2.fasta	0.352642
348058.2.fasta	0.472638
348137.2.fasta	0.615391
35238.1.fasta	0.267925
35241.1.fasta	0.362219
35343.1.fasta	0.626223
35345.1.fasta	0.353784
354260.3.fasta	0.353673
355246.2.fasta	0.442827
359961.2.fasta	0.352583
359962.2.fasta	0.351296
360398.2.fasta	0.334686
36343.2.fasta	0.359901
363555.2.fasta	0.368969
365048.2.fasta	0.443791
369257.2.fasta	0.471891
370623.2.fasta	0.711944
372457.2.fasta	0.392108
373126.3.fasta	0.508263
373403.2.fasta	0.629365
373404.2.fasta	0.647354
373405.2.fasta	0.628816
373406.2.fasta	0.691058
373407.2.fasta	0.667218
373408.2.fasta	0.615299
373409.2.fasta	0.665103
373410.2.fasta	0.59711
373411.2.fasta	0.596632
373412.2.fasta	0.614178
373413.2.fasta	0.673352
373414.2.fasta	0.689632
373415.2.fasta	0.568516
374525.2.fasta	0.357087
374526.2.fasta	0.357336
374527.2.fasta	0.359886
374529.2.fasta	0.358312
37554.1.fasta	0.497861
376758.2.fasta	0.540233
376821.2.fasta	0.415809
379329.2.fasta	0.49067
379501.2.fasta	0.356304
382359.2.fasta	0.40634
382685.2.fasta	0.370991
384359.2.fasta	0.599178
384360.2.fasta	0.626088
384848.2.fasta	0.509188
386792.2.fasta	0.623171
386793.2.fasta	0.609021
387905.2.fasta	0.341565
387908.2.fasta	0.345857
387909.2.fasta	0.329929
387910.2.fasta	0.34738
388452.2.fasta	0.351108
389469.2.fasta	0.642647
390978.2.fasta	0.41567
393598.2.fasta	0.617449
396034.2.fasta	0.448495
396359.2.fasta	0.281293
397353.2.fasta	0.641902
39803.2.fasta	0.485409
39804.2.fasta	0.512428
398839.2.fasta	0.346753
399183.2.fasta	0.435609
399185.2.fasta	0.349084
400567.2.fasta	0.518027
403905.2.fasta	0.396507
40521.1.fasta	0.361072
40522.2.fasta	0.366841
40523.2.fasta	0.359289
405947.2.fasta	0.355648
40631.1.fasta	0.51172
406340.2.fasta	0.653483
407392.2.fasta	0.32586
413066.2.fasta	0.416114
414970.2.fasta	0.491164
416419.2.fasta	0.648861
417280.2.fasta	0.558931
418443.2.fasta	0.498383
423476.2.fasta	0.374818
424716.2.fasta	0.461255
424944.2.fasta	0.49852
430796.2.fasta	0.330404
431891.2.fasta	0.604491
431892.2.fasta	0.646171
431893.2.fasta	0.654291
431894.2.fasta	0.630508
43685.1.fasta	0.354603
437329.2.fasta	0.562941
437444.2.fasta	0.345637
438482.2.fasta	0.549704
439809.2.fasta	0.617392
440250.2.fasta	0.464797
442493.2.fasta	0.357375
444474.2.fasta	0.35974
444859.3.fasta	0.411376
444860.3.fasta	0.404258
444861.3.fasta	0.406166
444862.3.fasta	0.376443
444878.3.fasta	0.395702
445515.2.fasta	0.336199
445516.2.fasta	0.3359
445517.2.fasta	0.33458
445683.3.fasta	0.41107
445684.3.fasta	0.412509
445685.3.fasta	0.399622
445686.3.fasta	0.391162
445688.3.fasta	0.370864
445696.3.fasta	0.381152
445700.3.fasta	0.378494
446529.2.fasta	0.683145
446807.2.fasta	0.636402
447909.2.fasta	0.447862
448384.2.fasta	0.404992
451705.2.fasta	0.440227
45406.2.fasta	0.353403
455649.2.fasta	0.222109
458639.2.fasta	0.417953
459290.3.fasta	0.384737
459291.2.fasta	0.384801
459845.2.fasta	0.397856
46014.1.fasta	0.319599
462590.2.fasta	0.64262
466051.2.fasta	0.577618
466052.2.fasta	0.577587
467481.2.fasta	0.639315
469660.2.fasta	0.408892
470314.2.fasta	0.519025
47049.2.fasta	0.486421
470865.2.fasta	0.289441
475178.2.fasta	0.336889
476523.2.fasta	0.623318
480808.2.fasta	0.672678
482058.2.fasta	0.58021
482822.2.fasta	0.518835
484895.2.fasta	0.522477
484896.2.fasta	0.622784
487152.2.fasta	0.343264
489779.2.fasta	0.495039
489828.2.fasta	0.448253
489829.2.fasta	0.452242
490103.2.fasta	0.422738
490912.2.fasta	0.479152
490913.2.fasta	0.470399
491003.2.fasta	0.399005
493906.2.fasta	0.488924
494269.2.fasta	0.347244
496396.2.fasta	0.62182
496874.2.fasta	0.4549
499235.2.fasta	0.589782
49964.1.fasta	0.677454
503388.2.fasta	0.336585
504346.2.fasta	0.562639
504501.3.fasta	0.540999
504553.3.fasta	0.539718
505291.2.fasta	0.64329
505292.2.fasta	0.64514
50948.1.fasta	0.404419
511969.2.fasta	0.457528
512792.2.fasta	0.346449
513550.2.fasta	0.386512
51369.1.fasta	0.448895
515982.2.fasta	0.665593
520962.2.fasta	0.596483
526118.2.fasta	0.465409
528321.2.fasta	0.597293
52979.1.fasta	0.430606
529929.2.fasta	0.508644
532074.2.fasta	0.487769
532075.2.fasta	0.49944
532076.2.fasta	0.483896
532077.2.fasta	0.532479
532078.2.fasta	0.472658
53369.2.fasta	0.341031
537874.2.fasta	0.405075
538398.2.fasta	0.549282
538979.2.fasta	0.556397
540064.2.fasta	0.63387
540065.2.fasta	0.637125
540066.2.fasta	0.635724
540067.2.fasta	0.634252
540068.2.fasta	0.632629
541865.2.fasta	0.304209
543152.2.fasta	0.683423
543153.2.fasta	0.562858
543939.2.fasta	0.270403
546182.2.fasta	0.611282
546183.2.fasta	0.62917
546184.2.fasta	0.675665
546185.2.fasta	0.628407
546803.2.fasta	0.647202
546805.2.fasta	0.65436
546806.2.fasta	0.647426
546807.2.fasta	0.648286
546808.2.fasta	0.647767
549445.2.fasta	0.55469
549446.2.fasta	0.55617
551790.2.fasta	0.617377
551895.2.fasta	0.461046
552525.2.fasta	0.364229
55510.3.fasta	0.30261
55511.2.fasta	0.342504
555387.2.fasta	0.411203
555603.2.fasta	0.63843
557289.2.fasta	0.628697
557393.2.fasta	0.438127
55884.1.fasta	0.507687
559189.2.fasta	0.293265
560178.2.fasta	0.392587
561996.2.fasta	0.667722
561997.2.fasta	0.596744
561998.2.fasta	0.595538
561999.2.fasta	0.596119
562742.3.fasta	0.578812
563119.2.fasta	0.617725
563121.2.fasta	0.57337
563122.2.fasta	0.612631
563123.2.fasta	0.612192
563124.2.fasta	0.664982
563769.2.fasta	0.509148
564886.2.fasta	0.511148
565140.2.fasta	0.378017
573591.2.fasta	0.636905
575608.2.fasta	0.349128
575610.2.fasta	0.332459
576789.2.fasta	0.405124
576790.2.fasta	0.395151
576791.2.fasta	0.388938
578234.2.fasta	0.370422
581037.2.fasta	0.55593
582345.3.fasta	0.547938
582382.2.fasta	0.555822
590739.2.fasta	0.474021
591487.2.fasta	0.674839
59241.3.fasta	0.403373
593131.7.fasta	0.53449
59506.3.fasta	0.345866
624134.2.fasta	0.547221
627087.2.fasta	0.36718
627480.2.fasta	0.628685
63118.1.fasta	0.343453
632112.2.fasta	0.373982
633135.2.fasta	0.389857
637730.2.fasta	0.503981
641487.2.fasta	0.343843
641832.2.fasta	0.491088
64186.1.fasta	0.37566
642111.2.fasta	0.429553
644007.2.fasta	0.394903
644524.2.fasta	0.662021
644563.2.fasta	0.428033
645664.3.fasta	0.404449
646413.2.fasta	0.380298
648017.2.fasta	0.335678
649688.2.fasta	0.6669
655097.2.fasta	0.532182
655098.2.fasta	0.55019
658056.2.fasta	0.252721
658401.2.fasta	0.523008
663241.2.fasta	0.343889
663554.2.fasta	0.646029
663557.2.fasta	0.638722
665032.2.fasta	0.562774
665033.2.fasta	0.517604
665883.2.fasta	0.346995
665886.2.fasta	0.351465
665887.2.fasta	0.350253
6666666.13470.fasta	0.635318
6666666.13471.fasta	0.688259
6666666.13472.fasta	0.639434
6666666.3708.fasta	0.666158
6666666.3709.fasta	0.628572
6666666.3710.fasta	0.597968
6666666.3712.fasta	0.634357
6666666.3713.fasta	0.613582
6666666.3715.fasta	0.634481
6666666.3719.fasta	0.636499
6666666.3720.fasta	0.647698
6666666.3721.fasta	0.64182
6666666.3723.fasta	0.66515
6666666.3724.fasta	0.665301
6666666.3725.fasta	0.684229
6666666.3726.fasta	0.666063
6666666.3728.fasta	0.599598
6666666.3729.fasta	0.675409
6666666.3730.fasta	0.646808
6666666.3731.fasta	0.663943
6666666.3734.fasta	0.689098
6666666.3736.fasta	0.689928
6666666.3737.fasta	0.675258
6666666.3738.fasta	0.665688
6666666.3739.fasta	0.670777
6666666.3740.fasta	0.636879
6666666.3741.fasta	0.607317
6666666.3747.fasta	0.690748
6666666.3749.fasta	0.664945
6666666.3754.fasta	0.675639
6666666.3755.fasta	0.615458
6666666.3757.fasta	0.638066
6666666.3758.fasta	0.659883
6666666.3759.fasta	0.617524
6666666.3760.fasta	0.611696
6666666.3761.fasta	0.646848
6666666.3762.fasta	0.684376
6666666.3763.fasta	0.630077
6666666.3764.fasta	0.615334
6666666.3765.fasta	0.589179
6666666.3766.fasta	0.664557
6666666.3768.fasta	0.674859
6666666.3769.fasta	0.609543
6666666.3770.fasta	0.646478
6666666.3772.fasta	0.614272
6666666.3774.fasta	0.613693
6666666.3776.fasta	0.617584
6666666.3777.fasta	0.664746
6666666.3778.fasta	0.689552
6666666.3779.fasta	0.62962
6666666.3780.fasta	0.664492
6666666.3781.fasta	0.66564
6666666.3782.fasta	0.612392
6666666.3783.fasta	0.66519
6666666.3784.fasta	0.667943
6666666.3785.fasta	0.665047
6666666.3787.fasta	0.636393
6666666.3788.fasta	0.61573
6666666.3789.fasta	0.639818
6666666.3790.fasta	0.587807
6666666.3791.fasta	0.674777
6666666.3793.fasta	0.665204
6666666.3794.fasta	0.665091
6666666.3797.fasta	0.636305
6666666.3798.fasta	0.638367
6666666.3800.fasta	0.65295
6666666.3802.fasta	0.637603
6666666.3803.fasta	0.639318
6666666.3804.fasta	0.629688
6666666.3805.fasta	0.648373
6666666.3806.fasta	0.613452
6666666.3808.fasta	0.63424
6666666.3809.fasta	0.640414
6666666.3810.fasta	0.610549
6666666.3811.fasta	0.637523
6666666.3812.fasta	0.636371
6666666.3813.fasta	0.646515
6666666.3815.fasta	0.596778
6666666.3816.fasta	0.663882
6666666.3818.fasta	0.664523
6666666.3819.fasta	0.607907
6666666.3821.fasta	0.663272
6666666.3823.fasta	0.625762
6666666.3827.fasta	0.664607
6666666.3830.fasta	0.673034
6666666.3837.fasta	0.628537
6666666.3839.fasta	0.645297
6666666.3840.fasta	0.608726
6666666.3841.fasta	0.6428
6666666.3842.fasta	0.611277
6666666.3844.fasta	0.665025
6666666.3845.fasta	0.647818
6666666.3846.fasta	0.559982
6666666.3847.fasta	0.664569
6666666.3848.fasta	0.63877
6666666.3849.fasta	0.629224
6666666.3851.fasta	0.685573
6666666.3852.fasta	0.665612
6666666.3853.fasta	0.637558
6666666.3854.fasta	0.664553
6666666.3855.fasta	0.607936
6666666.3857.fasta	0.630174
6666666.3861.fasta	0.587932
6666666.3862.fasta	0.63846
6666666.3863.fasta	0.664803
6666666.3864.fasta	0.640465
6666666.3865.fasta	0.664501
6666666.3867.fasta	0.617863
6666666.3869.fasta	0.674382
6666666.3870.fasta	0.664882
6666666.3871.fasta	0.610229
6666666.3872.fasta	0.688755
6666666.3874.fasta	0.665079
6666666.3878.fasta	0.636487
6666666.3879.fasta	0.595669
6666666.3880.fasta	0.618714
6666666.3883.fasta	0.629579
6666666.3884.fasta	0.663817
6666666.3885.fasta	0.647597
6666666.3888.fasta	0.647319
6666666.3890.fasta	0.613309
6666666.3892.fasta	0.638736
6666666.3893.fasta	0.618839
6666666.3911.fasta	0.646662
6666666.4038.fasta	0.618288
66797.1.fasta	0.34635
668618.2.fasta	0.339933
668994.3.fasta	0.679502
669008.3.fasta	0.487319
670252.3.fasta	0.567568
673375.2.fasta	0.545817
673832.2.fasta	0.340135
673835.2.fasta	0.346071
673837.2.fasta	0.345462
673839.2.fasta	0.377774
674081.2.fasta	0.540156
674082.2.fasta	0.5237
67571.2.fasta	0.438862
682370.2.fasta	0.393948
683735.2.fasta	0.424426
685506.5.fasta	0.61491
686439.2.fasta	0.570074
693582.2.fasta	0.589143
693627.2.fasta	0.381918
693628.2.fasta	0.389842
693629.2.fasta	0.376954
697227.5.fasta	0.395906
700939.3.fasta	0.403332
70203.1.fasta	0.434227
70734.2.fasta	0.488975
707757.5.fasta	0.418314
709484.3.fasta	0.399184
71366.1.fasta	0.335547
714583.4.fasta	0.4706
72638.1.fasta	0.38274
74336.1.fasta	0.487313
743813.3.fasta	0.494882
747763.5.fasta	0.662539
753084.3.fasta	0.544738
753085.3.fasta	0.607199
75320.1.fasta	0.425993
75590.1.fasta	0.290335
75725.1.fasta	0.508239
760732.3.fasta	0.390059
760939.3.fasta	0.400278
762660.3.fasta	0.363662
762906.5.fasta	0.520831
764561.3.fasta	0.37296
764562.3.fasta	0.36377
767806.3.fasta	0.345766
77048.1.fasta	0.463062
77775.1.fasta	0.390064
78541.1.fasta	0.38556
83129.2.fasta	0.346801
83201.1.fasta	0.445266
85154.1.fasta	0.382612
857312.3.fasta	0.414245
861044.5.fasta	0.663881
861045.5.fasta	0.668768
861047.5.fasta	0.588349
864178.3.fasta	0.283799
866889.3.fasta	0.489262
867696.3.fasta	0.4522
871584.5.fasta	0.312556
872294.5.fasta	0.340161
877240.4.fasta	0.408209
879628.3.fasta	0.412973
879630.3.fasta	0.429968
881953.3.fasta	0.326894
88870.1.fasta	0.681137
90410.1.fasta	0.390722
90963.1.fasta	0.409803
910473.3.fasta	0.637072
910474.3.fasta	0.632252
910475.3.fasta	0.622799
925984.3.fasta	0.473297
925986.3.fasta	0.438302
926543.3.fasta	0.616621
93224.1.fasta	0.22652
934027.3.fasta	0.261535
942165.3.fasta	0.562712
97081.1.fasta	0.49913
977927.3.fasta	0.393854
979525.3.fasta	0.370733
979533.3.fasta	0.426774
979535.3.fasta	0.428579
981330.3.fasta	0.695736
988656.3.fasta	0.581644
99179.2.fasta	0.386276
